# Supplementary material for: The Acinetobacter baumannii Two-Component System AdeRS Regulates Genes Required for Multidrug Efflux, Biofilm Formation, and Virulence in a Strain-Specific Manner
Source: PubMed Central journal article supplement (PMC4850262; doi:10.1128/mbio.00430-16), 2016-04-19
Supplement: mbo002162774sf1.pdf [file mbo002162774sf1.pdf]

- 1 **Fig S1** Relationships between 615 *A. baumannii* isolates based on MLST data (Pasteur scheme) as calculated by the BURST
- 2 algorithm. Circles indicate major international groups responsible for the majority of disease. Arrows indicate strains used in this
- 3 study. ATCC 19606 represents a singleton ST (ST 52) and is not on this network.

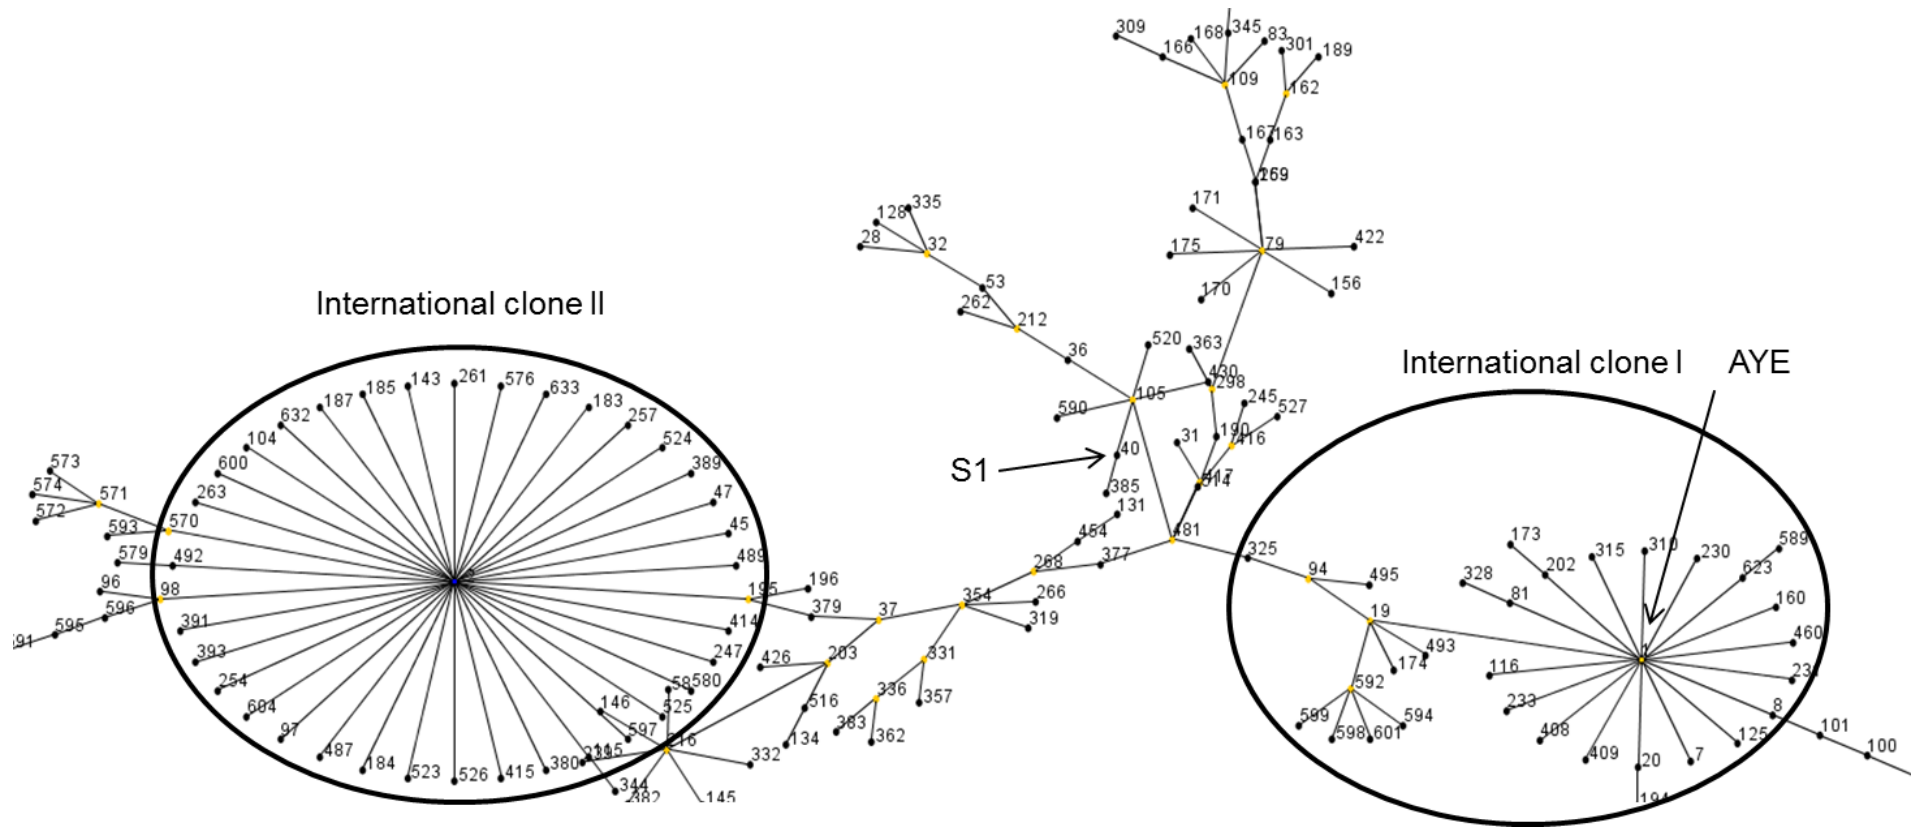

4
