# Supplementary material for: The Acinetobacter baumannii Two-Component System AdeRS Regulates Genes Required for Multidrug Efflux, Biofilm Formation, and Virulence in a Strain-Specific Manner
Source: PubMed Central journal article supplement (PMC4850262; doi:10.1128/mbio.00430-16), 2016-04-19

**Figure S2.** Growth at 37°C, as determined by optical density.

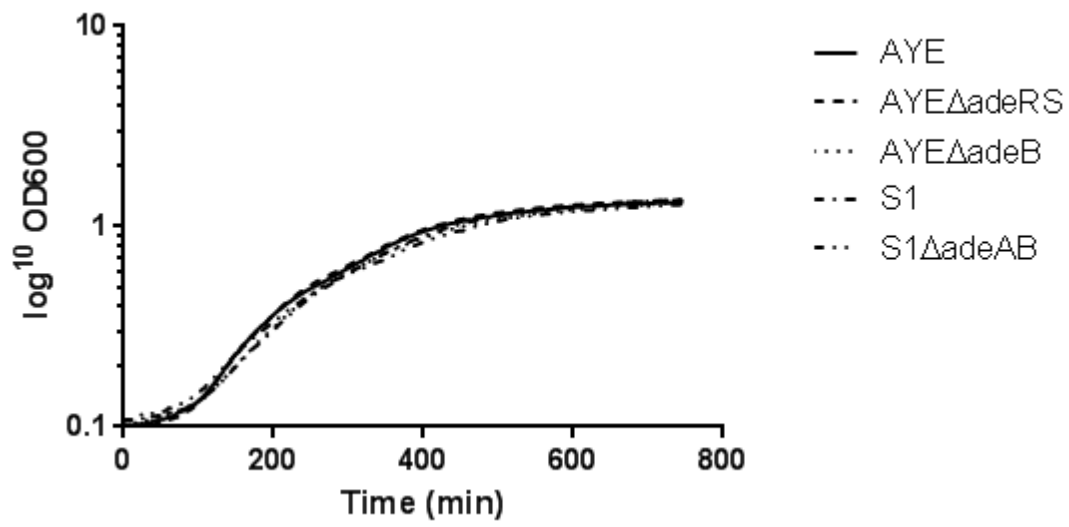

Supplement: mbo002162774sf2.pdf [file mbo002162774sf2.pdf]
