# Supplementary material for: The Acinetobacter baumannii Two-Component System AdeRS Regulates Genes Required for Multidrug Efflux, Biofilm Formation, and Virulence in a Strain-Specific Manner
Source: PubMed Central journal article supplement (PMC4850262; doi:10.1128/mbio.00430-16), 2016-04-19

**Figure S3.** A representative example of confirmation of MIC changes in *AYEΔadeRS* and *AYEΔadeB* by measurement of growth kinetics in the presence of increasing concentrations of tetracycline, as determined by optical density.

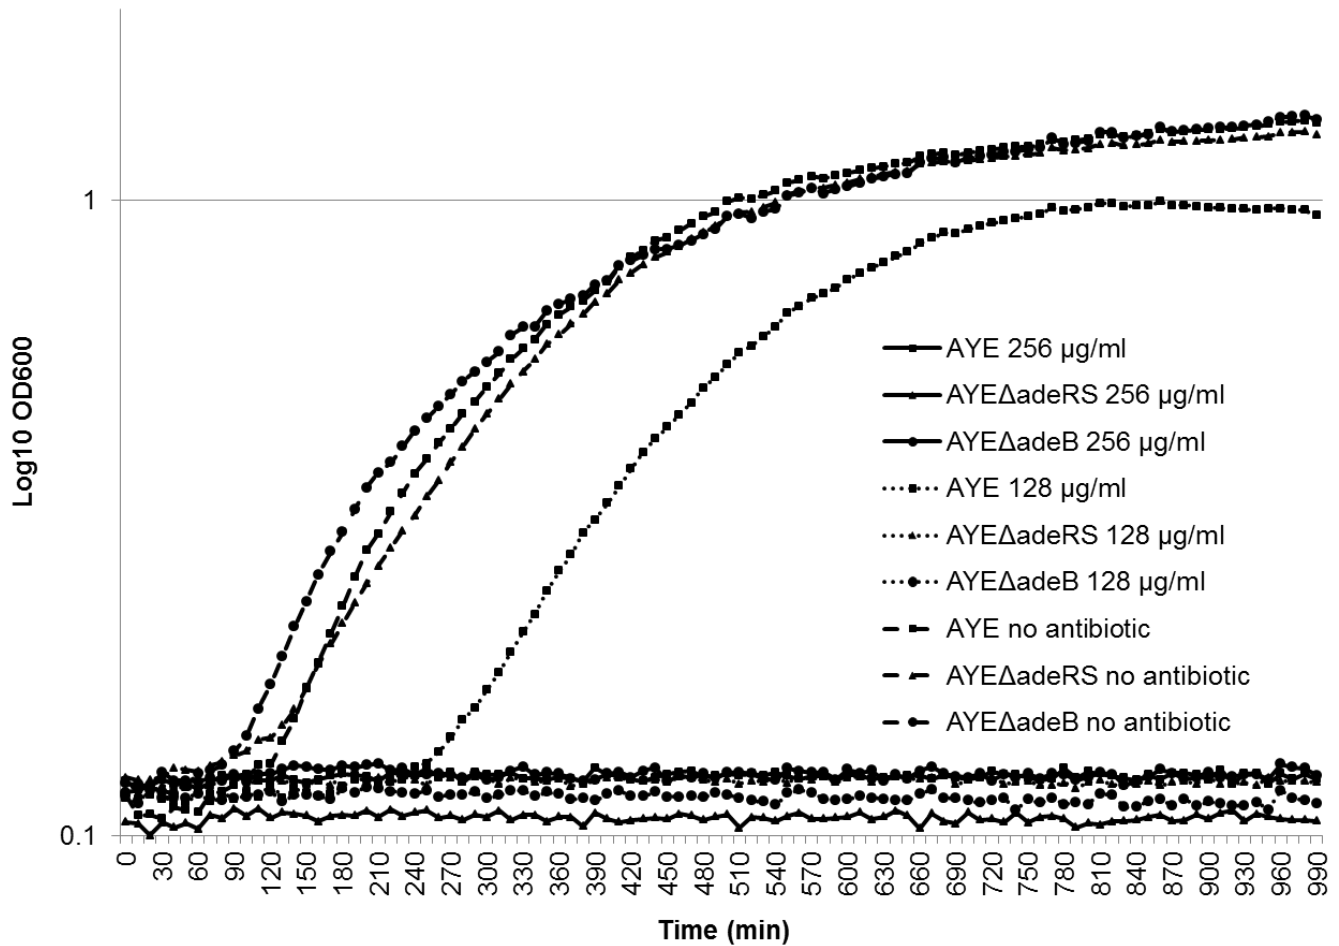

Supplement: mbo002162774sf3.pdf [file mbo002162774sf3.pdf]
