# Supplementary material for: The Acinetobacter baumannii Two-Component System AdeRS Regulates Genes Required for Multidrug Efflux, Biofilm Formation, and Virulence in a Strain-Specific Manner
Source: PubMed Central journal article supplement (PMC4850262; doi:10.1128/mbio.00430-16), 2016-04-19

**Figure S4.** Adherent bacterial growth on mucosa , as determined by bacterial cell counts.

(A) AdeRS and AdeB mutants in AYE

(B) AdeAB mutant in S1

A

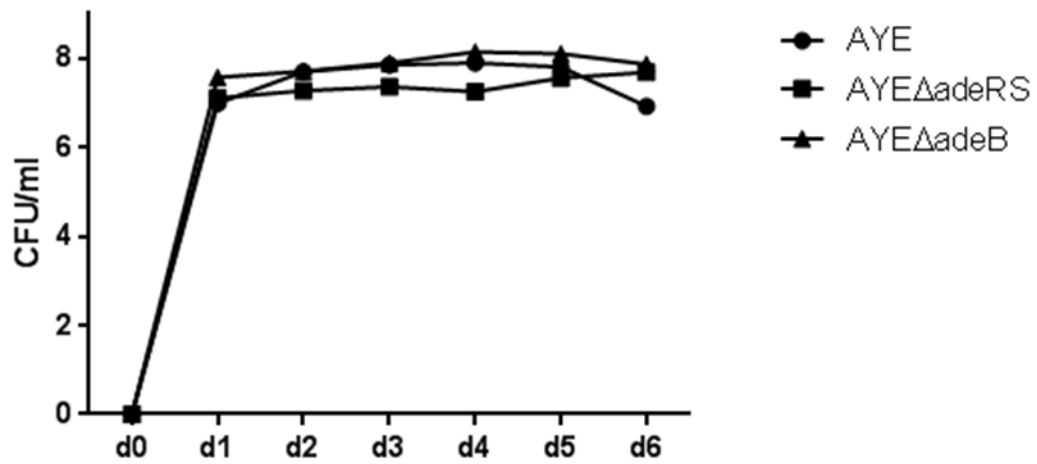

B

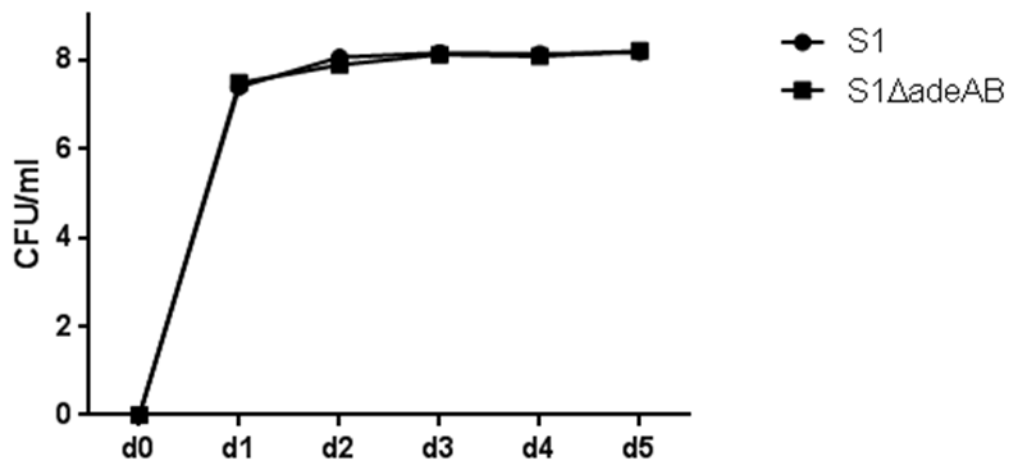

Supplement: mbo002162774sf4.pdf [file mbo002162774sf4.pdf]
