# Supplementary material for: The Acinetobacter baumannii Two-Component System AdeRS Regulates Genes Required for Multidrug Efflux, Biofilm Formation, and Virulence in a Strain-Specific Manner
Source: PubMed Central journal article supplement (PMC4850262; doi:10.1128/mbio.00430-16), 2016-04-19
Supplement: mbo002162774st1.pdf [file mbo002162774st1.pdf]

**Table S1** Gene expression data from the complete transcriptome analysis of *A. baumannii* AYE by RNA-Seq, showing differentially expressed genes ( $P < 0.05$ ) in AYE $\Delta$ adeRS compared with AYE.

| ABAYE Gene ID | Annotation                                                       | Gene Name | log2 Fold Change | Fold Change | P.Value |
|---------------|------------------------------------------------------------------|-----------|------------------|-------------|---------|
| ABAYE1538     | biotin carboxyl carrier protein of acetyl-CoA carboxylase (BCCP) | accB      | 0.66             | 1.58        | 0.01    |
| ABAYE1877     | Zn-dependent dipeptidase                                         | acdP      | -0.68            | 0.62        | 0.03    |
| ABAYE3228     | aconitate hydratase 1                                            | acnA      | -0.87            | 0.55        | 0.01    |
| ABAYE3205     | Copper-transporting P-type ATPase                                | actP      | -0.85            | 0.55        | 0.02    |
| ABAYE1821     | membrane fusion protein                                          | adeA      | -7.00            | 0.01        | 0.00    |
| ABAYE1822     | RND protein                                                      | adeB      | -6.50            | 0.01        | 0.00    |
| ABAYE1823     | outer membrane protein                                           | adeC      | -4.80            | 0.04        | 0.00    |
| ABAYE1820     | two-component response regulator                                 | adeR      | 0.80             | 1.74        | 0.01    |
| ABAYE1819     | two-component sensor                                             | adeS      | -6.90            | 0.01        | 0.00    |
| ABAYE2872     | arginine/ornithine antiporter                                    | arcD      | 0.56             | 1.47        | 0.04    |
| ABAYE3839     | N-alpha-acetylglutamate synthase (amino-acid acetyltransferase)  | argA      | 0.54             | 1.45        | 0.03    |
| ABAYE1539     | 3-dehydroquinate dehydratase%2C type II                          | aroQ      | 1.80             | 3.48        | 0.00    |
| ABAYE3621     | Rifampin ADP-ribosylating transferase ARR-2                      | arr-2     | 1.20             | 2.30        | 0.02    |

|           |                                                                                                                               |      |       |      |      |
|-----------|-------------------------------------------------------------------------------------------------------------------------------|------|-------|------|------|
| ABAYE3656 | arsenate reductase (Arsenical pump modifier)                                                                                  | arsC | 0.80  | 1.74 | 0.05 |
| ABAYE3657 | arsenical resistance operon repressor                                                                                         | arsR | 1.10  | 2.14 | 0.02 |
| ABAYE1921 | aspartate ammonia-lyase (aspartase)                                                                                           | aspA | 0.65  | 1.57 | 0.02 |
| ABAYE2188 | glutaminase-asparaginase                                                                                                      | aspQ | 1.90  | 3.73 | 0.01 |
| ABAYE0353 | arginine succinyltransferase                                                                                                  | astA | 1.60  | 3.03 | 0.03 |
| ABAYE0355 | succinylarginine dihydrolase                                                                                                  | astB | 0.85  | 1.80 | 0.03 |
| ABAYE0354 | succinylglutamic semialdehyde dehydrogenase                                                                                   | astD | 0.95  | 1.93 | 0.01 |
| ABAYE0356 | succinylglutamate desuccinylase                                                                                               | astE | 0.71  | 1.64 | 0.03 |
| ABAYE3715 | membrane-bound ATP synthase %2C F1 sector%2C epsilon-subunit                                                                  | atpC | -0.96 | 0.51 | 0.04 |
| ABAYE1096 | bifunctional: 2%2C3-Dihydroxybenzoate-AMP ligase / S-dihydroxybenzoyltransferase                                              | basE | 0.63  | 1.55 | 0.05 |
| ABAYE1097 | 2%2C3-dihydro-2%2C3-dihydroxybenzoate synthetase (isochorismatase) (N-terminal) with aryl carrier protein domain (C-terminal) | basF | 0.67  | 1.59 | 0.04 |
| ABAYE1090 | Ferric acinetobactin transport system permease protein                                                                        | bauC | 0.75  | 1.68 | 0.01 |
| ABAYE1909 | 3-hydroxybutyrate dehydrogenase                                                                                               | bdhA | -1.10 | 0.47 | 0.03 |
| ABAYE0307 | bacterioferritin                                                                                                              | bfrB | -1.80 | 0.29 | 0.05 |
| ABAYE2129 | biotin synthetase                                                                                                             | bioB | 0.76  | 1.69 | 0.01 |
| ABAYE3001 | dethiobiotin synthetase (Dethiobiotin synthase) (DTB synthetase) (DTBS)                                                       | bioD | 0.52  | 1.43 | 0.05 |

|           |                                                                                                                                     |      |       |      |      |
|-----------|-------------------------------------------------------------------------------------------------------------------------------------|------|-------|------|------|
| ABAYE0800 | carbamoyl-phosphate synthase%2C large subunit                                                                                       | carB | -0.58 | 0.67 | 0.05 |
| ABAYE1719 | muconolactone delta-isomerase (Mlase)                                                                                               | catC | 1.10  | 2.14 | 0.01 |
| ABAYE3411 | curved DNA-binding protein                                                                                                          | cbpA | -0.62 | 0.65 | 0.05 |
| ABAYE2787 | citrate transporter                                                                                                                 | citN | 1.30  | 2.46 | 0.03 |
| ABAYE3288 | ATP-dependent Clp protease proteolytic subunit (Endopeptidase Clp) (Caseinolytic protease) (Protease Ti) (Heat shock protein F21.5) | clpP | 0.72  | 1.65 | 0.05 |
| ABAYE3620 | Chloramphenicol resistance protein                                                                                                  | cmlA | 0.64  | 1.56 | 0.03 |
| ABAYE3447 | dephosphocoenzyme A kinase                                                                                                          | coaE | 0.77  | 1.71 | 0.01 |
| ABAYE0316 | pilin like competence factor                                                                                                        | comB | 2.60  | 6.06 | 0.01 |
| ABAYE0319 | Pilin like competence factor                                                                                                        | comE | 1.30  | 2.46 | 0.01 |
| ABAYE0320 | pilin like competence factor                                                                                                        | comF | 1.50  | 2.83 | 0.02 |
| ABAYE0143 | catabolite repression control protein                                                                                               | crc  | 0.72  | 1.65 | 0.02 |
| ABAYE2535 | cold shock-like protein                                                                                                             | csp  | -2.10 | 0.23 | 0.04 |
| ABAYE0930 | sulfate transport protein (ABC superfamily%2C peri_bind)                                                                            | cysP | 2.20  | 4.59 | 0.04 |
| ABAYE1567 | D-amino acid dehydrogenase%2C small subunit                                                                                         | dadA | -0.81 | 0.57 | 0.02 |
| ABAYE3774 | D-amino acid dehydrogenase%2C small subunit                                                                                         | dadA | 0.97  | 1.96 | 0.01 |
| ABAYE2315 | acyl-CoA dehydrogenase                                                                                                              | dcaA | 1.10  | 2.14 | 0.04 |
| ABAYE2307 | beta-ketoadipyl CoA thiolase                                                                                                        | dcaF | 1.20  | 2.30 | 0.01 |

|           |                                                                            |      |       |      |      |
|-----------|----------------------------------------------------------------------------|------|-------|------|------|
| ABAYE2306 | dehydrogenase                                                              | dcaH | 1.30  | 2.46 | 0.03 |
| ABAYE2301 | acyl-CoA-transferase subunit A                                             | dcaI | 1.80  | 3.48 | 0.01 |
| ABAYE1730 | Dihydrocoumarin hydrolase                                                  | dch  | -1.10 | 0.47 | 0.03 |
| ABAYE2265 | fragment of RecA-dependent DNA damage-inducible protein (partial)          | ddrR | -1.30 | 0.41 | 0.01 |
| ABAYE2833 | peptide deformylase 2                                                      | def2 | 0.88  | 1.84 | 0.02 |
| ABAYE1343 | delta 9 acyl-lipid fatty acid desaturase                                   | desC | -0.68 | 0.62 | 0.02 |
| ABAYE3796 | D-lactate dehydrogenase%2C NADH independent%2C FAD-binding domain          | dld  | 0.71  | 1.64 | 0.02 |
| ABAYE3833 | thiol:disulfide interchange protein%2C periplasmic%2C alkali-inducible     | dsbA | 1.60  | 3.03 | 0.05 |
| ABAYE2929 | deoxyuridine 5-triphosphate nucleotidohydrolase                            | dut  | 1.40  | 2.64 | 0.03 |
| ABAYE3569 | ethidium bromide resistance protein (E1 protein)                           | ebr  | 0.71  | 1.64 | 0.01 |
| ABAYE3613 | ethidium bromide resistance protein (E1 protein)                           | ebr  | 0.65  | 1.57 | 0.02 |
| ABAYE3617 | ethidium bromide resistance protein (E1 protein)                           | ebr  | 0.63  | 1.55 | 0.02 |
| ABAYE3642 | ethidium bromide resistance protein (E1 protein)                           | ebr  | 0.65  | 1.57 | 0.02 |
| ABAYE0677 | bacteriolytic lipoprotein entericidin B.                                   | ecnB | -3.00 | 0.13 | 0.03 |
| ABAYE2951 | beta-ketoacyl-ACP synthase I (3-oxoacyl-[acyl-carrier-protein] synthase I) | fabB | 0.96  | 1.95 | 0.04 |
| ABAYE3250 | NADH-dependent enoyl-ACP reductase                                         | fabI | 0.78  | 1.72 | 0.02 |
| ABAYE0436 | acyl coenzyme A dehydrogenase                                              | fadE | 1.00  | 2.00 | 0.03 |

|           |                                                                                                                             |      |       |      |      |
|-----------|-----------------------------------------------------------------------------------------------------------------------------|------|-------|------|------|
| ABAYE2479 | 7-Fe ferredoxin                                                                                                             | fdxA | -0.71 | 0.61 | 0.03 |
| ABAYE3315 | dihydrofolate reductase                                                                                                     | folA | -0.59 | 0.66 | 0.04 |
| ABAYE3284 | fumarate hydratase                                                                                                          | fumA | -0.62 | 0.65 | 0.04 |
| ABAYE1563 | fumarase C (fumarate hydratase Class II)                                                                                    | fumC | -0.93 | 0.52 | 0.01 |
| ABAYE2920 | negative regulator of ferric iron uptake                                                                                    | fur  | -0.60 | 0.66 | 0.04 |
| ABAYE0210 | NADP+-dependent succinate semialdehyde dehydrogenase                                                                        | gabD | -0.92 | 0.53 | 0.02 |
| ABAYE0633 | glucose dehydrogenase [pyrroloquinoline-quinone] precursor (Quinoprotein glucose DH)                                        | gcd  | -0.68 | 0.62 | 0.04 |
| ABAYE0351 | glutamate dehydrogenase (NAD(P)+) oxidoreductase protein                                                                    | gdh  | 0.76  | 1.69 | 0.02 |
| ABAYE3549 | regulatory protein%2C P-II 2%2C for nitrogen assimilation by glutamine synthetase%2C regulates GlnL (NRII) and GlnE (ATase) | glnK | 0.87  | 1.83 | 0.04 |
| ABAYE3279 | high-affinity gluconate permease (GntP family)                                                                              | gntT | 0.90  | 1.87 | 0.05 |
| ABAYE0799 | transcription elongation factor%2C cleaves 3 nucleotide of paused mRNA                                                      | greA | 0.87  | 1.83 | 0.05 |
| ABAYE2631 | acyl coenzyme A dehydrogenase                                                                                               | hcaD | 1.50  | 2.83 | 0.00 |
| ABAYE2632 | porin                                                                                                                       | hcaE | 0.58  | 1.49 | 0.05 |
| ABAYE3507 | uroporphyrinogen-III synthase (UROS) (Uroporphyrinogen-III cosynthetase) (Hydroxymethylbilane hydrolyase [cyclizing])       | hemD | 0.54  | 1.45 | 0.04 |
| ABAYE3158 | integration host factor (IHF)%2C alpha subunit%2C DNA-binding protein%2C DNA replication                                    | himA | -0.91 | 0.53 | 0.00 |

|           |                                                                                                                                                                   |      |       |      |      |
|-----------|-------------------------------------------------------------------------------------------------------------------------------------------------------------------|------|-------|------|------|
| ABAYE1179 | Histidine transport system permease protein (ABC superfamily%2C membrane)                                                                                         | hisM | 0.65  | 1.57 | 0.03 |
| ABAYE3238 | acetohydroxy acid isomeroeductase                                                                                                                                 | ilvC | 0.77  | 1.71 | 0.03 |
| ABAYE3239 | acetolactate synthase isozyme III%2C small subunit                                                                                                                | ilvH | 0.56  | 1.47 | 0.05 |
| ABAYE2022 | iron-binding protein believed to be involved in Fe-S protein formation or repair%3B function as a scaffold for the assembly of the transiently bound Fe/S cluster | iscU | -0.77 | 0.59 | 0.04 |
| ABAYE2270 | Catalase hydroperoxidase II                                                                                                                                       | katE | -2.00 | 0.25 | 0.00 |
| ABAYE0326 | lipase chaperone (Lipase foldase) (Lipase helper protein) (Lipase activator protein) (Lipase modulator)                                                           | lifO | 1.10  | 2.14 | 0.04 |
| ABAYE3797 | L-lactate dehydrogenase%2C FMN linked                                                                                                                             | lldD | 0.97  | 1.96 | 0.04 |
| ABAYE3775 | transcriptional regulator for lrp regulon and high-affinity branched-chain amino acid transport system%2C mediator of leucine response (AsnC family)              | lrp  | 1.30  | 2.46 | 0.02 |
| ABAYE3853 | prolipoprotein signal peptidase (Signal peptidase II.)                                                                                                            | lspA | 0.67  | 1.59 | 0.03 |
| ABAYE2233 | malonate decarboxylase%2C alpha subunit                                                                                                                           | mdcA | 0.69  | 1.61 | 0.03 |
| ABAYE2231 | malonate decarboxylase%2C delta subunit                                                                                                                           | mdcC | 1.10  | 2.14 | 0.02 |
| ABAYE2230 | malonate decarboxylase%2C beta subunit                                                                                                                            | mdcD | 0.80  | 1.74 | 0.03 |
| ABAYE3605 | Mercuric reductase (Hg(II) reductase)                                                                                                                             | merA | -0.98 | 0.51 | 0.03 |
| ABAYE1448 | delta(2)-isopentenylpyrophosphate tRNA-adenosine transferase                                                                                                      | miaA | -1.30 | 0.41 | 0.00 |
| ABAYE2936 | cell division topological specificity factor (reverses minC inhibition of                                                                                         | minE | -0.64 | 0.64 | 0.02 |

|           |                                                                                                   |       |       |      |      |
|-----------|---------------------------------------------------------------------------------------------------|-------|-------|------|------|
|           | FtsZ ring)                                                                                        |       |       |      |      |
| ABAYE0703 | rod shape-determining protein                                                                     | mreD  | 0.91  | 1.88 | 0.02 |
| ABAYE0647 | mechanosensitive channel                                                                          | mscL  | -1.00 | 0.50 | 0.00 |
| ABAYE0183 | NADH-dependent FMN reductase                                                                      | msuE  | 1.40  | 2.64 | 0.02 |
| ABAYE3095 | cis%2Ccis-muconate transport protein (MFS superfamily)                                            | muckK | 1.20  | 2.30 | 0.02 |
| ABAYE1542 | response regulator protein                                                                        | nasT  | -1.60 | 0.33 | 0.02 |
| ABAYE2766 | endonuclease III DNA glycosylase/apurimidine (AP) lyase                                           | nth   | -0.67 | 0.63 | 0.03 |
| ABAYE3059 | NADH dehydrogenase I chain B                                                                      | nuoB  | 0.73  | 1.66 | 0.02 |
| ABAYE3007 | trehalose-6-phosphate synthase                                                                    | otsA  | -2.50 | 0.18 | 0.01 |
| ABAYE2375 | subunit of Phenylacetate-CoA oxygenase%2C phenylacetic acid degradation                           | paaA  | 3.20  | 9.19 | 0.05 |
| ABAYE2367 | beta-ketoadipyl CoA thiolase with thiolase-like domain%2C phenylacetic acid degradation           | paaJ  | 2.60  | 6.06 | 0.04 |
| ABAYE0901 | peptidoglycan-associated lipoprotein precursor                                                    | pal   | -0.69 | 0.62 | 0.05 |
| ABAYE3532 | D-alanyl-D-alanine endopeptidase%2C penicillin-binding protein 7 and penicillin-binding protein 8 | pbpG  | -0.88 | 0.54 | 0.02 |
| ABAYE0818 | phosphoenolpyruvate carboxykinase [GTP] (PEP carboxykinase) (PEPCK)                               | pckG  | -0.70 | 0.62 | 0.03 |
| ABAYE3111 | copper resistance protein A precursor                                                             | pcoA  | -0.78 | 0.58 | 0.05 |
| ABAYE3444 | type 4 fimbrial biogenesis protein                                                                | pilB  | 2.20  | 4.59 | 0.00 |

|           |                                                                                                                                                                          |      |       |      |      |
|-----------|--------------------------------------------------------------------------------------------------------------------------------------------------------------------------|------|-------|------|------|
| ABAYE3445 | type 4 fimbrial assembly protein                                                                                                                                         | pilC | 1.80  | 3.48 | 0.01 |
| ABAYE3446 | type 4 prepilin-like proteins leader peptide processing enzyme (Protein secretion protein XCPA)[Includes: Leader peptidase (Prepilin peptidase)%3B N-methyltransferase ] | pilD | 1.50  | 2.83 | 0.00 |
| ABAYE0667 | twitching motility protein                                                                                                                                               | pilG | 2.10  | 4.29 | 0.01 |
| ABAYE0668 | twitching motility protein                                                                                                                                               | pilH | 1.30  | 2.46 | 0.04 |
| ABAYE0669 | twitching motility protein                                                                                                                                               | pilI | 2.40  | 5.28 | 0.01 |
| ABAYE0670 | type IV pilus biogenesis protein                                                                                                                                         | pilJ | 2.30  | 4.92 | 0.00 |
| ABAYE3535 | type 4 fimbriae expression regulatory protein                                                                                                                            | pilR | 1.50  | 2.83 | 0.01 |
| ABAYE2918 | twitching motility protein                                                                                                                                               | pilT | 3.00  | 8.00 | 0.00 |
| ABAYE2919 | twitching motility protein                                                                                                                                               | pilU | 2.90  | 7.46 | 0.01 |
| ABAYE2074 | type 4 fimbrial biogenesis protein                                                                                                                                       | pilZ | 0.74  | 1.67 | 0.04 |
| ABAYE3675 | inorganic pyrophosphatase                                                                                                                                                | ppa  | 0.97  | 1.96 | 0.03 |
| ABAYE3232 | peptide chain release factor 3                                                                                                                                           | prfC | -0.80 | 0.57 | 0.05 |
| ABAYE3793 | methylisocitrate lyase                                                                                                                                                   | prpB | 2.00  | 4.00 | 0.02 |
| ABAYE3792 | methylcitrate synthase (citrate synthase 2)                                                                                                                              | prpC | 0.62  | 1.54 | 0.04 |
| ABAYE3283 | phosphate acetyltransferase                                                                                                                                              | pta  | 1.30  | 2.46 | 0.02 |
| ABAYE0095 | 6%2C7-dimethyl-8-ribityllumazine synthase (Lumazine synthase)(riboflavin synthase beta chain)                                                                            | ribH | 0.57  | 1.48 | 0.02 |



|           |                                                                    |       |       |      |      |
|-----------|--------------------------------------------------------------------|-------|-------|------|------|
| ABAYE3902 | RNase P%2C protein C5 component%2C processes tRNA%2C 4.5S RNA      | rnpA  | -1.30 | 0.41 | 0.02 |
| ABAYE1650 | ribose 5-phosphate isomerase                                       | rpiA  | -0.83 | 0.56 | 0.03 |
| ABAYE0408 | 50S ribosomal protein L3                                           | rpL3  | 0.55  | 1.46 | 0.03 |
| ABAYE1382 | 50S ribosomal protein L9                                           | rpL9  | -1.20 | 0.44 | 0.01 |
| ABAYE0324 | 50S ribosomal protein L19                                          | rpL19 | -0.50 | 0.71 | 0.04 |
| ABAYE3326 | 50S ribosomal protein L33                                          | rpL33 | -2.10 | 0.23 | 0.00 |
| ABAYE3164 | 50S ribosomal protein L35                                          | rpL35 | -1.30 | 0.41 | 0.03 |
| ABAYE1286 | 30S ribosomal protein S21                                          | rpsU  | 0.87  | 1.83 | 0.02 |
| ABAYE2798 | rubredoxin                                                         | rubA  | -0.68 | 0.62 | 0.03 |
| ABAYE0774 | succinate dehydrogenase%2C cytochrome b556 subunit                 | sdhC  | 0.80  | 1.74 | 0.01 |
| ABAYE3442 | preprotein translocase IISP family%2C auxillary membrane component | secG  | 0.63  | 1.55 | 0.05 |
| ABAYE0332 | D-3-phosphoglycerate dehydrogenase                                 | serA  | 0.81  | 1.75 | 0.05 |
| ABAYE3399 | small ubiquitous protein required for normal growth                | sirA  | -0.81 | 0.57 | 0.01 |
| ABAYE2921 | outer membrane lipoprotein                                         | smpA  | -0.76 | 0.59 | 0.04 |
| ABAYE1356 | L-sorbose dehydrogenase                                            | sndH  | -0.63 | 0.65 | 0.04 |
| ABAYE1134 | superoxide dismutase [Fe]                                          | sodB  | -0.81 | 0.57 | 0.02 |
| ABAYE3841 | alkanesulfonate transport protein (ABC superfamily%2C peri_bind)   | ssuA  | 1.00  | 2.00 | 0.02 |

|             |                                                                                     |       |       |      |      |
|-------------|-------------------------------------------------------------------------------------|-------|-------|------|------|
| ABAYE3107   | suppressor of gro                                                                   | sugE  | 1.20  | 2.30 | 0.00 |
| ABAYE0382   | inositol-1-monophosphatase (IMPase) (Inositol-1-phosphatase) (I-1-Pase)             | suhB  | -1.00 | 0.50 | 0.01 |
| ABAYE3637   | Tetracycline resistance protein%2C class G (TETA(G))                                | tetA  | 1.50  | 2.83 | 0.02 |
| ABAYE1283   | 2-keto-D-gluconate reductase (2-ketoaldonate reductase)                             | tkrA  | 1.10  | 2.14 | 0.03 |
| ABAYE0387   | toluene tolerance efflux transporter (ABC superfamily%2C peri-bind)                 | ttg2C | -0.81 | 0.57 | 0.04 |
| ABAYE1710   | Copper amine oxidase precursor (Tyramine oxidase) (2-phenylethylamine oxidase)      | tynA  | 1.40  | 2.64 | 0.04 |
| ABAYE3795   | tyrosine aminotransferase%2C tyrosine repressible%2C PLP-dependent                  | tyrB  | 0.89  | 1.85 | 0.05 |
| ABAYE0716   | undecaprenylpyrophosphate phosphatase (bacitracin resistance protein)               | uppP  | -0.92 | 0.53 | 0.01 |
| ABAYE2778   | urease gamma subunit                                                                | ureA  | 1.80  | 3.48 | 0.01 |
| ABAYE2623   | vanillate O-demethylase oxygenase subunit (4-hydroxy-3-methoxybenzoate demethylase) | vanA  | 1.40  | 2.64 | 0.04 |
| ABAYE2588   | cyclic AMP receptor protein                                                         | vfr   | 1.30  | 2.46 | 0.02 |
| ABAYE0969   | UDP-N-acetyl glucosamine-2-epimerase                                                | wecB  | -0.80 | 0.57 | 0.01 |
| ABAYE_16s_1 | ABAYE_16s_1                                                                         |       | -4.80 | 0.04 | 0.03 |
| ABAYE_16s_2 | ABAYE_16s_2                                                                         |       | -4.50 | 0.04 | 0.04 |
| ABAYE_16s_3 | ABAYE_16s_3                                                                         |       | -4.70 | 0.04 | 0.03 |

|             |                                                                                 |  |       |      |      |
|-------------|---------------------------------------------------------------------------------|--|-------|------|------|
| ABAYE_16s_4 | ABAYE_16s_4                                                                     |  | -4.60 | 0.04 | 0.05 |
| ABAYE_16s_5 | ABAYE_16s_5                                                                     |  | -4.90 | 0.03 | 0.03 |
| ABAYE_16s_6 | ABAYE_16s_6                                                                     |  | -4.80 | 0.04 | 0.03 |
| ABAYE_23s_1 | ABAYE_23s_1                                                                     |  | -4.40 | 0.05 | 0.03 |
| ABAYE_23s_2 | ABAYE_23s_2                                                                     |  | -4.40 | 0.05 | 0.03 |
| ABAYE_23s_3 | ABAYE_23s_3                                                                     |  | -4.30 | 0.05 | 0.03 |
| ABAYE_23s_4 | ABAYE_23s_4                                                                     |  | -4.40 | 0.05 | 0.02 |
| ABAYE_23s_5 | ABAYE_23s_5                                                                     |  | -4.40 | 0.05 | 0.02 |
| ABAYE_23s_6 | ABAYE_23s_6                                                                     |  | -4.40 | 0.05 | 0.02 |
| ABAYE_5s_1  | ABAYE_5s_1                                                                      |  | -0.87 | 0.55 | 0.04 |
| ABAYE_5s_2  | ABAYE_5s_2                                                                      |  | -0.96 | 0.51 | 0.02 |
| ABAYE_5s_4  | ABAYE_5s_4                                                                      |  | -1.10 | 0.47 | 0.00 |
| ABAYE_5s_6  | ABAYE_5s_6                                                                      |  | -0.99 | 0.50 | 0.01 |
| ABAYE0011   | putative chaperone involved in Fe-S cluster assembly and activation (HesB-like) |  | -0.91 | 0.53 | 0.05 |
| ABAYE0016   | putative glutathione S-transferase                                              |  | 0.92  | 1.89 | 0.01 |
| ABAYE0017   | conserved hypothetical protein%3B putative exported protein                     |  | 1.10  | 2.14 | 0.03 |
| ABAYE0020   | conserved hypothetical protein%3B putative signal peptide                       |  | -1.00 | 0.50 | 0.04 |

|           |                                                             |  |       |      |      |
|-----------|-------------------------------------------------------------|--|-------|------|------|
| ABAYE0050 | conserved hypothetical protein%3B putative exported protein |  | -2.20 | 0.22 | 0.03 |
| ABAYE0111 | putative aminotransferase                                   |  | -0.48 | 0.72 | 0.05 |
| ABAYE0112 | conserved hypothetical protein                              |  | -0.65 | 0.64 | 0.04 |
| ABAYE0113 | conserved hypothetical protein%3B putative exported protein |  | -0.63 | 0.65 | 0.04 |
| ABAYE0120 | hypothetical protein%3B putative signal peptide             |  | 0.67  | 1.59 | 0.03 |
| ABAYE0123 | hypothetical protein%3B putative signal peptide             |  | 0.98  | 1.97 | 0.02 |
| ABAYE0130 | conserved hypothetical protein%3B putative exported protein |  | 1.10  | 2.14 | 0.01 |
| ABAYE0137 | conserved hypothetical protein%3B putative exported protein |  | 0.47  | 1.39 | 0.04 |
| ABAYE0141 | conserved hypothetical protein%3B putative exported protein |  | -1.50 | 0.35 | 0.00 |
| ABAYE0142 | conserved hypothetical protein                              |  | 0.67  | 1.59 | 0.04 |
| ABAYE0164 | conserved hypothetical protein%3B putative enzyme           |  | 1.90  | 3.73 | 0.00 |
| ABAYE0165 | putative ferredoxin                                         |  | 1.30  | 2.46 | 0.02 |
| ABAYE0170 | conserved hypothetical protein%3B putative exported protein |  | -0.95 | 0.52 | 0.01 |
| ABAYE0180 | putative isochorismatase                                    |  | 1.20  | 2.30 | 0.00 |
| ABAYE0187 | conserved hypothetical protein                              |  | 2.40  | 5.28 | 0.03 |
| ABAYE0188 | putative sodium:solute symporter                            |  | 2.60  | 6.06 | 0.04 |
| ABAYE0190 | putative high affinity choline transport protein (Bet-like) |  | -0.57 | 0.67 | 0.04 |
| ABAYE0196 | putative transcriptional regulator (TetR/AcrR family)       |  | 0.55  | 1.46 | 0.05 |

|           |                                                             |  |       |      |      |
|-----------|-------------------------------------------------------------|--|-------|------|------|
| ABAYE0219 | conserved hypothetical protein%3B putative membrane protein |  | 0.63  | 1.55 | 0.03 |
| ABAYE0224 | hypothetical protein                                        |  | -1.60 | 0.33 | 0.02 |
| ABAYE0226 | conserved hypothetical protein                              |  | 1.30  | 2.46 | 0.02 |
| ABAYE0228 | hypothetical protein                                        |  | -0.66 | 0.63 | 0.04 |
| ABAYE0237 | putative Efflux protein%2C LysE family                      |  | 0.61  | 1.53 | 0.03 |
| ABAYE0244 | putative homoserine kinase (ThrB)                           |  | 0.72  | 1.65 | 0.03 |
| ABAYE0247 | putative membrane protein                                   |  | 0.61  | 1.53 | 0.02 |
| ABAYE0262 | putative sulfate permease                                   |  | -1.30 | 0.41 | 0.01 |
| ABAYE0266 | conserved hypothetical protein%3B putative signal peptide   |  | 2.30  | 4.92 | 0.01 |
| ABAYE0268 | putative Component of the czc cation-efflux system (Czcl)   |  | 0.85  | 1.80 | 0.01 |
| ABAYE0286 | conserved hypothetical protein                              |  | 2.00  | 4.00 | 0.04 |
| ABAYE0290 | putative membrane protein (ComM)                            |  | 1.90  | 3.73 | 0.00 |
| ABAYE0291 | putative membrane protein (ComN)                            |  | 2.90  | 7.46 | 0.02 |
| ABAYE0292 | putative membrane protein (ComO)                            |  | 2.50  | 5.66 | 0.00 |
| ABAYE0293 | putative lipoprotein (ComL)                                 |  | 3.30  | 9.85 | 0.00 |
| ABAYE0294 | putative outer membrane protein (ComQ)                      |  | 2.50  | 5.66 | 0.00 |
| ABAYE0300 | conserved hypothetical protein                              |  | -0.66 | 0.63 | 0.03 |
| ABAYE0301 | conserved hypothetical protein%3B putative exported protein |  | -0.71 | 0.61 | 0.04 |

|           |                                                                       |  |       |       |      |
|-----------|-----------------------------------------------------------------------|--|-------|-------|------|
| ABAYE0302 | conserved hypothetical protein%3B putative membrane protein           |  | -0.85 | 0.55  | 0.01 |
| ABAYE0303 | conserved hypothetical protein                                        |  | -1.20 | 0.44  | 0.01 |
| ABAYE0304 | putative fimbrial protein precursor (Pilin)                           |  | 3.40  | 10.56 | 0.04 |
| ABAYE0314 | putative Fimbrial protein precursor%3B putative type IV pilin protein |  | 1.90  | 3.73  | 0.02 |
| ABAYE0315 | putative type IV fimbrial biogenesis protein                          |  | 2.90  | 7.46  | 0.01 |
| ABAYE0317 | putative type IV fimbrial biogenesis protein                          |  | 2.80  | 6.96  | 0.01 |
| ABAYE0318 | putative competence factor involved in DNA binding and uptake (ComC)  |  | 1.70  | 3.25  | 0.01 |
| ABAYE0329 | conserved hypothetical protein                                        |  | -1.10 | 0.47  | 0.05 |
| ABAYE0330 | conserved hypothetical protein%3B putative membrane protein           |  | -1.10 | 0.47  | 0.01 |
| ABAYE0339 | conserved hypothetical protein%3B putative membrane protein           |  | 0.50  | 1.41  | 0.04 |
| ABAYE0358 | conserved hypothetical protein%3B putative signal peptide             |  | -0.67 | 0.63  | 0.03 |
| ABAYE0370 | conserved hypothetical protein                                        |  | 0.52  | 1.43  | 0.05 |
| ABAYE0403 | putative flavohemoprotein (Hemoglobin-like protein) (Flavohemoglobin) |  | 1.10  | 2.14  | 0.01 |
| ABAYE0438 | conserved hypothetical protein                                        |  | 0.79  | 1.73  | 0.04 |
| ABAYE0441 | putative integral membrane protein%2C transporter                     |  | 0.85  | 1.80  | 0.02 |
| ABAYE0459 | conserved hypothetical protein%3B putative tonB-domain                |  | 0.68  | 1.60  | 0.02 |
| ABAYE0466 | conserved hypothetical protein                                        |  | -1.00 | 0.50  | 0.01 |
| ABAYE0471 | conserved hypothetical protein                                        |  | -1.40 | 0.38  | 0.03 |

|           |                                                                              |  |       |      |      |
|-----------|------------------------------------------------------------------------------|--|-------|------|------|
| ABAYE0493 | conserved hypothetical protein%3B putative membrane protein                  |  | 0.62  | 1.54 | 0.02 |
| ABAYE0506 | conserved hypothetical protein                                               |  | 1.70  | 3.25 | 0.00 |
| ABAYE0518 | conserved hypothetical protein%3B putative exported protein                  |  | -0.98 | 0.51 | 0.04 |
| ABAYE0529 | conserved hypothetical protein                                               |  | 0.90  | 1.87 | 0.02 |
| ABAYE0533 | hypothetical protein                                                         |  | -0.69 | 0.62 | 0.01 |
| ABAYE0534 | hypothetical protein                                                         |  | 0.57  | 1.48 | 0.03 |
| ABAYE0538 | hypothetical protein                                                         |  | 0.75  | 1.68 | 0.03 |
| ABAYE0542 | hypothetical protein                                                         |  | 1.00  | 2.00 | 0.00 |
| ABAYE0543 | conserved hypothetical protein%3B Putative phage-related DNA-binding protein |  | -1.30 | 0.41 | 0.00 |
| ABAYE0550 | conserved hypothetical protein%3B putative phage related protein             |  | 0.92  | 1.89 | 0.01 |
| ABAYE0557 | phage-related major tail sheath protein ( FI-like)                           |  | 1.30  | 2.46 | 0.02 |
| ABAYE0566 | putative phage-related membrane protein                                      |  | 0.91  | 1.88 | 0.01 |
| ABAYE0567 | putative phage-related membrane protein                                      |  | 1.20  | 2.30 | 0.01 |
| ABAYE0587 | putative glycosyl transferase                                                |  | -1.40 | 0.38 | 0.04 |
| ABAYE0591 | putative TonB-dependent receptor protein                                     |  | 0.46  | 1.38 | 0.05 |
| ABAYE0605 | putative cobalamin adenosyltransferase                                       |  | 0.57  | 1.48 | 0.02 |
| ABAYE0636 | putative multidrug transporter                                               |  | -1.40 | 0.38 | 0.00 |

|           |                                                                                                                                    |  |       |      |      |
|-----------|------------------------------------------------------------------------------------------------------------------------------------|--|-------|------|------|
| ABAYE0639 | putative type IV fimbrial biogenesis protein                                                                                       |  | 0.69  | 1.61 | 0.02 |
| ABAYE0662 | conserved hypothetical protein                                                                                                     |  | -0.98 | 0.51 | 0.03 |
| ABAYE0666 | conserved hypothetical protein%3B putative exported protein                                                                        |  | 1.80  | 3.48 | 0.00 |
| ABAYE0671 | putative sensor histidine kinase/response regulator%3B putative protein of chemotactic signal transduction system (ChA-like)       |  | 2.20  | 4.59 | 0.00 |
| ABAYE0672 | conserved hypothetical protein                                                                                                     |  | 1.10  | 2.14 | 0.01 |
| ABAYE0686 | putative nitroreductase                                                                                                            |  | 1.10  | 2.14 | 0.00 |
| ABAYE0689 | putative amino-acid transport protein                                                                                              |  | 0.98  | 1.97 | 0.04 |
| ABAYE0707 | conserved hypothetical protein                                                                                                     |  | -0.94 | 0.52 | 0.01 |
| ABAYE0711 | putative long-chain fatty acid transport protein                                                                                   |  | 1.10  | 2.14 | 0.01 |
| ABAYE0725 | conserved hypothetical protein                                                                                                     |  | 0.74  | 1.67 | 0.04 |
| ABAYE0730 | conserved hypothetical protein%3B putative protein (DcaP-like)                                                                     |  | 1.20  | 2.30 | 0.04 |
| ABAYE0742 | putative oxidoreductase/dehydrogenase                                                                                              |  | -0.53 | 0.69 | 0.05 |
| ABAYE0749 | putative phosphatidylglycerophosphatase B (PgpB)                                                                                   |  | -0.87 | 0.55 | 0.04 |
| ABAYE0760 | conserved hypothetical protein                                                                                                     |  | 0.61  | 1.53 | 0.04 |
| ABAYE0792 | conserved hypothetical protein%3B putative biofilm-associated protein with RTX toxins and related Ca <sup>2+</sup> -binding domain |  | -1.40 | 0.38 | 0.00 |
| ABAYE0797 | putative universal stress protein A (UspA)                                                                                         |  | -1.00 | 0.50 | 0.03 |
| ABAYE0832 | conserved hypothetical protein                                                                                                     |  | -0.64 | 0.64 | 0.05 |



|           |                                                                             |  |       |      |      |
|-----------|-----------------------------------------------------------------------------|--|-------|------|------|
| ABAYE0841 | conserved hypothetical protein                                              |  | 0.92  | 1.89 | 0.04 |
| ABAYE0869 | conserved hypothetical protein%3B putative membrane protein                 |  | -0.90 | 0.54 | 0.02 |
| ABAYE0919 | conserved hypothetical protein                                              |  | 1.50  | 2.83 | 0.00 |
| ABAYE0920 | conserved hypothetical protein%3B putative exported protein                 |  | -0.59 | 0.66 | 0.04 |
| ABAYE0921 | conserved hypothetical protein%3B putative exported protein                 |  | 0.72  | 1.65 | 0.01 |
| ABAYE0952 | conserved hypothetical protein                                              |  | -1.60 | 0.33 | 0.03 |
| ABAYE0971 | conserved hypothetical protein%3B putative exported protein                 |  | -1.20 | 0.44 | 0.03 |
| ABAYE0972 | putative glycosyltransferase                                                |  | -1.20 | 0.44 | 0.01 |
| ABAYE0973 | conserved hypothetical protein                                              |  | -0.70 | 0.62 | 0.03 |
| ABAYE0974 | conserved hypothetical protein%3B putative membrane protein                 |  | -1.20 | 0.44 | 0.01 |
| ABAYE0989 | conserved hypothetical protein                                              |  | -0.57 | 0.67 | 0.03 |
| ABAYE0995 | conserved hypothetical protein                                              |  | 0.72  | 1.65 | 0.02 |
| ABAYE0997 | conserved hypothetical protein                                              |  | 0.58  | 1.49 | 0.04 |
| ABAYE1029 | putative transcriptional regulator (AsnC family)                            |  | 1.30  | 2.46 | 0.04 |
| ABAYE1046 | conserved hypothetical protein%3B putative signal peptide                   |  | 0.84  | 1.79 | 0.02 |
| ABAYE1055 | conserved hypothetical protein                                              |  | 0.81  | 1.75 | 0.02 |
| ABAYE1063 | putative Choline/carnitine/betaine transporter family protein               |  | -0.64 | 0.64 | 0.04 |
| ABAYE1072 | putative Inner membrane protein%3B putative permease of the drug/metabolite |  | 0.93  | 1.91 | 0.02 |

|           |                                                                                                                                                                                                                    |  |       |      |      |
|-----------|--------------------------------------------------------------------------------------------------------------------------------------------------------------------------------------------------------------------|--|-------|------|------|
|           | transporter (DMT) superfamily                                                                                                                                                                                      |  |       |      |      |
| ABAYE1084 | conserved hypothetical protein                                                                                                                                                                                     |  | 1.30  | 2.46 | 0.02 |
| ABAYE1087 | putative non-ribosomal peptide synthetase with condensation and peptidyl carrier protein domains (basB)                                                                                                            |  | 0.67  | 1.59 | 0.01 |
| ABAYE1124 | putative peptidase%3B putative metallopeptidase                                                                                                                                                                    |  | 0.85  | 1.80 | 0.03 |
| ABAYE1135 | conserved hypothetical protein                                                                                                                                                                                     |  | 0.75  | 1.68 | 0.01 |
| ABAYE1145 | putative acyl-CoA dehydrogenase                                                                                                                                                                                    |  | -0.88 | 0.54 | 0.04 |
| ABAYE1148 | conserved hypothetical protein%3B putative signal pepetide                                                                                                                                                         |  | -0.82 | 0.57 | 0.02 |
| ABAYE1160 | putative rare lipoprotein A family (RlpA-like)                                                                                                                                                                     |  | -0.92 | 0.53 | 0.03 |
| ABAYE1167 | conserved hypothetical protein                                                                                                                                                                                     |  | -0.93 | 0.52 | 0.02 |
| ABAYE1189 | fragment of conserved hypothetical protein (part 2)                                                                                                                                                                |  | -0.80 | 0.57 | 0.02 |
| ABAYE1191 | putative secretion pathway ATPase                                                                                                                                                                                  |  | 1.50  | 2.83 | 0.00 |
| ABAYE1201 | conserved hypothetical protein                                                                                                                                                                                     |  | -0.87 | 0.55 | 0.04 |
| ABAYE1207 | bifunctional protein [Includes: putative prephenate or cyclohexadienyl dehydrogenase%3B 3-phosphoshikimate 1-carboxyvinyltransferase (5-enolpyruvylshikimate-3-phosphate synthase) (EPSP synthase) (EPSPS) (AroA)] |  | 0.48  | 1.39 | 0.05 |
| ABAYE1219 | putative cold shock protein                                                                                                                                                                                        |  | -1.30 | 0.41 | 0.01 |
| ABAYE1226 | conserved hypothetical protein                                                                                                                                                                                     |  | -1.20 | 0.44 | 0.05 |
| ABAYE1228 | hypothetical protein                                                                                                                                                                                               |  | -0.67 | 0.63 | 0.03 |

|           |                                                                  |  |       |      |      |
|-----------|------------------------------------------------------------------|--|-------|------|------|
| ABAYE1229 | hypothetical protein%3B putative phage related protein           |  | -0.83 | 0.56 | 0.03 |
| ABAYE1230 | conserved hypothetical protein                                   |  | -0.93 | 0.52 | 0.04 |
| ABAYE1256 | conserved hypothetical protein%3B putative phage related protein |  | -0.71 | 0.61 | 0.04 |
| ABAYE1298 | conserved hypothetical protein                                   |  | -3.40 | 0.09 | 0.01 |
| ABAYE1301 | putative methyltransferase                                       |  | -1.50 | 0.35 | 0.01 |
| ABAYE1303 | conserved hypothetical protein%3B putative signal peptide        |  | -1.30 | 0.41 | 0.01 |
| ABAYE1313 | putative Short-chain dehydrogenase/reductase                     |  | 1.00  | 2.00 | 0.01 |
| ABAYE1327 | conserved hypothetical protein                                   |  | 2.00  | 4.00 | 0.00 |
| ABAYE1345 | conserved hypothetical protein                                   |  | 0.87  | 1.83 | 0.04 |
| ABAYE1347 | conserved hypothetical protein%3B putative membrane protein      |  | 0.90  | 1.87 | 0.05 |
| ABAYE1351 | conserved hypothetical protein%3B putative exported protein      |  | 1.90  | 3.73 | 0.00 |
| ABAYE1355 | putative membrane protein                                        |  | -0.83 | 0.56 | 0.03 |
| ABAYE1372 | fragment of conserved hypothetical protein (partial)             |  | -2.30 | 0.20 | 0.00 |
| ABAYE1376 | conserved hypothetical protein                                   |  | -0.93 | 0.52 | 0.00 |
| ABAYE1379 | conserved hypothetical protein                                   |  | -0.85 | 0.55 | 0.02 |
| ABAYE1395 | hypothetical protein%3B putative biofilm synthesis protein       |  | -1.20 | 0.44 | 0.04 |
| ABAYE1396 | Biofilm synthesis N-glycosyltransferase (PgaC-like)              |  | -1.10 | 0.47 | 0.05 |
| ABAYE1397 | hypothetical protein%3B putative biofilm synthesis protein       |  | -0.69 | 0.62 | 0.05 |

|           |                                                                            |  |       |      |      |
|-----------|----------------------------------------------------------------------------|--|-------|------|------|
| ABAYE1409 | putative binding-protein-dependent transport systems periplasmic component |  | 0.81  | 1.75 | 0.04 |
| ABAYE1426 | conserved hypothetical protein                                             |  | -0.86 | 0.55 | 0.05 |
| ABAYE1429 | conserved hypothetical protein%3B putative exported protein                |  | -0.81 | 0.57 | 0.02 |
| ABAYE1430 | conserved hypothetical protein                                             |  | -0.74 | 0.60 | 0.02 |
| ABAYE1443 | putative acetyltransferase                                                 |  | -1.10 | 0.47 | 0.02 |
| ABAYE1459 | putative transport protein                                                 |  | -1.00 | 0.50 | 0.01 |
| ABAYE1468 | conserved hypothetical protein                                             |  | -2.10 | 0.23 | 0.00 |
| ABAYE1470 | conserved hypothetical protein%3B putative biofilm synthesis protein       |  | -1.50 | 0.35 | 0.03 |
| ABAYE1472 | putative Fimbrial usher protein                                            |  | -1.50 | 0.35 | 0.01 |
| ABAYE1473 | hypothetical protein%3B putative biofilm synthesis domain                  |  | -1.10 | 0.47 | 0.03 |
| ABAYE1474 | putative glutathione S-transferase                                         |  | -1.30 | 0.41 | 0.00 |
| ABAYE1475 | putative short chain dehydrogenase                                         |  | -1.10 | 0.47 | 0.01 |
| ABAYE1476 | putative oxidoreductase%2C short-chain dehydrogenase/reductase family      |  | -0.68 | 0.62 | 0.02 |
| ABAYE1480 | hypothetical protein%3B putative signal peptide                            |  | 1.50  | 2.83 | 0.03 |
| ABAYE1485 | putative transcriptional regulator (TetR family)                           |  | -1.20 | 0.44 | 0.04 |
| ABAYE1488 | hypothetical protein                                                       |  | -2.30 | 0.20 | 0.00 |
| ABAYE1506 | putative transporter transmembrane protein (magnesium transporter)         |  | 1.30  | 2.46 | 0.02 |

|           |                                                                        |  |       |      |      |
|-----------|------------------------------------------------------------------------|--|-------|------|------|
| ABAYE1561 | putative intracellular sulfur oxidation protein (DsrE-like)            |  | -1.80 | 0.29 | 0.00 |
| ABAYE1562 | putative UDP-galactose 4-epimerase (GalE-like)                         |  | -1.00 | 0.50 | 0.02 |
| ABAYE1584 | putative outer membrane protein (OmpH)                                 |  | -0.70 | 0.62 | 0.01 |
| ABAYE1596 | hypothetical protein                                                   |  | -1.10 | 0.47 | 0.01 |
| ABAYE1599 | L-kynurenine hydrolase                                                 |  | 0.80  | 1.74 | 0.04 |
| ABAYE1604 | conserved hypothetical protein                                         |  | -1.20 | 0.44 | 0.02 |
| ABAYE1607 | Putative diguanylate cyclase/phosphodiesterase                         |  | -0.94 | 0.52 | 0.02 |
| ABAYE1611 | conserved hypothetical protein%3B putative signal peptide              |  | 1.60  | 3.03 | 0.01 |
| ABAYE1629 | conserved hypothetical protein                                         |  | -0.83 | 0.56 | 0.02 |
| ABAYE1634 | conserved hypothetical protein%3B putative exported protein            |  | -0.78 | 0.58 | 0.04 |
| ABAYE1648 | putative potassium uptake protein                                      |  | 0.61  | 1.53 | 0.04 |
| ABAYE1671 | putative cell division protein (FtsB-like)                             |  | -0.99 | 0.50 | 0.04 |
| ABAYE1688 | conserved hypothetical protein%3B putative membrane protein            |  | 0.79  | 1.73 | 0.03 |
| ABAYE1703 | conserved hypothetical protein                                         |  | 1.60  | 3.03 | 0.04 |
| ABAYE1705 | putative Aromatic-ring-hydroxylating dioxygenase small subunit         |  | 1.00  | 2.00 | 0.02 |
| ABAYE1706 | putative Short-chain dehydrogenase/reductase                           |  | 0.72  | 1.65 | 0.04 |
| ABAYE1711 | conserved hypothetical protein%3B putative signal peptide              |  | 1.30  | 2.46 | 0.05 |
| ABAYE1713 | putative Penicillin acylase precursor (Penicillin amidase) (Penicillin |  | -0.67 | 0.63 | 0.05 |

|           |                                                                             |  |       |      |      |
|-----------|-----------------------------------------------------------------------------|--|-------|------|------|
|           | amidohydrolase)                                                             |  |       |      |      |
| ABAYE1725 | putative Permease of the major facilitator                                  |  | 0.79  | 1.73 | 0.03 |
| ABAYE1728 | putative NADP-dependent aldehyde dehydrogenase (AldH-like)                  |  | 0.96  | 1.95 | 0.02 |
| ABAYE1735 | conserved hypothetical protein                                              |  | -1.00 | 0.50 | 0.01 |
| ABAYE1736 | putative oxidoreductase%3B putative Metal-binding Oxidoreductase            |  | -1.10 | 0.47 | 0.01 |
| ABAYE1748 | conserved hypothetical protein                                              |  | -1.40 | 0.38 | 0.01 |
| ABAYE1749 | putative Isochorismatase hydrolase                                          |  | -0.77 | 0.59 | 0.01 |
| ABAYE1772 | conserved hypothetical protein%3B putative regucalcin family protein        |  | -0.53 | 0.69 | 0.04 |
| ABAYE1780 | putative NADP-dependent aldehyde dehydrogenase (AldH-like)                  |  | 1.50  | 2.83 | 0.02 |
| ABAYE1781 | putative Dihydroxy-acid and 6-phosphogluconate dehydratase (IlvD-Edd-like ) |  | 1.60  | 3.03 | 0.01 |
| ABAYE1783 | putative transcriptional regulator (LysR family)                            |  | 1.40  | 2.64 | 0.04 |
| ABAYE1785 | putative Permease of the major facilitator%3B putative tartrate transporter |  | 0.77  | 1.71 | 0.04 |
| ABAYE1796 | putative multidrug resistance efflux pump                                   |  | -0.60 | 0.66 | 0.05 |
| ABAYE1807 | putative transcriptional regulator (TetR family)                            |  | -0.91 | 0.53 | 0.03 |
| ABAYE1838 | hypothetical protein                                                        |  | -1.00 | 0.50 | 0.03 |
| ABAYE1843 | putative phage/plasmid replication protein                                  |  | -0.71 | 0.61 | 0.01 |
| ABAYE1846 | hypothetical protein                                                        |  | 0.82  | 1.77 | 0.00 |

|           |                                                                                             |  |       |      |      |
|-----------|---------------------------------------------------------------------------------------------|--|-------|------|------|
| ABAYE1851 | hypothetical protein                                                                        |  | -1.00 | 0.50 | 0.02 |
| ABAYE1853 | putative phage/plasmid replication protein                                                  |  | -0.76 | 0.59 | 0.01 |
| ABAYE1876 | hypothetical protein                                                                        |  | -3.60 | 0.08 | 0.00 |
| ABAYE1886 | conserved hypothetical protein%3B putative 5`-nucleotidase domain                           |  | -0.90 | 0.54 | 0.01 |
| ABAYE1890 | hypothetical protein                                                                        |  | 1.10  | 2.14 | 0.02 |
| ABAYE1901 | conserved hypothetical protein%3B putative exported protein                                 |  | 0.96  | 1.95 | 0.02 |
| ABAYE1907 | putative Permease of the major facilitator superfamily                                      |  | -0.86 | 0.55 | 0.02 |
| ABAYE1916 | putative acetyl-CoA acetyltransferase (Acetoacetyl-CoA thiolase)                            |  | -0.94 | 0.52 | 0.03 |
| ABAYE1929 | putative 4Fe-4S ferredoxin%3B putative Adenylylsulfate OR formate reductase%2C beta subunit |  | 2.10  | 4.29 | 0.03 |
| ABAYE1933 | putative acyl carrier protein phosphodiesterase (ACP phosphodiesterase)                     |  | 1.00  | 2.00 | 0.02 |
| ABAYE1935 | putative transcriptional regulator (AraC family)                                            |  | -0.60 | 0.66 | 0.02 |
| ABAYE1963 | hypothetical protein                                                                        |  | -0.92 | 0.53 | 0.03 |
| ABAYE1969 | hypothetical protein                                                                        |  | 2.70  | 6.50 | 0.01 |
| ABAYE1974 | conserved hypothetical protein%3B putative signal peptide                                   |  | 0.79  | 1.73 | 0.00 |
| ABAYE2000 | conserved hypothetical protein%3B putative membrane protein                                 |  | 1.40  | 2.64 | 0.01 |
| ABAYE2001 | putative ferric siderophore receptor protein                                                |  | 0.58  | 1.49 | 0.04 |
| ABAYE2034 | conserved hypothetical protein%3B putative exported protein                                 |  | 2.10  | 4.29 | 0.00 |

|           |                                                                                                     |  |       |      |      |
|-----------|-----------------------------------------------------------------------------------------------------|--|-------|------|------|
| ABAYE2051 | putative biopolymer transport protein (EXBD-like)                                                   |  | -0.68 | 0.62 | 0.03 |
| ABAYE2063 | conserved hypothetical protein                                                                      |  | 1.00  | 2.00 | 0.04 |
| ABAYE2072 | putative transcriptional regulator                                                                  |  | 0.51  | 1.42 | 0.05 |
| ABAYE2079 | putative biopolymer transport protein (EXBD-like)                                                   |  | 1.20  | 2.30 | 0.01 |
| ABAYE2080 | putative biopolymer transport protein (EXBB-like)                                                   |  | 1.20  | 2.30 | 0.00 |
| ABAYE2109 | conserved hypothetical protein                                                                      |  | 0.75  | 1.68 | 0.04 |
| ABAYE2120 | conserved hypothetical protein                                                                      |  | -1.80 | 0.29 | 0.03 |
| ABAYE2132 | putative fimbrial protein precursor (Pilin)                                                         |  | 1.10  | 2.14 | 0.04 |
| ABAYE2133 | putative pilin chaperone                                                                            |  | 1.10  | 2.14 | 0.01 |
| ABAYE2137 | fragment of putative outer membrane usher protein (part 2)                                          |  | -1.10 | 0.47 | 0.04 |
| ABAYE2140 | hypothetical protein%3B putative exported protein                                                   |  | 0.69  | 1.61 | 0.04 |
| ABAYE2146 | conserved hypothetical protein%3B putative membrane protein                                         |  | -1.10 | 0.47 | 0.01 |
| ABAYE2171 | putative GTP-binding protein                                                                        |  | -0.79 | 0.58 | 0.02 |
| ABAYE2174 | conserved hypothetical protein%3B putative exported protein                                         |  | -1.30 | 0.41 | 0.02 |
| ABAYE2178 | conserved hypothetical protein                                                                      |  | -0.61 | 0.66 | 0.03 |
| ABAYE2246 | putative Short-chain dehydrogenase/reductase%3B putative 3-oxoacyl-[acyl-carrier-protein] reductase |  | 1.10  | 2.14 | 0.03 |
| ABAYE2267 | hypothetical protein                                                                                |  | -2.20 | 0.22 | 0.00 |



|           |                                                              |  |       |      |      |
|-----------|--------------------------------------------------------------|--|-------|------|------|
| ABAYE2269 | putative Short-chain dehydrogenase/reductase                 |  | -2.30 | 0.20 | 0.01 |
| ABAYE2273 | hypothetical protein                                         |  | -3.80 | 0.07 | 0.00 |
| ABAYE2274 | hypothetical protein                                         |  | -3.10 | 0.12 | 0.00 |
| ABAYE2277 | hypothetical protein%3B putative exported protein            |  | -3.10 | 0.12 | 0.02 |
| ABAYE2295 | conserved hypothetical protein                               |  | 1.20  | 2.30 | 0.03 |
| ABAYE2297 | conserved hypothetical protein                               |  | 1.70  | 3.25 | 0.01 |
| ABAYE2298 | putative transport protein (MFS superfamily)                 |  | 0.63  | 1.55 | 0.03 |
| ABAYE2323 | putative transcriptional regulator (GntR family)             |  | 0.93  | 1.91 | 0.00 |
| ABAYE2333 | putative aldehyde dehydrogenase                              |  | 0.96  | 1.95 | 0.02 |
| ABAYE2334 | conserved hypothetical protein                               |  | 1.20  | 2.30 | 0.01 |
| ABAYE2335 | conserved hypothetical protein                               |  | 0.79  | 1.73 | 0.04 |
| ABAYE2336 | conserved hypothetical protein                               |  | 1.20  | 2.30 | 0.04 |
| ABAYE2347 | fragment of putative transcriptional regulator (TetR family) |  | -0.61 | 0.66 | 0.04 |
| ABAYE2350 | transposase of ISAbal%2C IS4 family (ORF 1)                  |  | -0.49 | 0.71 | 0.05 |
| ABAYE2351 | transposase of ISAbal%2C IS4 family (ORF 2)                  |  | -0.51 | 0.70 | 0.04 |
| ABAYE2362 | hypothetical protein%3B putative endonuclease                |  | 0.80  | 1.74 | 0.01 |
| ABAYE2382 | putative oxidoreductase                                      |  | 0.64  | 1.56 | 0.03 |
| ABAYE2389 | conserved hypothetical protein%3B putative exported protein  |  | -0.81 | 0.57 | 0.02 |

|           |                                                                           |  |       |      |      |
|-----------|---------------------------------------------------------------------------|--|-------|------|------|
| ABAYE2407 | conserved hypothetical protein                                            |  | 0.82  | 1.77 | 0.01 |
| ABAYE2429 | conserved hypothetical protein                                            |  | 1.40  | 2.64 | 0.01 |
| ABAYE2430 | conserved hypothetical protein                                            |  | 1.40  | 2.64 | 0.01 |
| ABAYE2436 | conserved hypothetical protein                                            |  | -0.87 | 0.55 | 0.03 |
| ABAYE2459 | hypothetical protein                                                      |  | -0.91 | 0.53 | 0.02 |
| ABAYE2465 | putative Permease of the major facilitator superfamily                    |  | -1.10 | 0.47 | 0.00 |
| ABAYE2475 | putative transcriptional regulator (AsnC family)                          |  | 0.82  | 1.77 | 0.04 |
| ABAYE2487 | putative outer membrane efflux protein%2C type I secretion protein        |  | 0.61  | 1.53 | 0.04 |
| ABAYE2497 | hypothetical protein                                                      |  | 0.75  | 1.68 | 0.04 |
| ABAYE2508 | conserved hypothetical protein                                            |  | 1.10  | 2.14 | 0.03 |
| ABAYE2510 | conserved hypothetical protein                                            |  | -1.10 | 0.47 | 0.03 |
| ABAYE2514 | conserved hypothetical protein                                            |  | -0.90 | 0.54 | 0.01 |
| ABAYE2521 | hypothetical protein                                                      |  | -1.20 | 0.44 | 0.02 |
| ABAYE2525 | hypothetical protein%3B putative exported protein                         |  | -0.93 | 0.52 | 0.01 |
| ABAYE2526 | putative transcriptional regulator                                        |  | 1.20  | 2.30 | 0.02 |
| ABAYE2536 | conserved hypothetical protein%3B putative Amino acid efflux-like protein |  | 0.62  | 1.54 | 0.04 |
| ABAYE2539 | hypothetical protein                                                      |  | 0.58  | 1.49 | 0.05 |

|           |                                                                      |  |       |      |      |
|-----------|----------------------------------------------------------------------|--|-------|------|------|
| ABAYE2546 | conserved hypothetical protein                                       |  | -0.59 | 0.66 | 0.03 |
| ABAYE2548 | conserved hypothetical protein                                       |  | -2.10 | 0.23 | 0.01 |
| ABAYE2569 | conserved hypothetical protein%3B putative exported protein          |  | -1.30 | 0.41 | 0.04 |
| ABAYE2611 | putative transcriptional regulator (TetR/AcrR family)                |  | 1.20  | 2.30 | 0.03 |
| ABAYE2617 | putative flavin-binding monooxygenase                                |  | -1.40 | 0.38 | 0.03 |
| ABAYE2619 | putative Acetyl esterase                                             |  | 0.82  | 1.77 | 0.01 |
| ABAYE2620 | putative Cholesterol oxidase                                         |  | -0.71 | 0.61 | 0.03 |
| ABAYE2633 | conserved hypothetical protein%3B putative exported protein          |  | 1.70  | 3.25 | 0.00 |
| ABAYE2634 | conserved hypothetical protein                                       |  | 1.70  | 3.25 | 0.04 |
| ABAYE2651 | hypothetical protein%3B putative membrane protein                    |  | -1.30 | 0.41 | 0.04 |
| ABAYE2652 | hypothetical protein%3B putative Rhs family protein                  |  | -1.10 | 0.47 | 0.01 |
| ABAYE2654 | hypothetical protein%3B putative exported protein                    |  | 1.00  | 2.00 | 0.02 |
| ABAYE2655 | conserved hypothetical protein%3B putative exported protein          |  | -0.61 | 0.66 | 0.04 |
| ABAYE2665 | conserved hypothetical protein                                       |  | 1.80  | 3.48 | 0.01 |
| ABAYE2669 | conserved hypothetical protein                                       |  | 0.84  | 1.79 | 0.00 |
| ABAYE2671 | conserved hypothetical protein%3B putative haemocin immunity protein |  | 0.64  | 1.56 | 0.05 |
| ABAYE2689 | conserved hypothetical protein                                       |  | -1.80 | 0.29 | 0.02 |
| ABAYE2695 | hypothetical protein%3B putative acetyltransferase%2C GNAT family    |  | -0.84 | 0.56 | 0.02 |

|           |                                                                                      |  |       |      |      |
|-----------|--------------------------------------------------------------------------------------|--|-------|------|------|
| ABAYE2698 | putative bacteriophage protein                                                       |  | -1.30 | 0.41 | 0.03 |
| ABAYE2701 | conserved hypothetical protein from bacteriophage                                    |  | -0.73 | 0.60 | 0.04 |
| ABAYE2703 | hypothetical protein                                                                 |  | -1.90 | 0.27 | 0.03 |
| ABAYE2713 | conserved hypothetical protein                                                       |  | -2.60 | 0.16 | 0.02 |
| ABAYE2727 | conserved hypothetical protein                                                       |  | -1.20 | 0.44 | 0.01 |
| ABAYE2732 | conserved hypothetical protein                                                       |  | -0.97 | 0.51 | 0.02 |
| ABAYE2738 | hypothetical protein                                                                 |  | -1.20 | 0.44 | 0.04 |
| ABAYE2741 | conserved hypothetical protein                                                       |  | -1.20 | 0.44 | 0.02 |
| ABAYE2757 | conserved hypothetical protein%3B putative signal peptide                            |  | -1.30 | 0.41 | 0.03 |
| ABAYE2782 | putative lipoprotein                                                                 |  | -1.50 | 0.35 | 0.00 |
| ABAYE2792 | conserved hypothetical protein                                                       |  | 1.00  | 2.00 | 0.01 |
| ABAYE2800 | putative hydrolase (EstB)                                                            |  | 0.56  | 1.47 | 0.03 |
| ABAYE2813 | putative membrane-bound protein in GNT I transport system (GntY)                     |  | 1.10  | 2.14 | 0.00 |
| ABAYE2817 | conserved hypothetical protein%3B putative lipoprotein precursor                     |  | -2.00 | 0.25 | 0.00 |
| ABAYE2821 | conserved hypothetical protein                                                       |  | 1.30  | 2.46 | 0.00 |
| ABAYE2823 | putative transketolase C-terminal section                                            |  | 1.10  | 2.14 | 0.01 |
| ABAYE2824 | putative transketolase N-terminal section                                            |  | 1.30  | 2.46 | 0.05 |
| ABAYE2826 | putative 3-oxoacyl-[acyl-carrier-protein] reductase (3-ketoacyl-acyl carrier protein |  | 0.78  | 1.72 | 0.03 |

|           |                                                                      |  |       |      |      |
|-----------|----------------------------------------------------------------------|--|-------|------|------|
|           | reductase)                                                           |  |       |      |      |
| ABAYE2836 | putative acetolactate synthase (IlvB-like)                           |  | 0.64  | 1.56 | 0.03 |
| ABAYE2837 | putative aldehyde dehydrogenase                                      |  | 1.20  | 2.30 | 0.02 |
| ABAYE2838 | putative L-aspartate dehydrogenase (NadX)                            |  | 1.30  | 2.46 | 0.03 |
| ABAYE2839 | putative short-chain dehydrogenase                                   |  | 1.40  | 2.64 | 0.00 |
| ABAYE2842 | putative permease (MFS superfamily)                                  |  | 0.47  | 1.39 | 0.04 |
| ABAYE2843 | putative ferredoxin reductase component (dioxygenase)                |  | 1.30  | 2.46 | 0.04 |
| ABAYE2847 | conserved hypothetical protein                                       |  | 1.50  | 2.83 | 0.04 |
| ABAYE2850 | conserved hypothetical protein                                       |  | -0.98 | 0.51 | 0.02 |
| ABAYE2871 | putative homocysteine S-methyltransferase family protein             |  | 1.10  | 2.14 | 0.04 |
| ABAYE2881 | hypothetical protein                                                 |  | -0.81 | 0.57 | 0.02 |
| ABAYE2891 | hypothetical protein%3B putative membrane protein from bacteriophage |  | -1.10 | 0.47 | 0.01 |
| ABAYE2895 | hypothetical protein from bacteriophage                              |  | -1.70 | 0.31 | 0.04 |
| ABAYE2896 | hypothetical protein from bacteriophage                              |  | -2.90 | 0.13 | 0.00 |
| ABAYE2897 | hypothetical protein from bacteriophage                              |  | -2.60 | 0.16 | 0.03 |
| ABAYE2903 | hypothetical protein from bacteriophage                              |  | -0.74 | 0.60 | 0.04 |
| ABAYE2925 | putative glutamine amidotransferase                                  |  | 0.59  | 1.51 | 0.03 |
| ABAYE2942 | putative arginine-tRNA-protein transferase                           |  | 0.84  | 1.79 | 0.05 |

|           |                                                                 |  |       |      |      |
|-----------|-----------------------------------------------------------------|--|-------|------|------|
| ABAYE2959 | fragment of putative dioxygenase alpha subunit (part 2)         |  | -0.93 | 0.52 | 0.03 |
| ABAYE2962 | putative Lipase                                                 |  | 1.30  | 2.46 | 0.01 |
| ABAYE2985 | conserved hypothetical protein%3B putative exported protein     |  | -0.56 | 0.68 | 0.03 |
| ABAYE2988 | putative hydrolase                                              |  | 0.56  | 1.47 | 0.05 |
| ABAYE2990 | conserved hypothetical protein                                  |  | -1.20 | 0.44 | 0.00 |
| ABAYE3005 | putative carboxylesterase%2C biotin biosynthesis (BioH)         |  | -0.58 | 0.67 | 0.04 |
| ABAYE3008 | putative transport protein (permease)                           |  | -1.40 | 0.38 | 0.01 |
| ABAYE3013 | putative transcriptional regulator (GntR-family)                |  | 1.10  | 2.14 | 0.00 |
| ABAYE3030 | conserved hypothetical protein                                  |  | -1.60 | 0.33 | 0.00 |
| ABAYE3032 | conserved hypothetical protein%3B putative exported protein     |  | -0.93 | 0.52 | 0.05 |
| ABAYE3036 | putative multidrug resistance efflux pump                       |  | 0.97  | 1.96 | 0.04 |
| ABAYE3040 | conserved hypothetical protein%3B putative membrane protein     |  | -1.80 | 0.29 | 0.01 |
| ABAYE3041 | conserved hypothetical protein                                  |  | -2.50 | 0.18 | 0.00 |
| ABAYE3068 | putative outermembrane protein exposed to the bacterial surface |  | -0.74 | 0.60 | 0.02 |
| ABAYE3069 | conserved hypothetical protein                                  |  | 0.53  | 1.44 | 0.03 |
| ABAYE3072 | hypothetical protein                                            |  | 0.76  | 1.69 | 0.04 |
| ABAYE3074 | hypothetical protein%3B putative membrane protein               |  | 2.20  | 4.59 | 0.00 |
| ABAYE3080 | conserved hypothetical protein                                  |  | 0.71  | 1.64 | 0.05 |

|           |                                                             |  |       |      |      |
|-----------|-------------------------------------------------------------|--|-------|------|------|
| ABAYE3082 | putative transcriptional regulator (LysR family)            |  | 1.30  | 2.46 | 0.05 |
| ABAYE3120 | conserved hypothetical protein                              |  | 1.50  | 2.83 | 0.03 |
| ABAYE3122 | putative MutT/nudix family protein                          |  | 0.89  | 1.85 | 0.04 |
| ABAYE3125 | putative pilus assembly protein (FilD)                      |  | 0.70  | 1.62 | 0.03 |
| ABAYE3127 | putative pilus assembly protein (FilB)                      |  | 0.93  | 1.91 | 0.05 |
| ABAYE3135 | putative sigma(54) modulation protein RpoX                  |  | -2.00 | 0.25 | 0.00 |
| ABAYE3165 | putative transporter                                        |  | -0.78 | 0.58 | 0.02 |
| ABAYE3167 | putative glutathione S-transferase                          |  | 0.92  | 1.89 | 0.02 |
| ABAYE3212 | hypothetical protein%3B putative exported protein           |  | -2.00 | 0.25 | 0.02 |
| ABAYE3235 | putative transcriptional regulator (TetR family)            |  | -1.00 | 0.50 | 0.03 |
| ABAYE3290 | putative ferric siderophore receptor protein                |  | 0.63  | 1.55 | 0.02 |
| ABAYE3309 | conserved hypothetical protein                              |  | -0.71 | 0.61 | 0.03 |
| ABAYE3310 | conserved hypothetical protein                              |  | 0.95  | 1.93 | 0.04 |
| ABAYE3333 | conserved hypothetical protein%3B putative membrane protein |  | -1.20 | 0.44 | 0.02 |
| ABAYE3339 | putative Zn-dependent oxidoreductase                        |  | 0.71  | 1.64 | 0.03 |
| ABAYE3342 | putative transporter protein                                |  | 0.47  | 1.39 | 0.04 |
| ABAYE3350 | conserved hypothetical protein                              |  | 1.90  | 3.73 | 0.00 |
| ABAYE3370 | conserved hypothetical protein%3B putative membrane protein |  | 0.90  | 1.87 | 0.04 |

|           |                                                             |  |       |      |      |
|-----------|-------------------------------------------------------------|--|-------|------|------|
| ABAYE3386 | putative type III effector HopPmaJ                          |  | 1.20  | 2.30 | 0.00 |
| ABAYE3425 | conserved hypothetical protein                              |  | -0.82 | 0.57 | 0.03 |
| ABAYE3457 | conserved hypothetical protein                              |  | 0.85  | 1.80 | 0.01 |
| ABAYE3473 | conserved hypothetical protein%3B putative signal peptide   |  | -0.91 | 0.53 | 0.05 |
| ABAYE3475 | conserved hypothetical protein%3B putative exported protein |  | -0.83 | 0.56 | 0.02 |
| ABAYE3485 | conserved hypothetical protein                              |  | 0.91  | 1.88 | 0.01 |
| ABAYE3487 | conserved hypothetical protein%3B putative exported protein |  | -0.89 | 0.54 | 0.04 |
| ABAYE3503 | putative DNA binding protein                                |  | -1.10 | 0.47 | 0.00 |
| ABAYE3522 | putative glutamyl t-RNA synthetase                          |  | -0.62 | 0.65 | 0.03 |
| ABAYE3525 | conserved hypothetical protein%3B putative exported protein |  | -0.91 | 0.53 | 0.01 |
| ABAYE3561 | fragment of conjugal transfer protein trbI                  |  | -0.71 | 0.61 | 0.05 |
| ABAYE3599 | putative Relaxase/helicase                                  |  | -1.50 | 0.35 | 0.01 |
| ABAYE3602 | fragment of conserved hypothetical protein (part 2)         |  | 0.85  | 1.80 | 0.02 |
| ABAYE3615 | putative transposase                                        |  | 0.53  | 1.44 | 0.03 |
| ABAYE3667 | conserved hypothetical protein                              |  | 0.93  | 1.91 | 0.04 |
| ABAYE3674 | putative outer membrane protein                             |  | 1.40  | 2.64 | 0.01 |
| ABAYE3676 | conserved hypothetical protein%3B putative membrane protein |  | 0.79  | 1.73 | 0.01 |
| ABAYE3695 | conserved hypothetical protein                              |  | -0.72 | 0.61 | 0.02 |



|           |                                                                                |  |       |      |      |
|-----------|--------------------------------------------------------------------------------|--|-------|------|------|
| ABAYE3702 | fragment of conserved hypothetical protein (partial)                           |  | -1.60 | 0.33 | 0.00 |
| ABAYE3706 | conserved hypothetical protein%3B putative exported protein                    |  | 2.40  | 5.28 | 0.00 |
| ABAYE3707 | putative Rossmann-fold nucleotide-binding protein involved in DNA uptake (Smf) |  | 1.70  | 3.25 | 0.01 |
| ABAYE3708 | putative ribosome maturation factor (dsRNA-binding protein) (RimN)             |  | 0.65  | 1.57 | 0.02 |
| ABAYE3711 | putative transporter (MFS superfamily)                                         |  | 0.62  | 1.54 | 0.03 |
| ABAYE3736 | conserved hypothetical protein                                                 |  | 0.93  | 1.91 | 0.03 |
| ABAYE3744 | putative membrane protein                                                      |  | 0.92  | 1.89 | 0.01 |
| ABAYE3763 | putative enoyl-CoA hydratase/isomerase family protein                          |  | 1.10  | 2.14 | 0.03 |
| ABAYE3765 | putative acyl-CoA dehydrogenase                                                |  | 1.70  | 3.25 | 0.04 |
| ABAYE3776 | conserved hypothetical protein%3B putative membrane protein                    |  | 0.65  | 1.57 | 0.03 |
| ABAYE3777 | putative ferric siderophore receptor protein                                   |  | 0.62  | 1.54 | 0.03 |
| ABAYE3782 | hypothetical protein                                                           |  | -1.10 | 0.47 | 0.00 |
| ABAYE3794 | putative transcriptional regulator (GntR family)                               |  | 0.94  | 1.92 | 0.02 |
| ABAYE3807 | putative acetyltransferase (Weel)                                              |  | 0.82  | 1.77 | 0.04 |
| ABAYE3810 | conserved hypothetical protein%3B putative polysaccharide polymerase           |  | 0.94  | 1.92 | 0.01 |
| ABAYE3824 | fragment of conserved hypothetical protein (partial)                           |  | -0.66 | 0.63 | 0.03 |
| ABAYE3856 | conserved hypothetical protein                                                 |  | -1.20 | 0.44 | 0.01 |

|                 |                                                                                                                |  |       |      |      |
|-----------------|----------------------------------------------------------------------------------------------------------------|--|-------|------|------|
| ABAYE3860       | Conserved hypothetical protein%3B putative signal peptide                                                      |  | -1.50 | 0.35 | 0.00 |
| ABAYE3866       | hypothetical protein%3B putative peptidase M10A and M12B%2C matrixin and adamalysin%3B putative signal peptide |  | -0.84 | 0.56 | 0.03 |
| ABAYE3868       | conserved hypothetical protein                                                                                 |  | -1.60 | 0.33 | 0.01 |
| ABAYE3874       | conserved hypothetical protein%3B putative membrane protein                                                    |  | 0.65  | 1.57 | 0.04 |
| ABAYE3888       | conserved hypothetical protein%3B putative membrane protein                                                    |  | -1.60 | 0.33 | 0.03 |
| ABAYE3889       | putative thiol:disulfide interchange protein                                                                   |  | -1.00 | 0.50 | 0.00 |
| ABAYEmisc_RNA_9 |                                                                                                                |  | 0.74  | 1.67 | 0.01 |
| ABAYEtRNA17     | ABAYEtRNA17                                                                                                    |  | 0.89  | 1.85 | 0.02 |
| ABAYEtRNA20     | ABAYEtRNA20                                                                                                    |  | -2.10 | 0.23 | 0.00 |
| ABAYEtRNA21     | ABAYEtRNA21                                                                                                    |  | 1.30  | 2.46 | 0.02 |
| ABAYEtRNA23     | ABAYEtRNA23                                                                                                    |  | -2.10 | 0.23 | 0.00 |
| ABAYEtRNA25     | ABAYEtRNA25                                                                                                    |  | -2.20 | 0.22 | 0.00 |
| ABAYEtRNA41     | ABAYEtRNA41                                                                                                    |  | 1.60  | 3.03 | 0.00 |
| ABAYEtRNA43     | ABAYEtRNA43                                                                                                    |  | 0.96  | 1.95 | 0.01 |
| ABAYEtRNA45     | ABAYEtRNA45                                                                                                    |  | 1.50  | 2.83 | 0.01 |
| ABAYEtRNA46     | ABAYEtRNA46                                                                                                    |  | -1.20 | 0.44 | 0.01 |
| ABAYEtRNA51     | ABAYEtRNA51                                                                                                    |  | 0.90  | 1.87 | 0.01 |

|             |             |  |       |      |      |
|-------------|-------------|--|-------|------|------|
| ABAYEtRNA54 | ABAYEtRNA54 |  | 0.92  | 1.89 | 0.01 |
| ABAYEtRNA57 | ABAYEtRNA57 |  | -2.40 | 0.19 | 0.00 |
| ABAYEtRNA6  | ABAYEtRNA6  |  | -1.30 | 0.41 | 0.02 |
| ABAYEtRNA63 | ABAYEtRNA63 |  | -3.00 | 0.13 | 0.00 |
| ABAYEtRNA7  | ABAYEtRNA7  |  | -1.40 | 0.38 | 0.01 |
| ABAYEtRNA8  | ABAYEtRNA8  |  | -1.30 | 0.41 | 0.01 |
