# Supplementary material for: The Acinetobacter baumannii Two-Component System AdeRS Regulates Genes Required for Multidrug Efflux, Biofilm Formation, and Virulence in a Strain-Specific Manner
Source: PubMed Central journal article supplement (PMC4850262; doi:10.1128/mbio.00430-16), 2016-04-19
Supplement: mbo002162774st2.pdf [file mbo002162774st2.pdf]

**Table S2** Gene expression data from the complete transcriptome analysis of *A. baumannii* AYE by RNA-Seq, showing differentially expressed genes ( $P < 0.05$ ) in AYE $\Delta$ *adeB* compared with AYE.

| ABAYE Gene ID | Annotation                                                                 | Gene Name | log2 Fold Change | Fold Change | P.Value |
|---------------|----------------------------------------------------------------------------|-----------|------------------|-------------|---------|
| ABAYE_16s_1   | ABAYE_16s_1                                                                |           | 1.10             | 2.14        | 0.00    |
| ABAYE_16s_2   | ABAYE_16s_2                                                                |           | 1.10             | 2.14        | 0.00    |
| ABAYE_16s_3   | ABAYE_16s_3                                                                |           | 1.20             | 2.30        | 0.00    |
| ABAYE_16s_4   | ABAYE_16s_4                                                                |           | 1.10             | 2.14        | 0.01    |
| ABAYE_16s_5   | ABAYE_16s_5                                                                |           | 1.10             | 2.14        | 0.01    |
| ABAYE_16s_6   | ABAYE_16s_6                                                                |           | 1.20             | 2.30        | 0.00    |
| ABAYE_23s_1   | ABAYE_23s_1                                                                |           | 0.73             | 1.66        | 0.00    |
| ABAYE_23s_2   | ABAYE_23s_2                                                                |           | 0.72             | 1.65        | 0.00    |
| ABAYE_23s_3   | ABAYE_23s_3                                                                |           | 0.64             | 1.56        | 0.01    |
| ABAYE_23s_4   | ABAYE_23s_4                                                                |           | 0.81             | 1.75        | 0.00    |
| ABAYE_23s_5   | ABAYE_23s_5                                                                |           | 0.63             | 1.55        | 0.01    |
| ABAYE_23s_6   | ABAYE_23s_6                                                                |           | 0.81             | 1.75        | 0.00    |
| ABAYE0009     | putative RND type efflux pump involved in aminoglycoside resistance (AdeT) | adeT      | 0.48             | 1.39        | 0.04    |

|           |                                                                            |      |       |      |      |
|-----------|----------------------------------------------------------------------------|------|-------|------|------|
| ABAYE0016 | putative glutathione S-transferase                                         |      | -0.62 | 0.65 | 0.02 |
| ABAYE0038 | putative transport protein (MFS superfamily)                               |      | 0.94  | 1.92 | 0.00 |
| ABAYE0039 | aldehyde reductase                                                         | alrA | 0.98  | 1.97 | 0.00 |
| ABAYE0041 | conserved hypothetical protein                                             |      | -0.81 | 0.57 | 0.00 |
| ABAYE0050 | conserved hypothetical protein%3B putative exported protein                |      | 1.30  | 2.46 | 0.00 |
| ABAYE0052 | putative PQQ-dependent aldose sugar dehydrogenase precursor                |      | 0.41  | 1.33 | 0.04 |
| ABAYE0064 | 4-hydroxyphenylpyruvate dioxygenase (4HPPD)(HPPDase)                       | hpd  | -0.34 | 0.79 | 0.05 |
| ABAYE0066 | putative homogentisate 1%2C2-dioxygenase                                   |      | -0.51 | 0.70 | 0.01 |
| ABAYE0067 | maleylacetoacetate isomerase (MAAI)                                        | hmgC | -0.45 | 0.73 | 0.04 |
| ABAYE0068 | fumarylacetoacetase (Fumarylacetoacetate hydrolase)                        | hmgB | -0.57 | 0.67 | 0.03 |
| ABAYE0069 | aromatic amino acid transporter (APC family)                               | aroP | -0.56 | 0.68 | 0.02 |
| ABAYE0071 | putative regulatory protein (nitrile hydratase activator like)             |      | 0.73  | 1.66 | 0.01 |
| ABAYE0080 | conserved hypothetical protein%3B putative signal peptide                  |      | -0.59 | 0.66 | 0.05 |
| ABAYE0081 | putative hydrolase                                                         |      | -0.57 | 0.67 | 0.04 |
| ABAYE0082 | putative glutamate racemase                                                |      | -0.82 | 0.57 | 0.01 |
| ABAYE0085 | conserved hypothetical protein%3B putative two-component regulatory system |      | -0.62 | 0.65 | 0.00 |
| ABAYE0086 | conserved hypothetical protein                                             |      | -0.73 | 0.60 | 0.00 |
| ABAYE0088 | hypothetical protein                                                       |      | -0.69 | 0.62 | 0.03 |

|           |                                                                                                                                                                                  |      |       |      |      |
|-----------|----------------------------------------------------------------------------------------------------------------------------------------------------------------------------------|------|-------|------|------|
| ABAYE0089 | glucosamine--fructose-6-phosphate aminotransferase                                                                                                                               | glmS | 0.36  | 1.28 | 0.01 |
| ABAYE0090 | bifunctional protein [Includes: UDP-N-acetylglucosamine pyrophosphorylase (N-acetylglucosamine-1-phosphate uridylyltransferase)%3B Glucosamine-1-phosphate N-acetyltransferase ] | glmU | 0.45  | 1.37 | 0.03 |
| ABAYE0091 | phosphatidylglycerophosphatase A                                                                                                                                                 | pgpA | 0.53  | 1.44 | 0.01 |
| ABAYE0105 | conserved hypothetical protein%3B putative secretory lipase precursor                                                                                                            |      | -0.56 | 0.68 | 0.04 |
| ABAYE0111 | putative aminotransferase                                                                                                                                                        |      | 0.40  | 1.32 | 0.01 |
| ABAYE0112 | conserved hypothetical protein                                                                                                                                                   |      | 0.45  | 1.37 | 0.00 |
| ABAYE0113 | conserved hypothetical protein%3B putative exported protein                                                                                                                      |      | 0.48  | 1.39 | 0.00 |
| ABAYE0115 | conserved hypothetical protein                                                                                                                                                   |      | 0.40  | 1.32 | 0.03 |
| ABAYE0118 | conserved hypothetical protein                                                                                                                                                   |      | -0.42 | 0.75 | 0.05 |
| ABAYE0119 | hypothetical protein                                                                                                                                                             |      | -0.78 | 0.58 | 0.00 |
| ABAYE0121 | hypothetical protein%3B putative signal peptide                                                                                                                                  |      | -0.59 | 0.66 | 0.01 |
| ABAYE0123 | hypothetical protein%3B putative signal peptide                                                                                                                                  |      | -0.85 | 0.55 | 0.02 |
| ABAYE0127 | ureidoglycolate amidohydrolase(decarboxylating)                                                                                                                                  | allA | -0.37 | 0.77 | 0.02 |
| ABAYE0129 | putative flavoprotein monooxygenase acting on aromatic compound                                                                                                                  |      | 0.47  | 1.39 | 0.01 |
| ABAYE0146 | conserved hypothetical protein                                                                                                                                                   |      | -0.50 | 0.71 | 0.00 |
| ABAYE0148 | UDP-N-acetylglucosamine:N-acetylmuramyl-(pentapeptide) pyrophosphoryl-undecaprenol N-acetylglucosamine transferase                                                               | murG | 0.33  | 1.26 | 0.02 |

|           |                                                                                            |      |       |      |      |
|-----------|--------------------------------------------------------------------------------------------|------|-------|------|------|
| ABAYE0149 | UDP-N-acetylmuramate--alanine ligase                                                       | murC | 0.34  | 1.27 | 0.01 |
| ABAYE0158 | dihydrolipoamide S-acetyltransferase%2C E2 component of the pyruvate dehydrogenase complex | aceF | -0.24 | 0.85 | 0.05 |
| ABAYE0164 | conserved hypothetical protein%3B putative enzyme                                          |      | -2.80 | 0.14 | 0.00 |
| ABAYE0165 | putative ferredoxin                                                                        |      | -1.60 | 0.33 | 0.00 |
| ABAYE0168 | pyridoxamine 5-phosphate oxidase (acts also on pyridoxine phosphate and pyridoxine)        | pdxH | 0.35  | 1.27 | 0.01 |
| ABAYE0170 | conserved hypothetical protein%3B putative exported protein                                |      | 1.30  | 2.46 | 0.00 |
| ABAYE0173 | putative transcriptional regulator (ArsR family)                                           |      | 0.34  | 1.27 | 0.04 |
| ABAYE0174 | xenobiotic reductase                                                                       | xenB | 0.47  | 1.39 | 0.00 |
| ABAYE0175 | 3-deoxy-D-manno-2-octulosonate transferase                                                 | kdtA | 0.36  | 1.28 | 0.01 |
| ABAYE0176 | conserved hypothetical protein                                                             |      | 0.49  | 1.40 | 0.00 |
| ABAYE0182 | putative sulfonate monooxygenase (MsuD)                                                    |      | 0.65  | 1.57 | 0.01 |
| ABAYE0190 | putative high affinity choline transport protein (Bet-like)                                |      | 0.61  | 1.53 | 0.00 |
| ABAYE0191 | conserved hypothetical protein%3B putative exported protein                                |      | -0.46 | 0.73 | 0.02 |
| ABAYE0192 | transposase of ISAbal1%2C IS4 family (ORF 2)                                               |      | -0.63 | 0.65 | 0.03 |
| ABAYE0193 | transposase of ISAbal1%2C IS4 family (ORF 1)                                               |      | -0.60 | 0.66 | 0.00 |
| ABAYE0199 | membrane protein required for efficient alginate biosynthesis                              | glpM | 0.64  | 1.56 | 0.01 |
| ABAYE0202 | putative transport protein (MFS superfamily)                                               |      | -0.35 | 0.78 | 0.01 |

|           |                                                                                          |      |       |       |      |
|-----------|------------------------------------------------------------------------------------------|------|-------|-------|------|
| ABAYE0203 | ssDNA-binding protein controls activity of RecBCD nuclease                               | ssb  | -0.34 | 0.79  | 0.02 |
| ABAYE0212 | putative hydrolase%2C isochorismatase family                                             |      | 0.73  | 1.66  | 0.00 |
| ABAYE0216 | conserved hypothetical protein%3B putative glutathione-dependent formaldehyde-activating |      | 0.31  | 1.24  | 0.03 |
| ABAYE0227 | conserved hypothetical protein                                                           |      | -0.80 | 0.57  | 0.01 |
| ABAYE0228 | hypothetical protein                                                                     |      | -1.50 | 0.35  | 0.00 |
| ABAYE0235 | conserved hypothetical protein%3B putative signal peptide                                |      | 3.20  | 9.19  | 0.00 |
| ABAYE0252 | conserved hypothetical protein%3B putative membrane protein                              |      | -1.20 | 0.44  | 0.00 |
| ABAYE0262 | putative sulfate permease                                                                |      | 4.70  | 25.99 | 0.00 |
| ABAYE0264 | homocysteine synthase                                                                    | metY | -0.34 | 0.79  | 0.02 |
| ABAYE0266 | conserved hypothetical protein%3B putative signal peptide                                |      | -2.00 | 0.25  | 0.00 |
| ABAYE0275 | conserved hypothetical protein                                                           |      | -0.74 | 0.60  | 0.00 |
| ABAYE0278 | conserved hypothetical protein%3B putative exported protein                              |      | -0.61 | 0.66  | 0.02 |
| ABAYE0279 | sulfate transport protein (ABC superfamily%2C peri_bind)                                 | sbp  | -0.69 | 0.62  | 0.00 |
| ABAYE0290 | putative membrane protein (ComM)                                                         |      | -2.60 | 0.16  | 0.00 |
| ABAYE0291 | putative membrane protein (ComN)                                                         |      | -3.30 | 0.10  | 0.00 |
| ABAYE0292 | putative membrane protein (ComO)                                                         |      | -3.00 | 0.13  | 0.00 |
| ABAYE0293 | putative lipoprotein (ComL)                                                              |      | -3.10 | 0.12  | 0.00 |

|           |                                                                                                  |      |       |      |      |
|-----------|--------------------------------------------------------------------------------------------------|------|-------|------|------|
| ABAYE0294 | putative outer membrane protein (ComQ)                                                           |      | -2.80 | 0.14 | 0.00 |
| ABAYE0295 | shikimate-kinase                                                                                 | aroK | -0.48 | 0.72 | 0.00 |
| ABAYE0300 | conserved hypothetical protein                                                                   |      | 0.45  | 1.37 | 0.02 |
| ABAYE0302 | conserved hypothetical protein%3B putative membrane protein                                      |      | 0.64  | 1.56 | 0.01 |
| ABAYE0303 | conserved hypothetical protein                                                                   |      | 0.77  | 1.71 | 0.00 |
| ABAYE0304 | putative fimbrial protein precursor (Pilin)                                                      |      | -5.20 | 0.03 | 0.00 |
| ABAYE0308 | putative regulatory or redox component complexing with Bfr%2C in iron storage and mobility (Bfd) |      | 0.67  | 1.59 | 0.01 |
| ABAYE0314 | putative Fimbrial protein precursor%3B putative type IV pilin protein                            |      | -1.70 | 0.31 | 0.00 |
| ABAYE0315 | putative type IV fimbrial biogenesis protein                                                     |      | -2.00 | 0.25 | 0.00 |
| ABAYE0316 | pilin like competence factor                                                                     | comB | -2.20 | 0.22 | 0.00 |
| ABAYE0317 | putative type IV fimbrial biogenesis protein                                                     |      | -2.30 | 0.20 | 0.00 |
| ABAYE0318 | putative competence factor involved in DNA binding and uptake (ComC)                             |      | -1.70 | 0.31 | 0.00 |
| ABAYE0319 | Pilin like competence factor                                                                     | comE | -1.50 | 0.35 | 0.00 |
| ABAYE0320 | pilin like competence factor                                                                     | comF | -1.40 | 0.38 | 0.00 |
| ABAYE0329 | conserved hypothetical protein                                                                   |      | 0.91  | 1.88 | 0.00 |
| ABAYE0330 | conserved hypothetical protein%3B putative membrane protein                                      |      | 0.29  | 1.22 | 0.04 |
| ABAYE0334 | conserved hypothetical protein%3B putative exported protein                                      |      | 1.00  | 2.00 | 0.00 |

|           |                                                                                                                                |      |       |      |      |
|-----------|--------------------------------------------------------------------------------------------------------------------------------|------|-------|------|------|
| ABAYE0335 | conserved hypothetical protein                                                                                                 |      | 0.72  | 1.65 | 0.00 |
| ABAYE0336 | modulator of drug activity%2C similar to electron transfer flavoprotein-NAD/FAD/quinone oxidoreductase                         | mdaB | 0.56  | 1.47 | 0.00 |
| ABAYE0337 | conserved hypothetical protein%3B putative signal peptide                                                                      |      | 0.60  | 1.52 | 0.00 |
| ABAYE0340 | superoxide dismutase precursor (Cu-Zn)                                                                                         | sodC | 0.67  | 1.59 | 0.00 |
| ABAYE0345 | conserved hypothetical protein%3B putative exported protein                                                                    |      | 0.61  | 1.53 | 0.03 |
| ABAYE0346 | conserved hypothetical protein%3B putative exported protein                                                                    |      | 0.28  | 1.21 | 0.03 |
| ABAYE0347 | conserved hypothetical protein                                                                                                 |      | 0.41  | 1.33 | 0.01 |
| ABAYE0349 | putative APC family%2C S-methylmethionine transporter (MmuP)                                                                   |      | 0.47  | 1.39 | 0.03 |
| ABAYE0352 | succinylornithine transaminase (also has acetylornithine transaminase activity%2C PLP-dependent) (carbon starvation protein C) | astC | 0.32  | 1.25 | 0.02 |
| ABAYE0353 | arginine succinyltransferase                                                                                                   | astA | 0.52  | 1.43 | 0.02 |
| ABAYE0357 | conserved hypothetical protein%3B putative signal peptide                                                                      |      | 1.30  | 2.46 | 0.00 |
| ABAYE0359 | putative alkaline protease                                                                                                     |      | 0.63  | 1.55 | 0.02 |
| ABAYE0360 | conserved hypothetical protein%3B putative signal peptide                                                                      |      | 0.77  | 1.71 | 0.00 |
| ABAYE0361 | conserved hypothetical protein%3B putative signal peptide                                                                      |      | 0.83  | 1.78 | 0.00 |
| ABAYE0374 | conserved hypothetical protein%3B putative signal peptide                                                                      |      | 0.50  | 1.41 | 0.00 |
| ABAYE0376 | conserved hypothetical protein%3B putative signal peptide                                                                      |      | -0.71 | 0.61 | 0.00 |
| ABAYE0393 | putative DNA transformation protein (ComF)                                                                                     |      | 0.31  | 1.24 | 0.02 |

|           |                                                                                       |      |       |      |      |
|-----------|---------------------------------------------------------------------------------------|------|-------|------|------|
| ABAYE0395 | conserved hypothetical protein                                                        |      | 0.46  | 1.38 | 0.01 |
| ABAYE0399 | putative Proton/sodium-glutamate symport protein                                      |      | 0.26  | 1.20 | 0.03 |
| ABAYE0400 | conserved hypothetical protein                                                        |      | 0.35  | 1.27 | 0.02 |
| ABAYE0402 | conserved hypothetical protein                                                        |      | 0.24  | 1.18 | 0.04 |
| ABAYE0410 | 50S ribosomal protein L23                                                             | rplW | -0.31 | 0.81 | 0.02 |
| ABAYE0411 | 50S ribosomal protein L2                                                              | rplB | -0.49 | 0.71 | 0.01 |
| ABAYE0415 | 50S ribosomal protein L16                                                             | rplP | -0.23 | 0.85 | 0.05 |
| ABAYE0416 | 50S ribosomal protein L29                                                             | rpmC | -0.27 | 0.83 | 0.03 |
| ABAYE0433 | RNA polymerase%2C alpha subunit                                                       | rpoA | -0.50 | 0.71 | 0.01 |
| ABAYE0436 | acyl coenzyme A dehydrogenase                                                         | fadE | 0.51  | 1.42 | 0.02 |
| ABAYE0439 | conserved hypothetical protein%3B putative exported protein                           |      | 0.41  | 1.33 | 0.02 |
| ABAYE0441 | putative integral membrane protein%2C transporter                                     |      | 0.63  | 1.55 | 0.00 |
| ABAYE0447 | conserved hypothetical protein%3Bputative HAD-superfamily subfamily IB%2C PSPase-like |      | -0.53 | 0.69 | 0.01 |
| ABAYE0459 | conserved hypothetical protein%3B putative tonB-domain                                |      | -0.68 | 0.62 | 0.00 |
| ABAYE0464 | conserved hypothetical protein%3B putative exported protein                           |      | 0.60  | 1.52 | 0.00 |
| ABAYE0474 | conserved hypothetical protein                                                        |      | 0.45  | 1.37 | 0.04 |
| ABAYE0479 | putative dehydrogenase                                                                |      | 0.54  | 1.45 | 0.02 |



|           |                                                                                                                                 |      |       |      |      |
|-----------|---------------------------------------------------------------------------------------------------------------------------------|------|-------|------|------|
| ABAYE0481 | putative acyl-CoA dehydrogenase                                                                                                 |      | 0.47  | 1.39 | 0.00 |
| ABAYE0487 | 30S ribosomal protein S9                                                                                                        | rpsl | -0.29 | 0.82 | 0.03 |
| ABAYE0492 | conserved hypothetical protein%3B putative signal peptide                                                                       |      | -0.77 | 0.59 | 0.00 |
| ABAYE0505 | putative pyridine nucleotide-disulfide oxidoreductase%2C class I                                                                |      | -0.84 | 0.56 | 0.00 |
| ABAYE0506 | conserved hypothetical protein                                                                                                  |      | -2.80 | 0.14 | 0.00 |
| ABAYE0510 | transposase of ISAb1%2C IS4 family (ORF 1)                                                                                      |      | -0.59 | 0.66 | 0.03 |
| ABAYE0522 | conserved hypothetical protein%3B putative membrane protein                                                                     |      | -0.67 | 0.63 | 0.00 |
| ABAYE0523 | DNA repair protein%2C associated with replication forks                                                                         | radC | -0.78 | 0.58 | 0.00 |
| ABAYE0524 | bifunctional protein [Includes: 4-phosphopantothencysteine decarboxylase%3B phosphopantothencysteine synthetase%2C FMN-binding] | dfp  | -0.25 | 0.84 | 0.04 |
| ABAYE0529 | conserved hypothetical protein                                                                                                  |      | -1.90 | 0.27 | 0.00 |
| ABAYE0530 | conserved hypothetical protein%3B putative membrane protein                                                                     |      | -1.20 | 0.44 | 0.00 |
| ABAYE0537 | hypothetical protein                                                                                                            |      | 0.28  | 1.21 | 0.03 |
| ABAYE0539 | hypothetical protein                                                                                                            |      | 0.65  | 1.57 | 0.02 |
| ABAYE0540 | hypothetical protein                                                                                                            |      | 0.53  | 1.44 | 0.02 |
| ABAYE0548 | hypothetical protein%3B putative NAD-dependent DNA ligase                                                                       |      | -0.84 | 0.56 | 0.00 |
| ABAYE0549 | conserved hypothetical protein%3B putative exported protein                                                                     |      | -0.52 | 0.70 | 0.00 |
| ABAYE0552 | phage-related late control gene protein (GPD-like)                                                                              |      | 0.45  | 1.37 | 0.03 |

|           |                                                                                      |      |       |      |      |
|-----------|--------------------------------------------------------------------------------------|------|-------|------|------|
| ABAYE0559 | putative phage tail protein                                                          |      | -0.49 | 0.71 | 0.02 |
| ABAYE0570 | putative Phage small terminase subunit precursor                                     |      | -0.62 | 0.65 | 0.05 |
| ABAYE0571 | phage-related capsid protein precursor (GPN-like)                                    |      | -0.57 | 0.67 | 0.02 |
| ABAYE0572 | phage-related capsid scaffolding protein (GPO-like)                                  |      | -1.20 | 0.44 | 0.00 |
| ABAYE0579 | conserved hypothetical protein                                                       |      | -0.30 | 0.81 | 0.02 |
| ABAYE0585 | conserved hypothetical protein                                                       |      | -0.95 | 0.52 | 0.00 |
| ABAYE0589 | conserved hypothetical protein%3B putative membrane protein                          |      | 1.00  | 2.00 | 0.00 |
| ABAYE0603 | conserved hypothetical protein%3B putative signal peptide                            |      | 0.69  | 1.61 | 0.00 |
| ABAYE0604 | putative glycerophosphodiester phosphodiesterase                                     |      | 0.35  | 1.27 | 0.04 |
| ABAYE0613 | tryptophan synthase alpha chain                                                      | trpA | 0.48  | 1.39 | 0.01 |
| ABAYE0619 | putative antioxidant protein                                                         |      | 1.00  | 2.00 | 0.00 |
| ABAYE0621 | conserved hypothetical protein%3B putative exported protein                          |      | 0.41  | 1.33 | 0.01 |
| ABAYE0631 | conserved hypothetical protein                                                       |      | 0.45  | 1.37 | 0.02 |
| ABAYE0632 | putative glucose-sensitive porin (OprB-like )                                        |      | 0.50  | 1.41 | 0.00 |
| ABAYE0633 | glucose dehydrogenase [pyrroloquinoline-quinone] precursor (Quinoprotein glucose DH) | gcd  | 0.61  | 1.53 | 0.00 |
| ABAYE0637 | conserved hypothetical protein                                                       |      | 0.63  | 1.55 | 0.01 |
| ABAYE0639 | putative type IV fimbrial biogenesis protein                                         |      | -0.52 | 0.70 | 0.02 |

|           |                                                                                                                              |      |       |      |      |
|-----------|------------------------------------------------------------------------------------------------------------------------------|------|-------|------|------|
| ABAYE0640 | putative Outer membrane protein precursor (OmpA-like)                                                                        |      | -0.32 | 0.80 | 0.01 |
| ABAYE0647 | mechanosensitive channel                                                                                                     | mscL | 0.37  | 1.29 | 0.02 |
| ABAYE0659 | conserved hypothetical protein                                                                                               |      | 0.52  | 1.43 | 0.02 |
| ABAYE0662 | conserved hypothetical protein                                                                                               |      | 0.74  | 1.67 | 0.00 |
| ABAYE0663 | prolyl-tRNA synthetase                                                                                                       | proS | -0.25 | 0.84 | 0.03 |
| ABAYE0666 | conserved hypothetical protein%3B putative exported protein                                                                  |      | -1.70 | 0.31 | 0.00 |
| ABAYE0667 | twitching motility protein                                                                                                   | pilG | -2.80 | 0.14 | 0.00 |
| ABAYE0668 | twitching motility protein                                                                                                   | pilH | -2.70 | 0.15 | 0.00 |
| ABAYE0669 | twitching motility protein                                                                                                   | pilI | -3.50 | 0.09 | 0.00 |
| ABAYE0670 | type IV pilus biogenesis protein                                                                                             | pilJ | -4.00 | 0.06 | 0.00 |
| ABAYE0671 | putative sensor histidine kinase/response regulator%3B putative protein of chemotactic signal transduction system (ChA-like) |      | -3.60 | 0.08 | 0.00 |
| ABAYE0672 | conserved hypothetical protein                                                                                               |      | -2.70 | 0.15 | 0.00 |
| ABAYE0674 | putative Oxygen-independent coproporphyrinogen III oxidase                                                                   |      | -3.30 | 0.10 | 0.00 |
| ABAYE0675 | conserved hypothetical protein%3B putative enzyme                                                                            |      | -2.40 | 0.19 | 0.00 |
| ABAYE0676 | succinyl-diaminopimelate desuccinylase                                                                                       | dapE | 0.46  | 1.38 | 0.02 |
| ABAYE0677 | bacteriolytic lipoprotein entericidin B.                                                                                     | ecnB | 2.30  | 4.92 | 0.00 |
| ABAYE0682 | putative bifunctional protein [Includes: sulfite reductase [NADPH] flavoprotein alpha-component%3B iron-uptake factor]       |      | -1.10 | 0.47 | 0.00 |

|           |                                                                                               |          |       |      |      |
|-----------|-----------------------------------------------------------------------------------------------|----------|-------|------|------|
| ABAYE0690 | conserved hypothetical protein%3B putative exported protein                                   |          | 0.98  | 1.97 | 0.00 |
| ABAYE0693 | conserved hypothetical protein%3B putative exported protein                                   |          | -0.37 | 0.77 | 0.03 |
| ABAYE0694 | conserved hypothetical protein%3B putative exported protein                                   |          | -0.41 | 0.75 | 0.04 |
| ABAYE0695 | conserved hypothetical protein%3B putative exported protein                                   |          | 0.66  | 1.58 | 0.00 |
| ABAYE0703 | rod shape-determining protein                                                                 | mreD     | 0.43  | 1.35 | 0.04 |
| ABAYE0704 | putative Maf-like protein                                                                     |          | 0.38  | 1.30 | 0.05 |
| ABAYE0707 | conserved hypothetical protein                                                                |          | -0.46 | 0.73 | 0.04 |
| ABAYE0708 | bifunctional protein [Includes: wax ester synthase / acyl-CoA:diacylglycerol acyltransferase] | wax-dgaT | -0.57 | 0.67 | 0.04 |
| ABAYE0730 | conserved hypothetical protein%3B putative protein (DcaP-like)                                |          | -0.79 | 0.58 | 0.00 |
| ABAYE0731 | lipid A phosphoethanolamine transferase%2C associated with polymyxin resistance               | eptA     | -1.40 | 0.38 | 0.00 |
| ABAYE0732 | transcriptional regulator                                                                     | qseB     | -0.68 | 0.62 | 0.00 |
| ABAYE0733 | two-component sensor kinase transcription regulator protein                                   | qseC     | -3.30 | 0.10 | 0.00 |
| ABAYE0735 | putative ammonium transporter                                                                 |          | -0.92 | 0.53 | 0.01 |
| ABAYE0738 | conserved hypothetical protein                                                                |          | 0.46  | 1.38 | 0.02 |
| ABAYE0743 | conserved hypothetical protein%3B putative enzyme                                             |          | 0.28  | 1.21 | 0.02 |
| ABAYE0748 | putative membrane fusion protein (AdeA-like)                                                  |          | 0.32  | 1.25 | 0.01 |
| ABAYE0749 | putative phosphatidylglycerophosphatase B (PgpB)                                              |          | 0.41  | 1.33 | 0.02 |

|           |                                                                                                                                                                                                               |      |       |      |      |
|-----------|---------------------------------------------------------------------------------------------------------------------------------------------------------------------------------------------------------------|------|-------|------|------|
| ABAYE0751 | octaprenyl-diphosphate synthase (Octaprenyl pyrophosphate synthetase) (OPP synthetase)                                                                                                                        | ispB | -0.30 | 0.81 | 0.01 |
| ABAYE0754 | 50S ribosomal protein L27                                                                                                                                                                                     | rpmA | -0.32 | 0.80 | 0.01 |
| ABAYE0758 | multifunctional protein [Includes: Uroporphyrin-III C-methyltransferase (Urogen III methylase) (SUMT) (Uroporphyrinogen III methylase) (UROM)%3B Precorrin-2 oxidase %3B Ferrochelatase ] (Siroheme synthase) | cysG | 0.30  | 1.23 | 0.02 |
| ABAYE0786 | hypothetical protein                                                                                                                                                                                          |      | -0.57 | 0.67 | 0.00 |
| ABAYE0792 | conserved hypothetical protein%3B putative biofilm-associated protein with RTX toxins and related Ca2+-binding domain                                                                                         |      | 1.60  | 3.03 | 0.00 |
| ABAYE0793 | conserved hypothetical protein                                                                                                                                                                                |      | -0.51 | 0.70 | 0.01 |
| ABAYE0794 | hypothetical protein%3B putative bifunctional protein: [Includes: enzyme of poly-gamma-glutamate biosynthesis%3B D-alanyl-D-alanine carboxypeptidase]                                                         |      | -0.44 | 0.74 | 0.01 |
| ABAYE0795 | hypothetical protein%3B putative metalloprotease                                                                                                                                                              |      | -0.51 | 0.70 | 0.02 |
| ABAYE0799 | transcription elongation factor%2C cleaves 3 nucleotide of paused mRNA                                                                                                                                        | greA | -0.41 | 0.75 | 0.02 |
| ABAYE0802 | conserved hypothetical protein                                                                                                                                                                                |      | -0.50 | 0.71 | 0.00 |
| ABAYE0803 | conserved hypothetical protein                                                                                                                                                                                |      | 0.37  | 1.29 | 0.03 |
| ABAYE0804 | putative RNA-binding protein                                                                                                                                                                                  |      | 0.33  | 1.26 | 0.04 |
| ABAYE0821 | hypothetical protein%3B putative surface adhesion protein with RTX toxins and related Ca2+-binding proteins domains                                                                                           |      | -1.90 | 0.27 | 0.00 |
| ABAYE0824 | diacylglycerol kinase                                                                                                                                                                                         | dgkA | -1.50 | 0.35 | 0.00 |

|           |                                                                                                     |      |       |      |      |
|-----------|-----------------------------------------------------------------------------------------------------|------|-------|------|------|
| ABAYE0825 | conserved hypothetical protein%3B putative Metallo-beta-lactamase                                   |      | -0.70 | 0.62 | 0.00 |
| ABAYE0826 | putative glycerophosphoryl diester phosphodiesterase%2C periplasmic precursor protein (GLPQ)        |      | 0.40  | 1.32 | 0.03 |
| ABAYE0831 | putative transglycosylase                                                                           |      | -0.62 | 0.65 | 0.00 |
| ABAYE0832 | conserved hypothetical protein                                                                      |      | 0.60  | 1.52 | 0.04 |
| ABAYE0833 | conserved hypothetical protein                                                                      |      | 0.27  | 1.21 | 0.04 |
| ABAYE0838 | putative peptide synthetase                                                                         |      | -1.20 | 0.44 | 0.00 |
| ABAYE0839 | hypothetical protein%3B putative membrane protein                                                   |      | -0.91 | 0.53 | 0.00 |
| ABAYE0840 | hypothetical protein%3B putative membrane protein                                                   |      | 1.50  | 2.83 | 0.00 |
| ABAYE0846 | putative nitroreductase                                                                             |      | 0.54  | 1.45 | 0.03 |
| ABAYE0848 | putative HTH-type transcriptional protein (TetR family)                                             |      | 0.54  | 1.45 | 0.01 |
| ABAYE0874 | conserved hypothetical protein                                                                      |      | -0.24 | 0.85 | 0.05 |
| ABAYE0879 | conserved hypothetical protein                                                                      |      | -0.82 | 0.57 | 0.02 |
| ABAYE0893 | putative outer membrane protein                                                                     |      | -0.51 | 0.70 | 0.02 |
| ABAYE0901 | peptidoglycan-associated lipoprotein precursor                                                      | pal  | 0.61  | 1.53 | 0.00 |
| ABAYE0902 | tolerance to colicins E%2C E%2C A%2C and K%2C required for OM integrity                             | tolB | 0.55  | 1.46 | 0.00 |
| ABAYE0904 | tolerance to group A colicins%2C single-stranded filamentous DNA phage%2C required for OM integrity | tolA | 0.47  | 1.39 | 0.04 |

|           |                                                                                                                                                    |      |       |      |      |
|-----------|----------------------------------------------------------------------------------------------------------------------------------------------------|------|-------|------|------|
| ABAYE0905 | tolerance to group A colicins%2C single-stranded DNA filamentous phage%2C required for OM integrity                                                | tolR | 0.71  | 1.64 | 0.00 |
| ABAYE0906 | tolerance to group A colicins%2C single-stranded DNA filamentous phage%2C required for OM integrity                                                | tolQ | 0.52  | 1.43 | 0.02 |
| ABAYE0916 | putative nicotinamide/nicotinate-nucleotide adenylyltransferase                                                                                    |      | 0.47  | 1.39 | 0.04 |
| ABAYE0917 | conserved hypothetical protein%3B putative signal peptide                                                                                          |      | 0.46  | 1.38 | 0.05 |
| ABAYE0920 | conserved hypothetical protein%3B putative exported protein                                                                                        |      | 0.55  | 1.46 | 0.00 |
| ABAYE0924 | putative porin protein associated with imipenem resistance                                                                                         |      | 2.10  | 4.29 | 0.00 |
| ABAYE0926 | sulfate permease A protein%2C chromate resistance (ABC superfamily%2C atp_bind)                                                                    | cysA | 0.30  | 1.23 | 0.04 |
| ABAYE0927 | sulfate transport protein (ABC superfamily%2C membrane)                                                                                            | cysW | 0.55  | 1.46 | 0.01 |
| ABAYE0928 | sulfate transport protein (ABC superfamily%2C membrane)                                                                                            | cysT | 0.48  | 1.39 | 0.04 |
| ABAYE0936 | putative serine protease                                                                                                                           |      | 0.54  | 1.45 | 0.01 |
| ABAYE0940 | conserved hypothetical protein%3B putative exported protein                                                                                        |      | -0.44 | 0.74 | 0.00 |
| ABAYE0947 | putative L-allo-threonine dehydrogenase%2C NADP+-dependent (other substrates include L-serine%2C D-serine%2C D-threonine and 3-hydroxyisobutyrate) |      | -0.41 | 0.75 | 0.01 |
| ABAYE0952 | conserved hypothetical protein                                                                                                                     |      | 0.33  | 1.26 | 0.02 |
| ABAYE0966 | conserved hypothetical protein%3B putative exported protein                                                                                        |      | -0.57 | 0.67 | 0.03 |
| ABAYE0975 | deoxyribodipyrimidine photolyase (photoreactivation)%2C FAD-binding                                                                                | phrB | -1.00 | 0.50 | 0.00 |
| ABAYE0977 | NADH dehydrogenase                                                                                                                                 | ndh  | 0.41  | 1.33 | 0.04 |

|           |                                                                                           |      |       |      |      |
|-----------|-------------------------------------------------------------------------------------------|------|-------|------|------|
| ABAYE0979 | conserved hypothetical protein                                                            |      | -0.26 | 0.84 | 0.04 |
| ABAYE0986 | putative transcriptional regulator (LysR family)                                          |      | -0.65 | 0.64 | 0.00 |
| ABAYE0990 | putative protease                                                                         |      | -0.41 | 0.75 | 0.01 |
| ABAYE0992 | conserved hypothetical protein                                                            |      | -0.39 | 0.76 | 0.03 |
| ABAYE0993 | conserved hypothetical protein                                                            |      | -0.46 | 0.73 | 0.03 |
| ABAYE0994 | conserved hypothetical protein                                                            |      | 0.50  | 1.41 | 0.05 |
| ABAYE0995 | conserved hypothetical protein                                                            |      | -0.88 | 0.54 | 0.00 |
| ABAYE0996 | conserved hypothetical protein%3B putative enzyme                                         |      | -0.92 | 0.53 | 0.00 |
| ABAYE0997 | conserved hypothetical protein                                                            |      | -0.66 | 0.63 | 0.01 |
| ABAYE0998 | conserved hypothetical protein                                                            |      | -0.54 | 0.69 | 0.04 |
| ABAYE0999 | conserved hypothetical protein                                                            |      | -0.85 | 0.55 | 0.00 |
| ABAYE1000 | conserved hypothetical protein                                                            |      | -0.84 | 0.56 | 0.00 |
| ABAYE1013 | dual specificity pseudouridine synthase for 23S rRNA and tRNA <sup>phe</sup> modification | rluA | 0.44  | 1.36 | 0.03 |
| ABAYE1028 | putative aldehyde dehydrogenase                                                           |      | 1.30  | 2.46 | 0.03 |
| ABAYE1030 | putative pyruvate decarboxylase/indolepyruvate decarboxylase                              |      | 1.50  | 2.83 | 0.00 |
| ABAYE1042 | putative Nudix hydrolase                                                                  |      | 0.39  | 1.31 | 0.01 |
| ABAYE1045 | conserved hypothetical protein%3B putative exported protein                               |      | 1.10  | 2.14 | 0.00 |



|           |                                                                                                         |      |       |      |      |
|-----------|---------------------------------------------------------------------------------------------------------|------|-------|------|------|
| ABAYE1046 | conserved hypothetical protein%3B putative signal peptide                                               |      | -0.77 | 0.59 | 0.01 |
| ABAYE1048 | lipoprotein precursor                                                                                   | nlpD | 0.82  | 1.77 | 0.00 |
| ABAYE1049 | putative transcriptional regulator (LysR family)                                                        |      | -0.69 | 0.62 | 0.00 |
| ABAYE1054 | 50S ribosomal protein L31                                                                               | rpmE | -0.36 | 0.78 | 0.03 |
| ABAYE1055 | conserved hypothetical protein                                                                          |      | -1.60 | 0.33 | 0.00 |
| ABAYE1056 | conserved hypothetical protein                                                                          |      | -0.91 | 0.53 | 0.00 |
| ABAYE1066 | putative aldehyde dehydrogenase%3B putative betaine-aldehyde dehydrogenase                              |      | 0.52  | 1.43 | 0.03 |
| ABAYE1074 | putative Prevent host death protein (Phd-like)                                                          |      | 1.30  | 2.46 | 0.05 |
| ABAYE1078 | hypothetical protein%3B putative signal peptide                                                         |      | -0.43 | 0.74 | 0.03 |
| ABAYE1079 | hypothetical protein                                                                                    |      | -0.58 | 0.67 | 0.01 |
| ABAYE1082 | conserved hypothetical protein                                                                          |      | 0.42  | 1.34 | 0.04 |
| ABAYE1086 | putative acinetobactin biosynthesis protein (basA)                                                      |      | -0.64 | 0.64 | 0.03 |
| ABAYE1087 | putative non-ribosomal peptide synthetase with condensation and peptidyl carrier protein domains (basB) |      | -2.00 | 0.25 | 0.00 |
| ABAYE1089 | Ferric acinetobactin transport system permease protein                                                  | bauD | -1.20 | 0.44 | 0.00 |
| ABAYE1090 | Ferric acinetobactin transport system permease protein                                                  | bauC | -0.94 | 0.52 | 0.01 |
| ABAYE1091 | Ferric acinetobactin transport system ATP-binding protein                                               | bauE | -1.90 | 0.27 | 0.00 |
| ABAYE1092 | Putative ferric acinetobactin binding protein (BauB)                                                    |      | -1.40 | 0.38 | 0.00 |

|           |                                                                                                                               |      |       |      |      |
|-----------|-------------------------------------------------------------------------------------------------------------------------------|------|-------|------|------|
| ABAYE1093 | Putative ferric acinetobactin receptor (bauA)                                                                                 |      | -1.30 | 0.41 | 0.00 |
| ABAYE1094 | Putative acinetobactin siderophore biosynthesis protein (basC)                                                                |      | -0.47 | 0.72 | 0.03 |
| ABAYE1097 | 2%2C3-dihydro-2%2C3-dihydroxybenzoate synthetase (isochorismatase) (N-terminal) with aryl carrier protein domain (C-terminal) | basF | -0.99 | 0.50 | 0.00 |
| ABAYE1098 | Histidine decarboxylase                                                                                                       | hdc  | -0.74 | 0.60 | 0.02 |
| ABAYE1100 | putative ABC transporter ATP-binding component (barA)                                                                         |      | -0.62 | 0.65 | 0.01 |
| ABAYE1101 | putative ABC transporter (barB)                                                                                               |      | -0.83 | 0.56 | 0.00 |
| ABAYE1102 | putative thioesterase (bash)                                                                                                  |      | -0.70 | 0.62 | 0.00 |
| ABAYE1104 | isochorismate synthetase                                                                                                      | basJ | -0.47 | 0.72 | 0.04 |
| ABAYE1108 | conserved hypothetical protein%3B putative signal peptide                                                                     |      | -1.00 | 0.50 | 0.00 |
| ABAYE1109 | conserved hypothetical protein%3B putative signal peptide                                                                     |      | -0.50 | 0.71 | 0.05 |
| ABAYE1122 | putative aminopeptidase N(PEPN)                                                                                               |      | -0.40 | 0.76 | 0.03 |
| ABAYE1124 | putative peptidase%3B putative metallopeptidase                                                                               |      | 0.56  | 1.47 | 0.01 |
| ABAYE1125 | putative Amino acid/peptide transporter                                                                                       |      | 0.83  | 1.78 | 0.01 |
| ABAYE1136 | HtrA-like serine protease                                                                                                     | algW | 0.31  | 1.24 | 0.04 |
| ABAYE1144 | putative 4-carboxymuconolactone decarboxylase                                                                                 |      | 0.89  | 1.85 | 0.00 |
| ABAYE1145 | putative acyl-CoA dehydrogenase                                                                                               |      | 0.68  | 1.60 | 0.00 |
| ABAYE1151 | conserved hypothetical protein%3B putative exported protein                                                                   |      | 2.20  | 4.59 | 0.00 |

|           |                                                                                                                                                |      |       |      |      |
|-----------|------------------------------------------------------------------------------------------------------------------------------------------------|------|-------|------|------|
| ABAYE1154 | protein chain elongation factor EF-Ts                                                                                                          | tsf  | -0.46 | 0.73 | 0.00 |
| ABAYE1160 | putative rare lipoprotein A family (RlpA-like)                                                                                                 |      | 0.67  | 1.59 | 0.00 |
| ABAYE1172 | putative Outer membrane efflux protein                                                                                                         |      | 0.49  | 1.40 | 0.01 |
| ABAYE1173 | putative Multidrug/solvent efflux pump membrane transporter                                                                                    |      | 0.48  | 1.39 | 0.01 |
| ABAYE1174 | putative Multidrug/solvent efflux pump membrane transporter                                                                                    |      | 0.58  | 1.49 | 0.00 |
| ABAYE1176 | putative transcriptional regulator (LysR family)                                                                                               |      | 0.55  | 1.46 | 0.03 |
| ABAYE1177 | Lysine-arginine-ornithine-histidine-binding periplasmic protein precursor (ABC superfamily%2C peri_bind)                                       | hisJ | -0.71 | 0.61 | 0.00 |
| ABAYE1183 | putative protease                                                                                                                              |      | -1.10 | 0.47 | 0.04 |
| ABAYE1188 | transposase of IS10A%2C IS4 family                                                                                                             |      | 0.93  | 1.91 | 0.00 |
| ABAYE1189 | fragment of conserved hypothetical protein (part 2)                                                                                            |      | 1.10  | 2.14 | 0.00 |
| ABAYE1191 | putative secretion pathway ATPase                                                                                                              |      | -2.80 | 0.14 | 0.00 |
| ABAYE1192 | conserved hypothetical protein%3B putative exported protein                                                                                    |      | 3.20  | 9.19 | 0.00 |
| ABAYE1193 | putative two-component response regulator                                                                                                      |      | 1.40  | 2.64 | 0.00 |
| ABAYE1194 | putative two-component system sensor histidine kinase                                                                                          |      | 0.98  | 1.97 | 0.00 |
| ABAYE1197 | conserved hypothetical protein%3B putative exported protein                                                                                    |      | 0.65  | 1.57 | 0.00 |
| ABAYE1198 | bifunctional protein [Includes penicillin-insensitive transglycosylase%3B penicillin-sensitive transpeptidase] (penicillin-binding protein 1B) | mrcB | 0.40  | 1.32 | 0.01 |
| ABAYE1208 | conserved hypothetical protein                                                                                                                 |      | 0.32  | 1.25 | 0.03 |

|           |                                                                      |  |       |      |      |
|-----------|----------------------------------------------------------------------|--|-------|------|------|
| ABAYE1216 | conserved hypothetical protein%3B putative membrane protein          |  | 0.30  | 1.23 | 0.03 |
| ABAYE1218 | conserved hypothetical protein                                       |  | -0.32 | 0.80 | 0.02 |
| ABAYE1221 | conserved hypothetical protein%3B putative exported protein          |  | 0.71  | 1.64 | 0.00 |
| ABAYE1226 | conserved hypothetical protein                                       |  | 0.27  | 1.21 | 0.04 |
| ABAYE1227 | hypothetical protein                                                 |  | 0.40  | 1.32 | 0.03 |
| ABAYE1230 | conserved hypothetical protein                                       |  | 0.78  | 1.72 | 0.02 |
| ABAYE1231 | hypothetical protein                                                 |  | 0.77  | 1.71 | 0.00 |
| ABAYE1232 | hypothetical protein                                                 |  | 0.97  | 1.96 | 0.04 |
| ABAYE1233 | hypothetical protein                                                 |  | 1.30  | 2.46 | 0.02 |
| ABAYE1234 | hypothetical protein%3B putative exported protein                    |  | 2.40  | 5.28 | 0.00 |
| ABAYE1237 | hypothetical protein                                                 |  | 1.80  | 3.48 | 0.00 |
| ABAYE1239 | hypothetical protein                                                 |  | 0.68  | 1.60 | 0.01 |
| ABAYE1240 | conserved hypothetical protein%3B putative Phage replication protein |  | 1.20  | 2.30 | 0.00 |
| ABAYE1241 | hypothetical protein                                                 |  | 0.97  | 1.96 | 0.04 |
| ABAYE1245 | conserved hypothetical protein%3B putative phage related protein     |  | 1.00  | 2.00 | 0.00 |
| ABAYE1246 | hypothetical protein                                                 |  | 1.10  | 2.14 | 0.02 |
| ABAYE1253 | hypothetical protein                                                 |  | -0.36 | 0.78 | 0.01 |
| ABAYE1254 | hypothetical protein                                                 |  | 1.10  | 2.14 | 0.02 |

|           |                                                                            |      |       |      |      |
|-----------|----------------------------------------------------------------------------|------|-------|------|------|
| ABAYE1255 | hypothetical protein                                                       |      | 1.60  | 3.03 | 0.01 |
| ABAYE1256 | conserved hypothetical protein%3B putative phage related protein           |      | 0.84  | 1.79 | 0.02 |
| ABAYE1257 | hypothetical protein%3B putative exported protein                          |      | 1.20  | 2.30 | 0.01 |
| ABAYE1259 | conserved hypothetical protein                                             |      | 0.79  | 1.73 | 0.00 |
| ABAYE1260 | hypothetical protein                                                       |      | 1.60  | 3.03 | 0.00 |
| ABAYE1261 | conserved hypothetical protein%3B putative phage related protein           |      | 2.20  | 4.59 | 0.00 |
| ABAYE1263 | conserved hypothetical protein%3B putative phage related acetyltransferase |      | 1.20  | 2.30 | 0.01 |
| ABAYE1267 | hypothetical protein                                                       |      | -1.20 | 0.44 | 0.00 |
| ABAYE1270 | hypothetical protein                                                       |      | 1.90  | 3.73 | 0.00 |
| ABAYE1273 | conserved hypothetical protein%3B putative membrane protein                |      | 0.39  | 1.31 | 0.05 |
| ABAYE1280 | amidophosphoribosyltransferase                                             | purF | -0.31 | 0.81 | 0.04 |
| ABAYE1284 | conserved hypothetical protein%3B putative exported protein                |      | 0.50  | 1.41 | 0.02 |
| ABAYE1296 | putative Methylmalonate-semialdehyde dehydrogenase (MmsA-like)             |      | -0.62 | 0.65 | 0.04 |
| ABAYE1297 | putative amino acid transport protein                                      |      | -0.68 | 0.62 | 0.04 |
| ABAYE1298 | conserved hypothetical protein                                             |      | 1.10  | 2.14 | 0.01 |
| ABAYE1301 | putative methyltransferase                                                 |      | 0.89  | 1.85 | 0.00 |
| ABAYE1303 | conserved hypothetical protein%3B putative signal peptide                  |      | 0.94  | 1.92 | 0.04 |
| ABAYE1307 | putative HTH-type transcriptional regulator (AraC family)                  |      | 0.63  | 1.55 | 0.01 |

|           |                                                                          |      |       |      |      |
|-----------|--------------------------------------------------------------------------|------|-------|------|------|
| ABAYE1308 | putative poly(R)-hydroxyalkanoic acid synthase                           |      | 0.57  | 1.48 | 0.04 |
| ABAYE1309 | sodium/glutamate symport carrier protein                                 | gltS | 0.64  | 1.56 | 0.01 |
| ABAYE1314 | conserved hypothetical protein                                           |      | 0.48  | 1.39 | 0.02 |
| ABAYE1315 | conserved hypothetical protein%3B putative AAA ATPase                    |      | 1.20  | 2.30 | 0.00 |
| ABAYE1316 | putative HTH-type Transcriptional regulator (GntR family)                |      | 1.20  | 2.30 | 0.00 |
| ABAYE1318 | hypothetical protein%3B putative transcriptional regulator (TetR family) |      | 1.80  | 3.48 | 0.01 |
| ABAYE1319 | protein CsuA/B%3B putative secreted protein related to type I pili       |      | 1.50  | 2.83 | 0.00 |
| ABAYE1320 | protein CsuA                                                             |      | 0.98  | 1.97 | 0.00 |
| ABAYE1321 | protein CsuB%3B putative secreted protein related to type I pili         |      | 0.86  | 1.82 | 0.01 |
| ABAYE1322 | protein CsuC%3B putative type I pilus usher pathway chaperone            |      | 1.10  | 2.14 | 0.00 |
| ABAYE1323 | protein CsuD%3B putative type I pili usher protein                       |      | 1.20  | 2.30 | 0.00 |
| ABAYE1324 | protein CsuE%3B putative secreted protein related to type I pili         |      | 1.30  | 2.46 | 0.00 |
| ABAYE1326 | hypothetical protein                                                     |      | -0.38 | 0.77 | 0.04 |
| ABAYE1327 | conserved hypothetical protein                                           |      | 0.50  | 1.41 | 0.01 |
| ABAYE1328 | proline/betaine transporter (MFS superfamily)                            | proP | 1.90  | 3.73 | 0.00 |
| ABAYE1341 | putative heavy metal sensor kinase                                       |      | 0.36  | 1.28 | 0.04 |
| ABAYE1342 | putative outer membrane lipoprotein (lipocalin)                          |      | 0.69  | 1.61 | 0.01 |
| ABAYE1352 | conserved hypothetical protein%3B putative exported protein              |      | 0.51  | 1.42 | 0.04 |

|           |                                                                                                                                   |      |       |      |      |
|-----------|-----------------------------------------------------------------------------------------------------------------------------------|------|-------|------|------|
| ABAYE1353 | putative acetyltransferase%3B putative modification of 30S ribosomal subunit protein S5 (RIMJ)(acetylation of N-terminal alanine) |      | -1.30 | 0.41 | 0.05 |
| ABAYE1356 | L-sorbose dehydrogenase                                                                                                           | sndH | 1.00  | 2.00 | 0.00 |
| ABAYE1357 | putative acetyltransferase                                                                                                        |      | 1.30  | 2.46 | 0.00 |
| ABAYE1372 | fragment of conserved hypothetical protein (partial)                                                                              |      | 2.50  | 5.66 | 0.00 |
| ABAYE1373 | glucose-inhibited division protein A                                                                                              | gidA | 0.38  | 1.30 | 0.03 |
| ABAYE1377 | conserved hypothetical protein                                                                                                    |      | -0.36 | 0.78 | 0.04 |
| ABAYE1386 | cytochrome o ubiquinol oxidase subunit IV                                                                                         | cyoD | -0.27 | 0.83 | 0.02 |
| ABAYE1387 | cytochrome o ubiquinol oxidase subunit III                                                                                        | cyoC | -0.31 | 0.81 | 0.02 |
| ABAYE1399 | conserved hypothetical protein                                                                                                    |      | 0.63  | 1.55 | 0.01 |
| ABAYE1408 | putative binding-protein-dependent transport systems inner membrane component                                                     |      | 0.50  | 1.41 | 0.02 |
| ABAYE1411 | putative 3-hydroxyacyl-CoA dehydrogenase                                                                                          |      | 0.78  | 1.72 | 0.01 |
| ABAYE1412 | putative acyl-CoA dehydrogenase protein (acdB-like)                                                                               |      | 0.61  | 1.53 | 0.05 |
| ABAYE1413 | putative acetyl-CoA synthetase/AMP-(fatty) acid ligase                                                                            |      | 0.67  | 1.59 | 0.01 |
| ABAYE1415 | molybdopterin biosynthesis protein (moeB) OR thiamin-thiazole moiety synthesis (thiF)                                             |      | 0.85  | 1.80 | 0.00 |
| ABAYE1424 | regulator of kdp operon (transcriptional effector)                                                                                | kdpE | 0.43  | 1.35 | 0.01 |
| ABAYE1432 | aconitate hydratase 2                                                                                                             | acnB | -0.34 | 0.79 | 0.01 |
| ABAYE1433 | hypothetical protein                                                                                                              |      | -0.95 | 0.52 | 0.00 |

|           |                                                                                   |      |       |      |      |
|-----------|-----------------------------------------------------------------------------------|------|-------|------|------|
| ABAYE1437 | hypothetical protein%3B putative signal peptide                                   |      | -2.00 | 0.25 | 0.00 |
| ABAYE1438 | conserved hypothetical protein%3B putative signal peptide                         |      | -1.20 | 0.44 | 0.01 |
| ABAYE1439 | transcriptional regulator                                                         | metR | -0.27 | 0.83 | 0.05 |
| ABAYE1448 | delta(2)-isopentenylpyrophosphate tRNA-adenosine transferase                      | miaA | 0.34  | 1.27 | 0.04 |
| ABAYE1450 | putative integral membrane protein                                                |      | 0.55  | 1.46 | 0.01 |
| ABAYE1457 | Ethanolamine ammonia-lyase light chain (Ethanolamine ammonia-lyase small subunit) | eutC | 0.81  | 1.75 | 0.01 |
| ABAYE1459 | putative transport protein                                                        |      | 0.75  | 1.68 | 0.00 |
| ABAYE1460 | aldehyde dehydrogenase                                                            | ald1 | 1.20  | 2.30 | 0.00 |
| ABAYE1461 | putative transcriptional regulator                                                |      | 0.40  | 1.32 | 0.01 |
| ABAYE1462 | conserved hypothetical protein                                                    |      | 0.37  | 1.29 | 0.01 |
| ABAYE1463 | putative alcohol dehydrogenase                                                    |      | 1.70  | 3.25 | 0.00 |
| ABAYE1464 | putative helicase                                                                 |      | 0.23  | 1.17 | 0.05 |
| ABAYE1479 | hypothetical protein                                                              |      | 1.00  | 2.00 | 0.01 |
| ABAYE1480 | hypothetical protein%3B putative signal peptide                                   |      | -2.60 | 0.16 | 0.00 |
| ABAYE1484 | conserved hypothetical protein                                                    |      | -0.53 | 0.69 | 0.03 |
| ABAYE1486 | putative siderophore receptor                                                     |      | -0.82 | 0.57 | 0.03 |
| ABAYE1487 | putative transporter with mechanosensitive ion channel.                           |      | 1.10  | 2.14 | 0.00 |



|           |                                                                                                                                      |      |       |      |      |
|-----------|--------------------------------------------------------------------------------------------------------------------------------------|------|-------|------|------|
| ABAYE1488 | hypothetical protein                                                                                                                 |      | 0.65  | 1.57 | 0.02 |
| ABAYE1489 | hypothetical protein                                                                                                                 |      | 0.94  | 1.92 | 0.04 |
| ABAYE1490 | hypothetical protein                                                                                                                 |      | 1.60  | 3.03 | 0.00 |
| ABAYE1492 | hypothetical protein%3B putative signal peptide                                                                                      |      | 0.97  | 1.96 | 0.01 |
| ABAYE1494 | putative outer membrane porin%2C receptor for Fe(III)-coprogen%2C Fe(III)-ferrioxamine B and Fe(III)-rhodotruclic acid uptake (FhuE) |      | -0.70 | 0.62 | 0.00 |
| ABAYE1498 | conserved hypothetical protein                                                                                                       |      | 1.00  | 2.00 | 0.03 |
| ABAYE1500 | conserved hypothetical protein%3B putative stress protein                                                                            |      | -0.73 | 0.60 | 0.03 |
| ABAYE1503 | conserved hypothetical protein%3B putative signal peptide                                                                            |      | 2.90  | 7.46 | 0.00 |
| ABAYE1505 | P-type ATPase%2C Mg2+ ATPase transporter                                                                                             | mgtA | 1.10  | 2.14 | 0.00 |
| ABAYE1507 | putative benzoate membrane transport protein                                                                                         |      | -0.63 | 0.65 | 0.05 |
| ABAYE1508 | putative transcriptional regulator (AsnC family)%3B putative Leucine-responsive regulatory protein                                   |      | 0.53  | 1.44 | 0.00 |
| ABAYE1512 | conserved hypothetical protein%3B putative membrane protein                                                                          |      | 0.99  | 1.99 | 0.03 |
| ABAYE1514 | putative short-chain dehydrogenase                                                                                                   |      | 0.74  | 1.67 | 0.00 |
| ABAYE1515 | conserved hypothetical protein                                                                                                       |      | 0.43  | 1.35 | 0.00 |
| ABAYE1516 | conserved hypothetical protein                                                                                                       |      | 0.44  | 1.36 | 0.03 |
| ABAYE1517 | putative transcriptional regulator                                                                                                   |      | 0.71  | 1.64 | 0.00 |
| ABAYE1518 | methyl viologen resistance protein (MFS superfamily)                                                                                 | smvA | 1.00  | 2.00 | 0.00 |

|           |                                                                                                                           |       |       |      |      |
|-----------|---------------------------------------------------------------------------------------------------------------------------|-------|-------|------|------|
| ABAYE1524 | conserved hypothetical protein                                                                                            |       | 1.10  | 2.14 | 0.00 |
| ABAYE1529 | putative glutamate synthase.                                                                                              |       | 0.76  | 1.69 | 0.01 |
| ABAYE1530 | putative iron-regulated membrane protein                                                                                  |       | 0.55  | 1.46 | 0.00 |
| ABAYE1549 | molybdopterin biosynthesis%2C protein A                                                                                   | moaA  | 0.47  | 1.39 | 0.01 |
| ABAYE1550 | conserved hypothetical protein                                                                                            |       | 0.54  | 1.45 | 0.02 |
| ABAYE1551 | molybdopterin converting factor%2C large subunit                                                                          | moaE  | 0.45  | 1.37 | 0.01 |
| ABAYE1552 | bifunctional protein [Includes: molybdenum cofactor biosynthesis protein C%3B molybdenum cofactor biosynthesis protein B] | moaCB | 0.49  | 1.40 | 0.00 |
| ABAYE1553 | molybdopterin biosynthesis protein                                                                                        | moeA  | 0.34  | 1.27 | 0.03 |
| ABAYE1561 | putative intracellular sulfur oxidation protein (DsrE-like)                                                               |       | 0.80  | 1.74 | 0.00 |
| ABAYE1562 | putative UDP-galactose 4-epimerase (GalE-like)                                                                            |       | 1.10  | 2.14 | 0.00 |
| ABAYE1563 | fumarase C (fumarate hydratase Class II)                                                                                  | fumC  | 0.74  | 1.67 | 0.00 |
| ABAYE1564 | hypothetical protein                                                                                                      |       | 0.42  | 1.34 | 0.01 |
| ABAYE1565 | hypothetical protein%3B putative signal peptide                                                                           |       | -1.30 | 0.41 | 0.00 |
| ABAYE1574 | sensory kinase (soluble) in two-component regulatory system                                                               | glnL  | -0.64 | 0.64 | 0.05 |
| ABAYE1594 | conserved hypothetical protein%3B putative signal peptide                                                                 |       | -0.54 | 0.69 | 0.01 |
| ABAYE1595 | conserved hypothetical protein                                                                                            |       | -0.64 | 0.64 | 0.00 |
| ABAYE1604 | conserved hypothetical protein                                                                                            |       | 0.88  | 1.84 | 0.00 |

|           |                                                                                                                                             |      |       |      |      |
|-----------|---------------------------------------------------------------------------------------------------------------------------------------------|------|-------|------|------|
| ABAYE1605 | Quinoprotein glucose dehydrogenase-B precursor (Glucose dehydrogenase-B [pyrroloquinoline-quinone]) (Soluble glucose dehydrogenase) (s-GDH) | gdhB | 0.82  | 1.77 | 0.00 |
| ABAYE1608 | conserved hypothetical protein                                                                                                              |      | 0.46  | 1.38 | 0.01 |
| ABAYE1611 | conserved hypothetical protein%3B putative signal peptide                                                                                   |      | -4.00 | 0.06 | 0.00 |
| ABAYE1621 | methionine aminopeptidase                                                                                                                   | map  | -0.75 | 0.59 | 0.00 |
| ABAYE1622 | putative transcriptional regulator (LysR family)                                                                                            |      | 0.50  | 1.41 | 0.01 |
| ABAYE1629 | conserved hypothetical protein                                                                                                              |      | 0.51  | 1.42 | 0.04 |
| ABAYE1633 | conserved hypothetical protein                                                                                                              |      | 0.54  | 1.45 | 0.01 |
| ABAYE1635 | conserved hypothetical protein%3B putative membrane protein                                                                                 |      | -1.00 | 0.50 | 0.00 |
| ABAYE1636 | cytochrome d terminal oxidase polypeptide subunit II                                                                                        | cydB | -1.00 | 0.50 | 0.00 |
| ABAYE1637 | cytochrome d terminal oxidase%2C polypeptide subunit I                                                                                      | cydA | -1.20 | 0.44 | 0.00 |
| ABAYE1657 | conserved hypothetical protein%3B putative membrane protein                                                                                 |      | 0.38  | 1.30 | 0.03 |
| ABAYE1658 | phospho-2-dehydro-3-deoxyheptonate aldolase                                                                                                 | aro  | -1.10 | 0.47 | 0.00 |
| ABAYE1661 | 2%2C4-dienoyl-CoA reductase                                                                                                                 | fadH | 0.52  | 1.43 | 0.04 |
| ABAYE1671 | putative cell division protein (FtsB-like)                                                                                                  |      | 0.39  | 1.31 | 0.01 |
| ABAYE1672 | 2-C-methyl-D-erythritol 4-phosphate cytidyltransferase                                                                                      | ispD | 0.38  | 1.30 | 0.01 |
| ABAYE1673 | 3-oxoadipate CoA-transferase subunit A (Beta-ketoadipate:succinyl-CoA transferase subunit A)                                                | pcaI | 0.56  | 1.47 | 0.04 |

|           |                                                                                                    |      |       |      |      |
|-----------|----------------------------------------------------------------------------------------------------|------|-------|------|------|
| ABAYE1680 | protocatechuate 3%2C4-dioxygenase beta chain (3%2C4-PCD)                                           | pcaH | 0.85  | 1.80 | 0.02 |
| ABAYE1681 | protocatechuate 3%2C4-dioxygenase alpha chain (3%2C4-PCD)                                          | pcaG | 0.89  | 1.85 | 0.04 |
| ABAYE1682 | catabolic 3-dehydroquininate dehydratase (3-dehydroquinase)                                        | quiB | 1.10  | 2.14 | 0.00 |
| ABAYE1683 | 3-dehydroshikimate dehydratase (DHS dehydratase) (DHSase)                                          | quiC | 0.46  | 1.38 | 0.02 |
| ABAYE1686 | conserved hypothetical protein%3B putative signal peptide                                          |      | -0.73 | 0.60 | 0.00 |
| ABAYE1687 | conserved hypothetical protein%3B putative membrane protein                                        |      | -0.62 | 0.65 | 0.05 |
| ABAYE1688 | conserved hypothetical protein%3B putative membrane protein                                        |      | -0.57 | 0.67 | 0.01 |
| ABAYE1700 | putative Amidase                                                                                   |      | 1.80  | 3.48 | 0.02 |
| ABAYE1701 | conserved hypothetical protein%3B putative Acyl-CoA dehydrogenase domain                           |      | 2.40  | 5.28 | 0.00 |
| ABAYE1702 | conserved hypothetical protein                                                                     |      | 2.00  | 4.00 | 0.00 |
| ABAYE1703 | conserved hypothetical protein                                                                     |      | 2.00  | 4.00 | 0.00 |
| ABAYE1704 | putative aromatic-ring-hydroxylating dioxygenase large subunit                                     |      | 1.30  | 2.46 | 0.00 |
| ABAYE1705 | putative Aromatic-ring-hydroxylating dioxygenase small subunit                                     |      | 1.20  | 2.30 | 0.03 |
| ABAYE1706 | putative Short-chain dehydrogenase/reductase                                                       |      | 1.80  | 3.48 | 0.01 |
| ABAYE1707 | putative Ferredoxin (Oxidoreductase FAD/NAD(P)-binding region)%3B putative aromatic oxidoreductase |      | 0.88  | 1.84 | 0.02 |
| ABAYE1710 | Copper amine oxidase precursor (Tyramine oxidase) (2-phenylethylamine oxidase)                     | tynA | 0.83  | 1.78 | 0.01 |
| ABAYE1711 | conserved hypothetical protein%3B putative signal peptide                                          |      | 1.20  | 2.30 | 0.03 |

|           |                                                                                              |      |       |      |      |
|-----------|----------------------------------------------------------------------------------------------|------|-------|------|------|
| ABAYE1712 | phenylacetaldehyde dehydrogenase                                                             | feaB | 0.87  | 1.83 | 0.02 |
| ABAYE1714 | 3-oxoadipate enol-lactonase II (Beta-ketoadipate enol-lactone hydrolase II)                  | catD | 0.45  | 1.37 | 0.04 |
| ABAYE1715 | beta-ketoadipyl CoA thiolase                                                                 | catF | 0.79  | 1.73 | 0.01 |
| ABAYE1716 | 3-oxoadipate CoA-transferase subunit B (Beta-ketoadipate:succinyl-CoA transferase subunit B) | catJ | 0.92  | 1.89 | 0.03 |
| ABAYE1717 | 3-oxoadipate CoA-transferase subunit A (Beta-ketoadipate:succinyl-CoA transferase subunit A) | catI | 0.64  | 1.56 | 0.02 |
| ABAYE1718 | catechol 1%2C2-dioxygenase                                                                   | catA | 0.72  | 1.65 | 0.00 |
| ABAYE1719 | muconolactone delta-isomerase (MIase)                                                        | catC | 1.20  | 2.30 | 0.04 |
| ABAYE1720 | muconate cycloisomerase I (Cis%2Ccis-muconate lactonizing enzyme I) (MLE)                    | catB | 0.39  | 1.31 | 0.04 |
| ABAYE1728 | putative NADP-dependent aldehyde dehydrogenase (AldH-like)                                   |      | 1.10  | 2.14 | 0.00 |
| ABAYE1730 | Dihydrocoumarin hydrolase                                                                    | dch  | 0.71  | 1.64 | 0.00 |
| ABAYE1732 | conserved hypothetical protein%3B putative oxidoreductase                                    |      | 0.56  | 1.47 | 0.00 |
| ABAYE1733 | conserved hypothetical protein%3B putative signal peptide                                    |      | 0.64  | 1.56 | 0.01 |
| ABAYE1736 | putative oxidoreductase%3B putative Metal-binding Oxidoreductase                             |      | 0.43  | 1.35 | 0.01 |
| ABAYE1740 | putative transcriptional regulator (AraC family)                                             |      | -0.41 | 0.75 | 0.02 |
| ABAYE1741 | putative short chain dehydrogenase                                                           |      | 1.90  | 3.73 | 0.00 |
| ABAYE1746 | L-sorbose dehydrogenase                                                                      | sndH | 1.40  | 2.64 | 0.00 |

|           |                                                                                                                                             |      |       |      |      |
|-----------|---------------------------------------------------------------------------------------------------------------------------------------------|------|-------|------|------|
| ABAYE1747 | conserved hypothetical protein%3B putative membrane protein                                                                                 |      | 1.40  | 2.64 | 0.01 |
| ABAYE1749 | putative Isochorismatase hydrolase                                                                                                          |      | 0.95  | 1.93 | 0.01 |
| ABAYE1750 | putative transcriptional regulator (LysR family)                                                                                            |      | 0.71  | 1.64 | 0.00 |
| ABAYE1751 | Quinoprotein glucose dehydrogenase-B precursor (Glucose dehydrogenase-B [pyrroloquinoline-quinone]) (Soluble glucose dehydrogenase) (s-GDH) | gdhB | 0.30  | 1.23 | 0.04 |
| ABAYE1752 | glutathione-regulated potassium-efflux system protein (K+)/H(+) antiporter)                                                                 | kef  | 0.47  | 1.39 | 0.02 |
| ABAYE1753 | hypothetical protein%3B putative signal peptide                                                                                             |      | 0.84  | 1.79 | 0.01 |
| ABAYE1757 | hypothetical protein                                                                                                                        |      | -0.77 | 0.59 | 0.01 |
| ABAYE1759 | conserved hypothetical protein                                                                                                              |      | -0.87 | 0.55 | 0.00 |
| ABAYE1760 | conserved hypothetical protein                                                                                                              |      | -0.51 | 0.70 | 0.00 |
| ABAYE1761 | conserved hypothetical protein                                                                                                              |      | -0.61 | 0.66 | 0.01 |
| ABAYE1763 | hypothetical protein%3B putative signal peptide                                                                                             |      | -0.80 | 0.57 | 0.03 |
| ABAYE1768 | putative Permease of the major facilitator                                                                                                  |      | 0.67  | 1.59 | 0.02 |
| ABAYE1769 | conserved hypothetical protein%3B putative metal-dependent hydrolase                                                                        |      | 0.73  | 1.66 | 0.00 |
| ABAYE1770 | conserved hypothetical protein%3B putative membrane protein                                                                                 |      | 0.73  | 1.66 | 0.01 |
| ABAYE1774 | putative transcriptional regulator (LysR family)                                                                                            |      | 0.72  | 1.65 | 0.00 |
| ABAYE1777 | putative Multidrug resistance efflux pump                                                                                                   |      | 0.45  | 1.37 | 0.03 |

|           |                                                                                                                              |      |       |       |      |
|-----------|------------------------------------------------------------------------------------------------------------------------------|------|-------|-------|------|
| ABAYE1778 | putative Permease of the major facilitator superfamily%3B putative Multidrug efflux MFS transporter                          |      | 0.58  | 1.49  | 0.02 |
| ABAYE1781 | putative Dihydroxy-acid and 6-phosphogluconate dehydratase (IlvD-Edd-like )                                                  |      | 0.46  | 1.38  | 0.04 |
| ABAYE1784 | conserved hypothetical protein%3B putative NAD-dependent epimerase/dehydratase                                               |      | 0.68  | 1.60  | 0.01 |
| ABAYE1785 | putative Permease of the major facilitator%3B putative tartrate transporter                                                  |      | 0.54  | 1.45  | 0.01 |
| ABAYE1792 | putative methylenetetrahydrofolate reductase                                                                                 |      | 0.64  | 1.56  | 0.01 |
| ABAYE1795 | putative amidase                                                                                                             |      | 0.41  | 1.33  | 0.05 |
| ABAYE1801 | conserved hypothetical protein                                                                                               |      | 0.53  | 1.44  | 0.03 |
| ABAYE1805 | conserved hypothetical protein%3B putative bifunctional protein [Includes :putative Restriction enzyme%3B putative helicase] |      | -0.47 | 0.72  | 0.01 |
| ABAYE1818 | hypothetical protein                                                                                                         |      | 0.54  | 1.45  | 0.02 |
| ABAYE1821 | membrane fusion protein                                                                                                      | adeA | 4.80  | 27.86 | 0.00 |
| ABAYE1822 | RND protein                                                                                                                  | adeB | 3.80  | 13.93 | 0.00 |
| ABAYE1823 | outer membrane protein                                                                                                       | adeC | 4.60  | 24.25 | 0.00 |
| ABAYE1824 | conserved hypothetical protein                                                                                               |      | 3.80  | 13.93 | 0.00 |
| ABAYE1828 | conserved hypothetical protein%3B putative membrane protein                                                                  |      | 0.51  | 1.42  | 0.04 |
| ABAYE1830 | hypothetical protein                                                                                                         |      | -1.80 | 0.29  | 0.00 |
| ABAYE1831 | putative phage/plasmid replication protein                                                                                   |      | -1.40 | 0.38  | 0.00 |

|           |                                                                  |  |       |      |      |
|-----------|------------------------------------------------------------------|--|-------|------|------|
| ABAYE1833 | hypothetical protein                                             |  | -1.70 | 0.31 | 0.00 |
| ABAYE1834 | conserved hypothetical protein%3B putative phage-related protein |  | -0.74 | 0.60 | 0.00 |
| ABAYE1835 | conserved hypothetical protein%3B putative Phage-related protein |  | -0.68 | 0.62 | 0.03 |
| ABAYE1836 | hypothetical protein                                             |  | -0.89 | 0.54 | 0.00 |
| ABAYE1837 | hypothetical protein%3B putative phage-related exported protein  |  | -4.70 | 0.04 | 0.00 |
| ABAYE1838 | hypothetical protein                                             |  | -4.20 | 0.05 | 0.00 |
| ABAYE1839 | hypothetical protein                                             |  | -1.80 | 0.29 | 0.00 |
| ABAYE1840 | putative phage/plasmid replication protein                       |  | -1.50 | 0.35 | 0.00 |
| ABAYE1846 | hypothetical protein                                             |  | -0.53 | 0.69 | 0.01 |
| ABAYE1847 | conserved hypothetical protein%3B putative phage-related protein |  | -0.50 | 0.71 | 0.02 |
| ABAYE1849 | hypothetical protein                                             |  | -0.47 | 0.72 | 0.00 |
| ABAYE1850 | hypothetical protein%3B putative phage-related exported protein  |  | -3.20 | 0.11 | 0.00 |
| ABAYE1851 | hypothetical protein                                             |  | -3.40 | 0.09 | 0.00 |
| ABAYE1855 | hypothetical protein%3B putative exported protein                |  | -1.80 | 0.29 | 0.00 |
| ABAYE1856 | putative fimbrial protein precursor (Pilin)                      |  | -2.20 | 0.22 | 0.00 |
| ABAYE1857 | putative pilin chaperone                                         |  | -1.30 | 0.41 | 0.01 |
| ABAYE1858 | putative outer membrane usher protein                            |  | -1.40 | 0.38 | 0.01 |
| ABAYE1859 | putative Fimbria adhesin protein                                 |  | -1.50 | 0.35 | 0.00 |



|           |                                                                                           |      |       |      |      |
|-----------|-------------------------------------------------------------------------------------------|------|-------|------|------|
| ABAYE1860 | hypothetical protein%3B putative exported protein                                         |      | -2.60 | 0.16 | 0.00 |
| ABAYE1868 | transposase of ISAb1%2C IS4 family (ORF 1)                                                |      | -0.52 | 0.70 | 0.01 |
| ABAYE1875 | hypothetical protein                                                                      |      | 1.60  | 3.03 | 0.00 |
| ABAYE1876 | hypothetical protein                                                                      |      | 2.30  | 4.92 | 0.00 |
| ABAYE1877 | Zn-dependent dipeptidase                                                                  | acdP | 0.76  | 1.69 | 0.00 |
| ABAYE1878 | coenzyme PQQ synthesis protein E (Coenzyme PQQ synthesis protein III)                     | pqqE | 0.90  | 1.87 | 0.00 |
| ABAYE1879 | coenzyme PQQ synthesis protein D (Coenzyme PQQ synthesis protein II)                      | pqqD | 0.89  | 1.85 | 0.00 |
| ABAYE1880 | coenzyme PQQ synthesis protein C (Coenzyme PQQ synthesis protein I)                       | pqqC | 0.72  | 1.65 | 0.00 |
| ABAYE1881 | coenzyme PQQ synthesis protein B (Coenzyme PQQ synthesis protein V)                       | pqqB | 0.71  | 1.64 | 0.00 |
| ABAYE1882 | coenzyme PQQ synthesis protein A (Coenzyme PQQ synthesis protein IV)                      | pqqA | 0.68  | 1.60 | 0.00 |
| ABAYE1890 | hypothetical protein                                                                      |      | 1.20  | 2.30 | 0.00 |
| ABAYE1897 | anthranilate dioxygenase small subunit                                                    | antB | 1.70  | 3.25 | 0.01 |
| ABAYE1902 | conserved hypothetical protein                                                            |      | 0.63  | 1.55 | 0.03 |
| ABAYE1904 | putative oxidoreductase%2C short-chain dehydrogenase/reductase family                     |      | 1.60  | 3.03 | 0.00 |
| ABAYE1906 | fragment of putative carboxymethylenebutenolidase (Dienelactone hydrolase) (DLH) (part 1) |      | 1.20  | 2.30 | 0.01 |
| ABAYE1910 | putative D-beta-hydroxybutyrate permease                                                  |      | 0.60  | 1.52 | 0.01 |

|           |                                                                                                              |      |       |      |      |
|-----------|--------------------------------------------------------------------------------------------------------------|------|-------|------|------|
| ABAYE1913 | acetoacetyl-CoA transferase%2C alpha subunit                                                                 | atoD | 0.56  | 1.47 | 0.02 |
| ABAYE1914 | acetoacetyl-CoA transferase%2C beta subunit                                                                  | atoA | 0.84  | 1.79 | 0.00 |
| ABAYE1916 | putative acetyl-CoA acetyltransferase (Acetoacetyl-CoA thiolase)                                             |      | 0.57  | 1.48 | 0.01 |
| ABAYE1923 | dicarboxylic acid transport protein%3B alpha-ketoglutarate permease (MFS superfamily)                        | pcaT | 0.59  | 1.51 | 0.00 |
| ABAYE1924 | hypothetical protein                                                                                         |      | 0.75  | 1.68 | 0.03 |
| ABAYE1925 | conserved hypothetical protein                                                                               |      | 0.65  | 1.57 | 0.00 |
| ABAYE1928 | putative transport protein (ABC superfamily%2C peri_bind)%3B putative nitrate ABC transporter%2C periplasmic |      | 0.52  | 1.43 | 0.04 |
| ABAYE1931 | putative transcriptional regulator (GntR family)                                                             |      | 1.00  | 2.00 | 0.03 |
| ABAYE1934 | putative transcriptional regulator                                                                           |      | 0.60  | 1.52 | 0.04 |
| ABAYE1936 | conserved hypothetical protein%3B putative membrane protein                                                  |      | -0.47 | 0.72 | 0.02 |
| ABAYE1937 | putative homoserine dehydrogenase (HDH)                                                                      |      | -0.73 | 0.60 | 0.01 |
| ABAYE1938 | conserved hypothetical protein%3B putative membrane protein                                                  |      | -0.53 | 0.69 | 0.02 |
| ABAYE1939 | conserved hypothetical protein%3B putative NAD(FAD)-dependent dehydrogenase                                  |      | -0.83 | 0.56 | 0.01 |
| ABAYE1940 | conserved hypothetical protein%3B putative Beta-lactamase-like protein                                       |      | -0.87 | 0.55 | 0.00 |
| ABAYE1943 | putative (R%2CR)-butanediol dehydrogenase                                                                    |      | 0.49  | 1.40 | 0.00 |
| ABAYE1945 | dihydrolipoamide dehydrogenase (E3 component of pyruvate and 2-oxoglutarate dehydrogenases complexes)        | acoD | 0.75  | 1.68 | 0.00 |

|           |                                                                                                                                                                            |      |       |      |      |
|-----------|----------------------------------------------------------------------------------------------------------------------------------------------------------------------------|------|-------|------|------|
| ABAYE1946 | dihydrolipoamide acetyltransferase                                                                                                                                         | acoC | 1.10  | 2.14 | 0.00 |
| ABAYE1947 | acetoin:2%2C6-dichlorophenolindophenol oxidoreductase beta subunit (Acetoin:DCPIP oxidoreductase-beta) (AO:DCPIP OR) (TPP-dependent acetoin dehydrogenase E1 beta-subunit) | acoB | 1.30  | 2.46 | 0.00 |
| ABAYE1948 | acetoin:2%2C6-dichlorophenolindophenol oxidoreductase alpha subunit (Acetoin:DCPIP oxidoreductase-alpha) (AO:DCPIP OR)                                                     | acoA | 1.40  | 2.64 | 0.00 |
| ABAYE1949 | lipoate synthase                                                                                                                                                           | lipA | 0.39  | 1.31 | 0.03 |
| ABAYE1950 | putative transcriptional regulator%3B putative regulator of acetoin metabolisme                                                                                            |      | 0.48  | 1.39 | 0.02 |
| ABAYE1951 | conserved hypothetical protein                                                                                                                                             |      | -0.82 | 0.57 | 0.00 |
| ABAYE1952 | conserved hypothetical protein                                                                                                                                             |      | -0.58 | 0.67 | 0.02 |
| ABAYE1956 | fragment of conserved hypothetical protein (part 2)                                                                                                                        |      | 0.40  | 1.32 | 0.02 |
| ABAYE1957 | fragment of conserved hypothetical protein (part 1)                                                                                                                        |      | 0.69  | 1.61 | 0.00 |
| ABAYE1958 | conserved hypothetical protein                                                                                                                                             |      | 0.41  | 1.33 | 0.02 |
| ABAYE1959 | conserved hypothetical protein%3B putative membrane protein                                                                                                                |      | 0.40  | 1.32 | 0.01 |
| ABAYE1960 | conserved hypothetical protein                                                                                                                                             |      | 0.30  | 1.23 | 0.03 |
| ABAYE1962 | conserved hypothetical protein                                                                                                                                             |      | 0.80  | 1.74 | 0.00 |
| ABAYE1963 | hypothetical protein                                                                                                                                                       |      | -0.59 | 0.66 | 0.01 |
| ABAYE1964 | hypothetical protein                                                                                                                                                       |      | -1.50 | 0.35 | 0.00 |
| ABAYE1965 | ribonuclease D%2C processes tRNA                                                                                                                                           | rnd  | -0.42 | 0.75 | 0.01 |

|           |                                                                             |  |       |      |      |
|-----------|-----------------------------------------------------------------------------|--|-------|------|------|
| ABAYE1968 | conserved hypothetical protein                                              |  | 0.61  | 1.53 | 0.00 |
| ABAYE1969 | hypothetical protein                                                        |  | 1.40  | 2.64 | 0.03 |
| ABAYE1971 | putative poly(R)-hydroxyalkanoic acid synthase                              |  | 0.47  | 1.39 | 0.02 |
| ABAYE1973 | hypothetical protein%3B putative exported protein                           |  | -0.81 | 0.57 | 0.00 |
| ABAYE1975 | conserved hypothetical protein                                              |  | 0.85  | 1.80 | 0.00 |
| ABAYE1979 | putative porin precursor                                                    |  | 0.47  | 1.39 | 0.01 |
| ABAYE1980 | conserved hypothetical protein                                              |  | 0.91  | 1.88 | 0.00 |
| ABAYE1981 | conserved hypothetical protein                                              |  | 0.38  | 1.30 | 0.05 |
| ABAYE1982 | conserved hypothetical protein                                              |  | 0.27  | 1.21 | 0.05 |
| ABAYE1988 | conserved hypothetical protein%3B putative membrane protein                 |  | 0.92  | 1.89 | 0.00 |
| ABAYE1991 | conserved hypothetical protein%3B putative exported protein                 |  | 0.47  | 1.39 | 0.02 |
| ABAYE1996 | putative hydrolase%2C haloacid dehalogenase-like family                     |  | 0.43  | 1.35 | 0.03 |
| ABAYE1999 | conserved hypothetical protein%3B putative membrane protein                 |  | -0.79 | 0.58 | 0.00 |
| ABAYE2001 | putative ferric siderophore receptor protein                                |  | -1.70 | 0.31 | 0.00 |
| ABAYE2003 | conserved hypothetical protein                                              |  | -0.43 | 0.74 | 0.02 |
| ABAYE2004 | conserved hypothetical protein%3B putative siderophore biosynthesis protein |  | -0.58 | 0.67 | 0.00 |
| ABAYE2005 | conserved hypothetical protein                                              |  | -0.59 | 0.66 | 0.00 |
| ABAYE2007 | putative lysine/ornithine N-monooxygenase                                   |  | -0.90 | 0.54 | 0.03 |

|           |                                                                                                         |      |       |      |      |
|-----------|---------------------------------------------------------------------------------------------------------|------|-------|------|------|
| ABAYE2011 | conserved hypothetical protein%3B putative exported protein                                             |      | 0.28  | 1.21 | 0.02 |
| ABAYE2017 | DNA-binding protein HU-beta                                                                             | hupB | -0.32 | 0.80 | 0.03 |
| ABAYE2034 | conserved hypothetical protein%3B putative exported protein                                             |      | 0.40  | 1.32 | 0.01 |
| ABAYE2038 | conserved hypothetical protein                                                                          |      | -0.37 | 0.77 | 0.03 |
| ABAYE2047 | putative TonB protein                                                                                   |      | -0.69 | 0.62 | 0.02 |
| ABAYE2057 | conserved hypothetical protein%3B putative membrane protein                                             |      | -0.24 | 0.85 | 0.05 |
| ABAYE2059 | conserved hypothetical protein%3B putative exported protein                                             |      | 0.59  | 1.51 | 0.00 |
| ABAYE2060 | integration host factor (IHF)%2Cbeta subunit%2C site specific recombination                             | himD | 0.48  | 1.39 | 0.01 |
| ABAYE2061 | 30S ribosomal protein S1                                                                                | rpsA | -0.46 | 0.73 | 0.02 |
| ABAYE2073 | conserved hypothetical protein                                                                          |      | -0.40 | 0.76 | 0.00 |
| ABAYE2074 | type 4 fimbrial biogenesis protein                                                                      | pilZ | -0.87 | 0.55 | 0.00 |
| ABAYE2075 | DNA polymerase III%2C delta prime subunit                                                               | holB | -0.32 | 0.80 | 0.03 |
| ABAYE2078 | lipid transport protein%2C flippase (ABC superfamily%2C membrane (N-terminal)%2C atp_bind (C-terminal)) | msbA | -0.23 | 0.85 | 0.03 |
| ABAYE2080 | putative biopolymer transport protein (EXBB-like)                                                       |      | -0.56 | 0.68 | 0.02 |
| ABAYE2087 | peptidyl-prolyl cis-trans isomerase                                                                     | surA | 0.25  | 1.19 | 0.05 |
| ABAYE2092 | conserved hypothetical protein                                                                          |      | 0.34  | 1.27 | 0.05 |
| ABAYE2096 | putative transcriptional regulator (ArsR family)                                                        |      | 1.30  | 2.46 | 0.00 |

|           |                                                                    |            |       |      |      |
|-----------|--------------------------------------------------------------------|------------|-------|------|------|
| ABAYE2100 | putative transport protein (ABC superfamily%2C ATP_bind)           |            | 0.35  | 1.27 | 0.03 |
| ABAYE2101 | conserved hypothetical protein                                     |            | 0.35  | 1.27 | 0.03 |
| ABAYE2104 | NAD-dependent deacetylase (Regulatory protein sirtuin family)      | npdA       | 0.45  | 1.37 | 0.03 |
| ABAYE2106 | leucine-responsive regulatory protein                              | lrp        | 0.51  | 1.42 | 0.02 |
| ABAYE2114 | conserved hypothetical protein%3B putative exported protein        |            | 0.39  | 1.31 | 0.05 |
| ABAYE2122 | Carbapenem-hydrolyzing oxacillinase OXA-69 (Beta-lactamase OXA-69) | bla-OXA-69 | 1.10  | 2.14 | 0.00 |
| ABAYE2131 | conserved hypothetical protein                                     |            | -0.92 | 0.53 | 0.00 |
| ABAYE2132 | putative fimbrial protein precursor (Pilin)                        |            | -3.10 | 0.12 | 0.00 |
| ABAYE2133 | putative pilin chaperone                                           |            | -1.80 | 0.29 | 0.00 |
| ABAYE2134 | fragment of putative outer membrane usher protein (part 1)         |            | -0.88 | 0.54 | 0.01 |
| ABAYE2136 | transposase of ISAb1%2C IS4 family (ORF 1)                         |            | -0.61 | 0.66 | 0.00 |
| ABAYE2140 | hypothetical protein%3B putative exported protein                  |            | 1.20  | 2.30 | 0.01 |
| ABAYE2141 | putative transcriptional regulator (LysR family)                   |            | 0.55  | 1.46 | 0.00 |
| ABAYE2149 | putative phage integrase                                           |            | -0.58 | 0.67 | 0.00 |
| ABAYE2151 | conserved hypothetical protein                                     |            | -0.64 | 0.64 | 0.00 |
| ABAYE2152 | putative transcriptional regulator (TetR family)                   |            | -1.20 | 0.44 | 0.00 |
| ABAYE2168 | D-methionine transport protein (ABC superfamily%2C peri_bind)      | metQ       | 0.32  | 1.25 | 0.04 |

|           |                                                                                                                                      |      |       |      |      |
|-----------|--------------------------------------------------------------------------------------------------------------------------------------|------|-------|------|------|
| ABAYE2174 | conserved hypothetical protein%3B putative exported protein                                                                          |      | -0.90 | 0.54 | 0.00 |
| ABAYE2178 | conserved hypothetical protein                                                                                                       |      | -1.10 | 0.47 | 0.00 |
| ABAYE2183 | putative transcriptional regulator (AraC family)                                                                                     |      | 0.49  | 1.40 | 0.01 |
| ABAYE2187 | putative glutamate symport transmembrane protein                                                                                     |      | 0.95  | 1.93 | 0.01 |
| ABAYE2190 | putative tRNA/rRNA methyltransferase                                                                                                 |      | 0.37  | 1.29 | 0.02 |
| ABAYE2191 | serine acetyltransferase                                                                                                             | cysE | 0.27  | 1.21 | 0.03 |
| ABAYE2192 | conserved hypothetical protein%3B putative exported protein                                                                          |      | 0.39  | 1.31 | 0.01 |
| ABAYE2195 | putative chromate transport protein                                                                                                  |      | 1.00  | 2.00 | 0.00 |
| ABAYE2200 | Arsenate reductase                                                                                                                   |      | 1.80  | 3.48 | 0.00 |
| ABAYE2201 | fragment of conserved hypothetical protein                                                                                           |      | 1.30  | 2.46 | 0.01 |
| ABAYE2208 | hydantoin-racemase                                                                                                                   | hyu  | 0.65  | 1.57 | 0.02 |
| ABAYE2209 | Alpha-ketoglutarate-dependent taurine dioxygenase (2-aminoethanesulfonate dioxygenase) (Sulfate starvation-induced protein 3) (SSI3) | tauD | 0.51  | 1.42 | 0.01 |
| ABAYE2216 | putative acyl-CoA dehydrogenase                                                                                                      |      | 0.91  | 1.88 | 0.00 |
| ABAYE2217 | conserved hypothetical protein                                                                                                       |      | 1.50  | 2.83 | 0.00 |
| ABAYE2219 | ubiquinol oxidase subunit I%2C cyanide insensitive                                                                                   | cioA | 1.60  | 3.03 | 0.00 |
| ABAYE2220 | ubiquinol oxidase subunit II%2C cyanide insensitive                                                                                  | cioB | 1.70  | 3.25 | 0.00 |
| ABAYE2223 | putative bifunctional protein [Includes: putative transcriptional regulator (GntR                                                    |      | 0.54  | 1.45 | 0.00 |

|           |                                                                                                          |      |       |      |      |
|-----------|----------------------------------------------------------------------------------------------------------|------|-------|------|------|
|           | family)%3B putative amino transferase]                                                                   |      |       |      |      |
| ABAYE2227 | malonate decarboxylase%2C epsilon subunit (acyl carrier transferase)                                     | mdcH | 0.61  | 1.53 | 0.05 |
| ABAYE2228 | phosphoribosyl-dephospho-CoA transferase (Holo-ACP synthase)                                             | mdcG | 0.51  | 1.42 | 0.02 |
| ABAYE2229 | malonate decarboxylase%2C gamma subunit                                                                  | mdcE | 0.78  | 1.72 | 0.00 |
| ABAYE2235 | putative tetracycline resistance protein                                                                 |      | -0.76 | 0.59 | 0.00 |
| ABAYE2237 | conserved hypothetical protein%3B putative negative transcriptional regulator                            |      | 0.66  | 1.58 | 0.01 |
| ABAYE2244 | conserved hypothetical protein%3B putative glutathione S-transferase enzyme with thioredoxin-like domain |      | 0.63  | 1.55 | 0.00 |
| ABAYE2245 | putative transcriptional regulator (LysR family)                                                         |      | 0.51  | 1.42 | 0.03 |
| ABAYE2253 | putative amino acid transport protein (ABC superfamily%2C peri_bind)                                     |      | -0.34 | 0.79 | 0.03 |
| ABAYE2256 | putative amino acid transport protein (ABC superfamily%2C membrane)                                      |      | 0.56  | 1.47 | 0.02 |
| ABAYE2258 | conserved hypothetical protein%3B putative acetyltransferase                                             |      | 0.77  | 1.71 | 0.00 |
| ABAYE2260 | putative two-component sensor kinase                                                                     |      | -0.60 | 0.66 | 0.03 |
| ABAYE2265 | fragment of RecA-dependent DNA damage-inducible protein (partial)                                        | ddrR | 0.85  | 1.80 | 0.03 |
| ABAYE2267 | hypothetical protein                                                                                     |      | 0.75  | 1.68 | 0.00 |
| ABAYE2268 | hypothetical protein                                                                                     |      | 2.30  | 4.92 | 0.00 |
| ABAYE2269 | putative Short-chain dehydrogenase/reductase                                                             |      | 0.39  | 1.31 | 0.03 |
| ABAYE2270 | Catalase hydroperoxidase II                                                                              | katE | 1.30  | 2.46 | 0.00 |



|           |                                                                                                                  |      |       |      |      |
|-----------|------------------------------------------------------------------------------------------------------------------|------|-------|------|------|
| ABAYE2271 | conserved hypothetical protein                                                                                   |      | 1.00  | 2.00 | 0.01 |
| ABAYE2276 | hypothetical protein                                                                                             |      | 1.50  | 2.83 | 0.02 |
| ABAYE2277 | hypothetical protein%3B putative exported protein                                                                |      | 2.00  | 4.00 | 0.00 |
| ABAYE2281 | conserved hypothetical protein                                                                                   |      | -1.70 | 0.31 | 0.00 |
| ABAYE2282 | putative transcriptional regulator (LysR family)                                                                 |      | -1.10 | 0.47 | 0.00 |
| ABAYE2285 | conserved hypothetical protein%3B putative SAM-dependent methyltransferase                                       |      | 0.99  | 1.99 | 0.00 |
| ABAYE2286 | conserved hypothetical protein%3B putative AMP-dependent synthetase and ligase                                   |      | 0.90  | 1.87 | 0.00 |
| ABAYE2287 | putative transcriptional regulator (TetR family)                                                                 |      | 0.61  | 1.53 | 0.01 |
| ABAYE2289 | conserved hypothetical protein%3B putative Carboxyl transferase domain                                           |      | 1.10  | 2.14 | 0.01 |
| ABAYE2290 | 3-methylglutaconyl-CoA hydratase                                                                                 | mgh  | 1.60  | 3.03 | 0.00 |
| ABAYE2291 | conserved hypothetical protein%3B putative Biotin carboxylase                                                    |      | 1.60  | 3.03 | 0.00 |
| ABAYE2292 | putative Hydroxymethylglutaryl-CoA lyase (HMG-CoA lyase) (HL) (3-hydroxy-3-methylglutarate-CoA lyase)(MvaB-like) |      | 1.60  | 3.03 | 0.00 |
| ABAYE2295 | conserved hypothetical protein                                                                                   |      | 0.57  | 1.48 | 0.02 |
| ABAYE2302 | transport protein in catabolism of dicarboxylic acids (MFS superfamily)                                          | dcaK | 0.58  | 1.49 | 0.02 |
| ABAYE2303 | acyl-CoA dehydrogenase                                                                                           | dcaA | 0.92  | 1.89 | 0.03 |
| ABAYE2304 | enoyl-CoA hydratase                                                                                              | dcaE | 1.20  | 2.30 | 0.01 |
| ABAYE2305 | oxidoreductase%3B putative ketoacyl-CoA reductase                                                                | dcaC | 1.20  | 2.30 | 0.01 |

|           |                                                                          |       |      |      |      |
|-----------|--------------------------------------------------------------------------|-------|------|------|------|
| ABAYE2306 | dehydrogenase                                                            | dcaH  | 0.76 | 1.69 | 0.04 |
| ABAYE2307 | beta-ketoadipyl CoA thiolase                                             | dcaF  | 0.95 | 1.93 | 0.04 |
| ABAYE2309 | putative transport protein (MFS superfamily)                             |       | 0.69 | 1.61 | 0.00 |
| ABAYE2310 | conserved hypothetical protein%3B putative 2-nitropropane dioxygenase    |       | 1.10 | 2.14 | 0.01 |
| ABAYE2311 | conserved hypothetical protein%3B putative Enoyl-CoA hydratase/isomerase |       | 0.84 | 1.79 | 0.05 |
| ABAYE2312 | transcriptional regulator (IclR family)                                  | dcaS  | 0.53 | 1.44 | 0.03 |
| ABAYE2314 | L-carnitine dehydrogenase                                                | caiB  | 0.90 | 1.87 | 0.01 |
| ABAYE2315 | acyl-CoA dehydrogenase                                                   | dcaA  | 1.90 | 3.73 | 0.00 |
| ABAYE2316 | cis%2Ccis-muconate transport protein (MFS superfamily)                   | muckK | 0.64 | 1.56 | 0.04 |
| ABAYE2318 | 2-aminoethylphosphonate:pyruvate transaminase                            | phnW  | 0.75 | 1.68 | 0.00 |
| ABAYE2319 | putative FAD dependent oxidoreductase                                    |       | 0.98 | 1.97 | 0.03 |
| ABAYE2320 | putative transport protein (ABC superfamily%2C membrane)                 |       | 1.30 | 2.46 | 0.01 |
| ABAYE2325 | p-hydroxybenzoate hydroxylase transcriptional activator                  | pobR  | 1.10 | 2.14 | 0.01 |
| ABAYE2327 | putative transcriptional regulator (LysR family)                         |       | 0.65 | 1.57 | 0.02 |
| ABAYE2330 | conserved hypothetical protein%3B putative exported protein              |       | 2.10 | 4.29 | 0.00 |
| ABAYE2331 | putative purine cytosine permease                                        |       | 1.10 | 2.14 | 0.00 |
| ABAYE2333 | putative aldehyde dehydrogenase                                          |       | 0.74 | 1.67 | 0.04 |
| ABAYE2335 | conserved hypothetical protein                                           |       | 1.20 | 2.30 | 0.01 |

|           |                                                                                       |      |       |      |      |
|-----------|---------------------------------------------------------------------------------------|------|-------|------|------|
| ABAYE2336 | conserved hypothetical protein                                                        |      | 1.20  | 2.30 | 0.04 |
| ABAYE2337 | conserved hypothetical protein                                                        |      | 1.20  | 2.30 | 0.01 |
| ABAYE2342 | conserved hypothetical protein%3B putative Catalase domain                            |      | 0.60  | 1.52 | 0.00 |
| ABAYE2345 | conserved hypothetical protein%3B putative acyl-CoA transferase/carnitine dehydratase |      | 0.55  | 1.46 | 0.04 |
| ABAYE2354 | hypothetical protein                                                                  |      | 2.10  | 4.29 | 0.00 |
| ABAYE2355 | hypothetical protein                                                                  |      | 0.65  | 1.57 | 0.01 |
| ABAYE2361 | putative helicase                                                                     |      | -0.78 | 0.58 | 0.00 |
| ABAYE2362 | hypothetical protein%3B putative endonuclease                                         |      | -0.86 | 0.55 | 0.00 |
| ABAYE2378 | putative amino acid transporter%3B putative L-serine transporter                      |      | 0.54  | 1.45 | 0.00 |
| ABAYE2379 | NADP-dependent fatty aldehyde dehydrogenase                                           | aldH | 0.84  | 1.79 | 0.00 |
| ABAYE2388 | putative Dihydrodipicolinate synthetase                                               |      | 0.93  | 1.91 | 0.00 |
| ABAYE2392 | conserved hypothetical protein                                                        |      | -1.70 | 0.31 | 0.00 |
| ABAYE2393 | putative acetyltransferase                                                            |      | -0.87 | 0.55 | 0.00 |
| ABAYE2395 | putative cyanate transport protein (CYNX)(MFS family)                                 |      | 0.47  | 1.39 | 0.00 |
| ABAYE2399 | conserved hypothetical protein%3B putative exported protein                           |      | -0.55 | 0.68 | 0.01 |
| ABAYE2400 | conserved hypothetical protein%3B putative exported protein                           |      | -0.69 | 0.62 | 0.00 |
| ABAYE2401 | conserved hypothetical protein                                                        |      | -0.74 | 0.60 | 0.00 |

|           |                                                             |  |       |      |      |
|-----------|-------------------------------------------------------------|--|-------|------|------|
| ABAYE2402 | conserved hypothetical protein                              |  | -0.86 | 0.55 | 0.00 |
| ABAYE2403 | conserved hypothetical protein                              |  | -0.75 | 0.59 | 0.00 |
| ABAYE2404 | putative ClpA/B-type chaperone                              |  | -0.92 | 0.53 | 0.00 |
| ABAYE2405 | conserved hypothetical protein                              |  | -1.10 | 0.47 | 0.00 |
| ABAYE2406 | putative outer membrane lipoprotein                         |  | -1.20 | 0.44 | 0.00 |
| ABAYE2407 | conserved hypothetical protein                              |  | -1.00 | 0.50 | 0.00 |
| ABAYE2408 | conserved hypothetical protein%3B putative membrane protein |  | -1.30 | 0.41 | 0.00 |
| ABAYE2409 | conserved hypothetical protein                              |  | -1.40 | 0.38 | 0.00 |
| ABAYE2410 | conserved hypothetical protein                              |  | -1.30 | 0.41 | 0.00 |
| ABAYE2411 | conserved hypothetical protein                              |  | -4.60 | 0.04 | 0.00 |
| ABAYE2412 | conserved hypothetical protein                              |  | -5.70 | 0.02 | 0.00 |
| ABAYE2413 | conserved hypothetical protein                              |  | -8.20 | 0.00 | 0.00 |
| ABAYE2414 | conserved hypothetical protein                              |  | -7.50 | 0.01 | 0.00 |
| ABAYE2415 | conserved hypothetical protein                              |  | -6.40 | 0.01 | 0.00 |
| ABAYE2416 | conserved hypothetical protein                              |  | -6.00 | 0.02 | 0.00 |
| ABAYE2418 | conserved hypothetical protein                              |  | -5.60 | 0.02 | 0.00 |
| ABAYE2419 | putative transport protein (ABC superfamily%2C membrane)    |  | -4.30 | 0.05 | 0.00 |
| ABAYE2420 | putative transport protein (ABC superfamily%2C atp_bind)    |  | -3.00 | 0.13 | 0.00 |

|           |                                                                                                                                                                             |      |       |      |      |
|-----------|-----------------------------------------------------------------------------------------------------------------------------------------------------------------------------|------|-------|------|------|
| ABAYE2421 | putative transport protein (ABC superfamily%2C peri_bind)                                                                                                                   |      | -3.40 | 0.09 | 0.00 |
| ABAYE2422 | putative amidase                                                                                                                                                            |      | -3.60 | 0.08 | 0.00 |
| ABAYE2423 | putative transcriptional regulator                                                                                                                                          |      | -1.10 | 0.47 | 0.01 |
| ABAYE2425 | putative HTH-type transcriptional regulator                                                                                                                                 |      | -2.20 | 0.22 | 0.00 |
| ABAYE2426 | conserved hypothetical protein%3B putative NAD(P)H dehydrogenase (quinone)                                                                                                  |      | -3.30 | 0.10 | 0.00 |
| ABAYE2427 | putative Biotin carboxyl carrier protein                                                                                                                                    |      | -1.20 | 0.44 | 0.04 |
| ABAYE2428 | putative multifunctional protein [Includes: putative Carbamoyl-phosphate synthase L chain%3B putative Biotin carboxylase%3B putative Allophanate hydrolase subunit 2 and 1] |      | -4.70 | 0.04 | 0.00 |
| ABAYE2429 | conserved hypothetical protein                                                                                                                                              |      | -1.50 | 0.35 | 0.00 |
| ABAYE2430 | conserved hypothetical protein                                                                                                                                              |      | -2.70 | 0.15 | 0.00 |
| ABAYE2431 | putative zinc-type alcohol dehydrogenase-like protein                                                                                                                       |      | -2.50 | 0.18 | 0.00 |
| ABAYE2432 | conserved hypothetical protein                                                                                                                                              |      | -5.10 | 0.03 | 0.00 |
| ABAYE2434 | hypothetical protein%3B putative exported protein                                                                                                                           |      | -6.80 | 0.01 | 0.00 |
| ABAYE2435 | hypothetical protein%3B putative exported protein                                                                                                                           |      | -7.00 | 0.01 | 0.00 |
| ABAYE2436 | conserved hypothetical protein                                                                                                                                              |      | -6.10 | 0.01 | 0.00 |
| ABAYE2437 | conserved hypothetical protein%3B putative chloride transport protein                                                                                                       |      | -5.70 | 0.02 | 0.00 |
| ABAYE2438 | Acetyl-/propionyl-coenzyme A carboxylase alpha chain [Includes: Biotin carboxylase %3B Biotin carboxyl carrier protein (BCCP)]                                              | bccA | -5.00 | 0.03 | 0.00 |

|           |                                                             |  |       |      |      |
|-----------|-------------------------------------------------------------|--|-------|------|------|
| ABAYE2439 | putative allophanate hydrolase subunit 1 and 2              |  | -4.10 | 0.06 | 0.00 |
| ABAYE2440 | conserved hypothetical protein                              |  | -3.60 | 0.08 | 0.00 |
| ABAYE2441 | putative lactam utilization protein                         |  | -3.90 | 0.07 | 0.00 |
| ABAYE2442 | conserved hypothetical protein%3B putative membrane protein |  | -4.10 | 0.06 | 0.00 |
| ABAYE2443 | putative transcriptional regulator (LysR family)            |  | -4.70 | 0.04 | 0.00 |
| ABAYE2444 | hypothetical protein%3B putative exported protein           |  | -5.00 | 0.03 | 0.00 |
| ABAYE2445 | hypothetical protein                                        |  | -5.10 | 0.03 | 0.00 |
| ABAYE2446 | hypothetical protein                                        |  | -4.90 | 0.03 | 0.00 |
| ABAYE2447 | hypothetical protein                                        |  | -4.40 | 0.05 | 0.00 |
| ABAYE2449 | hypothetical protein                                        |  | -3.90 | 0.07 | 0.00 |
| ABAYE2450 | fragment of putative Rhs family protein (part 2)            |  | -5.30 | 0.03 | 0.00 |
| ABAYE2452 | transposase of ISAb1%2C IS4 family (ORF 1)                  |  | -0.96 | 0.51 | 0.00 |
| ABAYE2453 | fragment of putative Rhs family protein (part 1)            |  | -7.90 | 0.00 | 0.00 |
| ABAYE2454 | conserved hypothetical protein                              |  | -8.40 | 0.00 | 0.00 |
| ABAYE2456 | putative beta-lactamase                                     |  | -5.50 | 0.02 | 0.00 |
| ABAYE2457 | putative acetyltransferase                                  |  | -3.00 | 0.13 | 0.00 |
| ABAYE2458 | hypothetical protein                                        |  | -3.70 | 0.08 | 0.00 |
| ABAYE2459 | hypothetical protein                                        |  | -2.80 | 0.14 | 0.00 |

|           |                                                                             |      |       |      |      |
|-----------|-----------------------------------------------------------------------------|------|-------|------|------|
| ABAYE2460 | putative hydroxyacyl-CoA dehydrogenase                                      |      | -5.00 | 0.03 | 0.00 |
| ABAYE2461 | conserved hypothetical protein                                              |      | -3.70 | 0.08 | 0.00 |
| ABAYE2463 | hypothetical protein%3B putative exported protein                           |      | -7.10 | 0.01 | 0.00 |
| ABAYE2464 | conserved hypothetical protein%3B putative exported protein                 |      | -6.20 | 0.01 | 0.00 |
| ABAYE2465 | putative Permease of the major facilitator superfamily                      |      | -5.00 | 0.03 | 0.00 |
| ABAYE2468 | putative lipid A biosynthesis acyltransferase                               |      | -6.40 | 0.01 | 0.00 |
| ABAYE2469 | hypothetical protein                                                        |      | -3.20 | 0.11 | 0.00 |
| ABAYE2470 | hypothetical protein%3B putative membrane protein                           |      | -4.00 | 0.06 | 0.00 |
| ABAYE2471 | conserved hypothetical protein%3B putative membrane protein                 |      | -3.60 | 0.08 | 0.00 |
| ABAYE2476 | methyl-directed mismatch repair%2C recognize exocyclic adducts of guanosine | mutS | 0.26  | 1.20 | 0.03 |
| ABAYE2480 | conserved hypothetical protein%3B putative exported protein                 |      | 0.50  | 1.41 | 0.01 |
| ABAYE2484 | conserved hypothetical protein                                              |      | -0.40 | 0.76 | 0.05 |
| ABAYE2497 | hypothetical protein                                                        |      | -1.30 | 0.41 | 0.00 |
| ABAYE2498 | conserved hypothetical protein%3B putative exported protein                 |      | -0.92 | 0.53 | 0.00 |
| ABAYE2501 | hypothetical protein%3B putative exported protein                           |      | -0.82 | 0.57 | 0.00 |
| ABAYE2503 | hypothetical protein%3B putative exported protein                           |      | 0.70  | 1.62 | 0.00 |
| ABAYE2504 | fragment of conserved hypothetical protein                                  |      | 0.72  | 1.65 | 0.00 |

|           |                                                                                                                                                                                                                     |      |       |      |      |
|-----------|---------------------------------------------------------------------------------------------------------------------------------------------------------------------------------------------------------------------|------|-------|------|------|
| ABAYE2506 | conserved hypothetical protein                                                                                                                                                                                      |      | 0.73  | 1.66 | 0.00 |
| ABAYE2508 | conserved hypothetical protein                                                                                                                                                                                      |      | -0.86 | 0.55 | 0.01 |
| ABAYE2509 | hypothetical protein                                                                                                                                                                                                |      | -0.90 | 0.54 | 0.01 |
| ABAYE2516 | hypothetical protein                                                                                                                                                                                                |      | 0.73  | 1.66 | 0.00 |
| ABAYE2519 | hypothetical protein                                                                                                                                                                                                |      | 1.20  | 2.30 | 0.00 |
| ABAYE2520 | hypothetical protein%3B putative exported protein                                                                                                                                                                   |      | 1.10  | 2.14 | 0.00 |
| ABAYE2522 | hypothetical protein                                                                                                                                                                                                |      | -0.50 | 0.71 | 0.02 |
| ABAYE2525 | hypothetical protein%3B putative exported protein                                                                                                                                                                   |      | 1.60  | 3.03 | 0.00 |
| ABAYE2530 | hypothetical protein                                                                                                                                                                                                |      | -0.54 | 0.69 | 0.01 |
| ABAYE2532 | hypothetical protein%3B putative exported protein                                                                                                                                                                   |      | 0.95  | 1.93 | 0.00 |
| ABAYE2536 | conserved hypothetical protein%3B putative Amino acid efflux-like protein                                                                                                                                           |      | -0.83 | 0.56 | 0.00 |
| ABAYE2539 | hypothetical protein                                                                                                                                                                                                |      | 1.10  | 2.14 | 0.04 |
| ABAYE2546 | conserved hypothetical protein                                                                                                                                                                                      |      | 0.45  | 1.37 | 0.04 |
| ABAYE2548 | conserved hypothetical protein                                                                                                                                                                                      |      | 0.65  | 1.57 | 0.00 |
| ABAYE2557 | benzoate 1%2C2-dioxygenase electron transfer component [Includes: Ferredoxin%3B Ferredoxin--NAD(+) reductase]                                                                                                       | benC | 1.10  | 2.14 | 0.00 |
| ABAYE2558 | cis-1%2C2-dihydroxycyclohexa-3%2C 5-diene-1-carboxylate dehydrogenase%2C(cis-1%2C2-dihydroxy-3%2C 4-cyclohexadiene-1-carboxylate dehydrogenase) (2-hydro-1%2C2-dihydroxybenzoate dehydrogenase) (DHB dehydrogenase) | benD | 0.89  | 1.85 | 0.00 |



|           |                                                                                |      |       |      |      |
|-----------|--------------------------------------------------------------------------------|------|-------|------|------|
| ABAYE2560 | benzoate transport protein (MFS superfamily)                                   | benK | 0.47  | 1.39 | 0.03 |
| ABAYE2566 | O-methyl transferase                                                           | mdmC | 0.26  | 1.20 | 0.04 |
| ABAYE2567 | conserved hypothetical protein                                                 |      | 0.60  | 1.52 | 0.02 |
| ABAYE2569 | conserved hypothetical protein%3B putative exported protein                    |      | 0.85  | 1.80 | 0.00 |
| ABAYE2571 | putative extracellular nuclease                                                |      | 0.26  | 1.20 | 0.05 |
| ABAYE2575 | conserved hypothetical protein%3B putative bacterial outer membrane domain     |      | 0.66  | 1.58 | 0.01 |
| ABAYE2585 | putative peptidase%2C M23/M37 family                                           |      | 0.45  | 1.37 | 0.00 |
| ABAYE2586 | putative acyltransferase%3B acyltransferase for phosphonate utilization (PhnO) |      | 0.70  | 1.62 | 0.00 |
| ABAYE2588 | cyclic AMP receptor protein                                                    | vfr  | -0.58 | 0.67 | 0.02 |
| ABAYE2589 | putative oxidoreductase%2C aldo/keto reductase family                          |      | 0.58  | 1.49 | 0.01 |
| ABAYE2594 | D-erythrose 4-phosphate dehydrogenase                                          | epd  | 0.31  | 1.24 | 0.02 |
| ABAYE2600 | putative cytochrome                                                            |      | 0.52  | 1.43 | 0.03 |
| ABAYE2602 | putative transporter                                                           |      | -0.32 | 0.80 | 0.05 |
| ABAYE2604 | conserved hypothetical protein%3B putative exported protein                    |      | -1.70 | 0.31 | 0.00 |
| ABAYE2608 | conserved hypothetical protein                                                 |      | 0.67  | 1.59 | 0.01 |
| ABAYE2616 | putative transcriptional regulator                                             |      | 0.56  | 1.47 | 0.02 |
| ABAYE2618 | putative short-chain dehydrogenase                                             |      | 0.79  | 1.73 | 0.04 |
| ABAYE2619 | putative Acetyl esterase                                                       |      | 0.81  | 1.75 | 0.04 |

|           |                                                                                        |      |       |      |      |
|-----------|----------------------------------------------------------------------------------------|------|-------|------|------|
| ABAYE2621 | putative porin for vanillate trafficking (VanP)                                        |      | 0.55  | 1.46 | 0.01 |
| ABAYE2622 | vanillate transporter (MFS superfamily)                                                | vanK | 1.00  | 2.00 | 0.00 |
| ABAYE2623 | vanillate O-demethylase oxygenase subunit (4-hydroxy-3-methoxybenzoate demethylase)    | vanA | 1.90  | 3.73 | 0.00 |
| ABAYE2624 | vanillate O-demethylase oxidoreductase (Vanillate degradation ferredoxin-like protein) | vanB | 0.59  | 1.51 | 0.02 |
| ABAYE2634 | conserved hypothetical protein                                                         |      | 1.60  | 3.03 | 0.00 |
| ABAYE2636 | transposase of ISAb1%2C IS4 family (ORF 1)                                             |      | -0.37 | 0.77 | 0.01 |
| ABAYE2643 | transposase of ISAb1%2C IS4 family (ORF 1)                                             |      | -0.37 | 0.77 | 0.04 |
| ABAYE2645 | fragment of conserved hypothetical protein%3B putative membrane protein                |      | -0.60 | 0.66 | 0.01 |
| ABAYE2649 | transposase of ISAb1%2C IS4 family (ORF 2)                                             |      | -0.46 | 0.73 | 0.02 |
| ABAYE2651 | hypothetical protein%3B putative membrane protein                                      |      | -1.00 | 0.50 | 0.01 |
| ABAYE2652 | hypothetical protein%3B putative Rhs family protein                                    |      | -0.80 | 0.57 | 0.01 |
| ABAYE2653 | hypothetical protein%3B putative Rhs family protein                                    |      | -0.79 | 0.58 | 0.02 |
| ABAYE2654 | hypothetical protein%3B putative exported protein                                      |      | -0.68 | 0.62 | 0.03 |
| ABAYE2656 | hypothetical protein%3B putative exported protein                                      |      | -0.79 | 0.58 | 0.01 |
| ABAYE2665 | conserved hypothetical protein                                                         |      | -2.40 | 0.19 | 0.00 |
| ABAYE2666 | putative NADH pyrophosphatase (NUDIX hydrolase family)(NudC)                           |      | -0.41 | 0.75 | 0.00 |
| ABAYE2668 | conserved hypothetical protein%3B putative exported protein                            |      | 0.52  | 1.43 | 0.00 |

|           |                                                                                                                             |      |       |      |      |
|-----------|-----------------------------------------------------------------------------------------------------------------------------|------|-------|------|------|
| ABAYE2672 | inhibitor of replication initiation (transcriptional regulator of dnaA and argK (affects arginine transport) (LysR family)) | iciA | -0.35 | 0.78 | 0.05 |
| ABAYE2676 | conserved hypothetical protein                                                                                              |      | -0.46 | 0.73 | 0.04 |
| ABAYE2682 | conserved hypothetical protein                                                                                              |      | 0.42  | 1.34 | 0.01 |
| ABAYE2689 | conserved hypothetical protein                                                                                              |      | 0.74  | 1.67 | 0.02 |
| ABAYE2690 | hypothetical protein%3B putative membrane protein                                                                           |      | 1.30  | 2.46 | 0.04 |
| ABAYE2695 | hypothetical protein%3B putative acetyltransferase%2C GNAT family                                                           |      | -0.51 | 0.70 | 0.04 |
| ABAYE2699 | hypothetical protein                                                                                                        |      | -0.85 | 0.55 | 0.00 |
| ABAYE2700 | hypothetical protein%3B putative exported protein                                                                           |      | -0.91 | 0.53 | 0.00 |
| ABAYE2712 | hypothetical protein                                                                                                        |      | 0.58  | 1.49 | 0.02 |
| ABAYE2730 | conserved hypothetical protein                                                                                              |      | 0.63  | 1.55 | 0.02 |
| ABAYE2731 | conserved hypothetical protein                                                                                              |      | 0.84  | 1.79 | 0.02 |
| ABAYE2732 | conserved hypothetical protein                                                                                              |      | 1.30  | 2.46 | 0.01 |
| ABAYE2733 | hypothetical protein                                                                                                        |      | 1.20  | 2.30 | 0.03 |
| ABAYE2735 | hypothetical protein%3B putative exported protein                                                                           |      | 1.40  | 2.64 | 0.04 |
| ABAYE2736 | fragment of conserved hypothetical protein                                                                                  |      | 0.99  | 1.99 | 0.04 |
| ABAYE2738 | hypothetical protein                                                                                                        |      | 1.10  | 2.14 | 0.00 |
| ABAYE2741 | conserved hypothetical protein                                                                                              |      | 1.00  | 2.00 | 0.02 |

|           |                                                                                                             |      |       |      |      |
|-----------|-------------------------------------------------------------------------------------------------------------|------|-------|------|------|
| ABAYE2742 | putative replicative DNA helicase                                                                           |      | 0.76  | 1.69 | 0.01 |
| ABAYE2751 | conserved hypothetical protein                                                                              |      | 0.71  | 1.64 | 0.01 |
| ABAYE2752 | hypothetical protein%3B putative phage-related protein                                                      |      | 0.78  | 1.72 | 0.01 |
| ABAYE2763 | conserved hypothetical protein%3B putative exported protein                                                 |      | 1.50  | 2.83 | 0.00 |
| ABAYE2777 | urease beta subunit                                                                                         | ureB | -0.36 | 0.78 | 0.04 |
| ABAYE2779 | urease accessory protein                                                                                    | ureD | -0.70 | 0.62 | 0.02 |
| ABAYE2782 | putative lipoprotein                                                                                        |      | 1.30  | 2.46 | 0.00 |
| ABAYE2783 | isocitrate lyase                                                                                            | aceA | -0.93 | 0.52 | 0.00 |
| ABAYE2787 | citrate transporter                                                                                         | citN | 0.45  | 1.37 | 0.04 |
| ABAYE2791 | sulfate adenylyltransferase subunit 2 (Sulfate adenylate transferase) (SAT) (ATP-sulfurylase small subunit) | cysD | 0.34  | 1.27 | 0.04 |
| ABAYE2792 | conserved hypothetical protein                                                                              |      | 0.49  | 1.40 | 0.03 |
| ABAYE2793 | conserved hypothetical protein%3B putative exported protein                                                 |      | 0.38  | 1.30 | 0.04 |
| ABAYE2802 | conserved hypothetical protein%3B putative signal peptide                                                   |      | -0.77 | 0.59 | 0.03 |
| ABAYE2805 | conserved hypothetical protein%3B putative membrane protein                                                 |      | -0.32 | 0.80 | 0.02 |
| ABAYE2807 | putative transport protein (ABC superfamily%2C atp_bind)                                                    |      | 0.57  | 1.48 | 0.01 |
| ABAYE2808 | multifunctional protein [Includes: acyl-CoA thioesterase I%3B protease I%3B lysophospholipaseL(I)]          | tesA | 0.40  | 1.32 | 0.03 |
| ABAYE2810 | lipase                                                                                                      | lip1 | 0.28  | 1.21 | 0.05 |

|           |                                                                  |      |       |      |      |
|-----------|------------------------------------------------------------------|------|-------|------|------|
| ABAYE2812 | ferric enterobactin receptor precursor                           | pfeA | -2.00 | 0.25 | 0.00 |
| ABAYE2816 | conserved hypothetical protein%3B putative exported protein      |      | -1.60 | 0.33 | 0.00 |
| ABAYE2817 | conserved hypothetical protein%3B putative lipoprotein precursor |      | -0.96 | 0.51 | 0.02 |
| ABAYE2823 | putative transketolase C-terminal section                        |      | 0.75  | 1.68 | 0.00 |
| ABAYE2824 | putative transketolase N-terminal section                        |      | 0.54  | 1.45 | 0.03 |
| ABAYE2829 | Aldose 1-epimerase precursor (Mutarotase)                        |      | 1.10  | 2.14 | 0.00 |
| ABAYE2830 | fosmidomycin/multidrug transport protein (MFS superfamily)       | fsr  | 0.38  | 1.30 | 0.01 |
| ABAYE2831 | putative transcriptional regulator (AraC family)                 |      | -0.36 | 0.78 | 0.05 |
| ABAYE2832 | putative Glutaminase                                             |      | -0.82 | 0.57 | 0.00 |
| ABAYE2834 | putative permease (MFS superfamily)                              |      | 0.64  | 1.56 | 0.00 |
| ABAYE2835 | conserved hypothetical protein%3B putative exported protein      |      | 0.71  | 1.64 | 0.00 |
| ABAYE2836 | putative acetolactate synthase (IlvB-like)                       |      | 0.91  | 1.88 | 0.00 |
| ABAYE2837 | putative aldehyde dehydrogenase                                  |      | 1.30  | 2.46 | 0.00 |
| ABAYE2838 | putative L-aspartate dehydrogenase (NadX)                        |      | 1.30  | 2.46 | 0.00 |
| ABAYE2839 | putative short-chain dehydrogenase                               |      | 0.91  | 1.88 | 0.01 |
| ABAYE2840 | putative hydrolase                                               |      | 0.81  | 1.75 | 0.02 |
| ABAYE2841 | conserved hypothetical protein                                   |      | 1.20  | 2.30 | 0.02 |
| ABAYE2842 | putative permease (MFS superfamily)                              |      | 0.89  | 1.85 | 0.03 |

|           |                                                                             |      |       |       |      |
|-----------|-----------------------------------------------------------------------------|------|-------|-------|------|
| ABAYE2844 | putative dioxygenase                                                        |      | 0.73  | 1.66  | 0.00 |
| ABAYE2846 | putative vanillate O-demethylase oxygenase subunit (VanA-like)              |      | 0.70  | 1.62  | 0.02 |
| ABAYE2847 | conserved hypothetical protein                                              |      | 1.70  | 3.25  | 0.00 |
| ABAYE2851 | putative nucleoside/purine/pyrimidine transport protein (NMN family) (PnuC) |      | 0.56  | 1.47  | 0.04 |
| ABAYE2855 | putative lipoprotein (Haemin storage system) (HmsF)                         |      | -0.61 | 0.66  | 0.01 |
| ABAYE2859 | conserved hypothetical protein                                              |      | 0.72  | 1.65  | 0.00 |
| ABAYE2861 | conserved hypothetical protein%3B putative exported protein                 |      | 3.50  | 11.31 | 0.00 |
| ABAYE2863 | putative membrane protein                                                   |      | 0.88  | 1.84  | 0.00 |
| ABAYE2864 | high-affinity choline transporter (BCCT family)                             | betT | 0.83  | 1.78  | 0.00 |
| ABAYE2865 | putative choline/carnitine/betaine transporter family protein               |      | 1.10  | 2.14  | 0.00 |
| ABAYE2866 | repressor of bet genes                                                      | betI | 0.85  | 1.80  | 0.02 |
| ABAYE2867 | NAD+-dependent betaine aldehyde dehydrogenase                               | betB | 0.86  | 1.82  | 0.05 |
| ABAYE2868 | choline dehydrogenase%2C a flavoprotein                                     | betA | 0.70  | 1.62  | 0.04 |
| ABAYE2869 | malate dehydrogenase%2C FAD/NAD(P)-binding domain                           | mgo  | -0.36 | 0.78  | 0.04 |
| ABAYE2880 | hypothetical protein%3B putative exported protein                           |      | 1.30  | 2.46  | 0.03 |
| ABAYE2881 | hypothetical protein                                                        |      | 0.87  | 1.83  | 0.02 |
| ABAYE2883 | conserved hypothetical protein                                              |      | -1.00 | 0.50  | 0.00 |
| ABAYE2884 | putative TatD-related deoxyribonuclease from bacteriophage                  |      | -0.62 | 0.65  | 0.00 |

|           |                                                                      |      |       |      |      |
|-----------|----------------------------------------------------------------------|------|-------|------|------|
| ABAYE2885 | conserved hypothetical protein from bacteriophage                    |      | -1.20 | 0.44 | 0.00 |
| ABAYE2886 | conserved hypothetical protein from bacteriophage                    |      | -1.30 | 0.41 | 0.00 |
| ABAYE2887 | conserved hypothetical protein from bacteriophage                    |      | -1.70 | 0.31 | 0.00 |
| ABAYE2891 | hypothetical protein%3B putative membrane protein from bacteriophage |      | -0.81 | 0.57 | 0.00 |
| ABAYE2892 | putative nucleoid-associated protein from bacteriophage              |      | -0.84 | 0.56 | 0.00 |
| ABAYE2894 | hypothetical protein from bacteriophage                              |      | -0.67 | 0.63 | 0.02 |
| ABAYE2895 | hypothetical protein from bacteriophage                              |      | -0.64 | 0.64 | 0.02 |
| ABAYE2899 | conserved hypothetical protein from bacteriophage                    |      | -1.00 | 0.50 | 0.00 |
| ABAYE2900 | hypothetical protein from bacteriophage                              |      | -0.73 | 0.60 | 0.00 |
| ABAYE2901 | conserved hypothetical protein from bacteriophage                    |      | -0.96 | 0.51 | 0.00 |
| ABAYE2902 | hypothetical protein from bacteriophage                              |      | -0.78 | 0.58 | 0.03 |
| ABAYE2904 | putative site-specific recombinase%2C integrase from bacteriophage   |      | -0.40 | 0.76 | 0.03 |
| ABAYE2905 | gamma-glutamyltranspeptidase precursor                               | ggt  | 0.31  | 1.24 | 0.04 |
| ABAYE2918 | twitching motility protein                                           | pilT | -3.30 | 0.10 | 0.00 |
| ABAYE2919 | twitching motility protein                                           | pilU | -2.90 | 0.13 | 0.00 |
| ABAYE2924 | conserved hypothetical protein%3B putative Hemerythrin-like protein  |      | -2.30 | 0.20 | 0.00 |
| ABAYE2928 | phosphomannomutase                                                   | algC | 0.35  | 1.27 | 0.03 |
| ABAYE2931 | putative outer membrane protein                                      |      | 0.59  | 1.51 | 0.00 |

|           |                                                                                       |      |       |      |      |
|-----------|---------------------------------------------------------------------------------------|------|-------|------|------|
| ABAYE2933 | conserved hypothetical protein                                                        |      | 0.64  | 1.56 | 0.01 |
| ABAYE2934 | cell division inhibitor%2C inhibits ftsZ ring formation                               | minC | 0.36  | 1.28 | 0.01 |
| ABAYE2935 | cell division inhibitor%2C a membrane ATPase%2Cactivates minC                         | minD | 0.27  | 1.21 | 0.03 |
| ABAYE2937 | conserved hypothetical protein                                                        |      | 0.61  | 1.53 | 0.01 |
| ABAYE2945 | conserved hypothetical protein                                                        |      | 0.48  | 1.39 | 0.00 |
| ABAYE2946 | protein chain elongation factor EF-Tu (duplicate of tufB)                             | tufA | -0.65 | 0.64 | 0.00 |
| ABAYE2947 | protein chain elongation factor EF-G%2C GTP-binding                                   | fusA | -0.58 | 0.67 | 0.00 |
| ABAYE2949 | 30S ribosomal protein S12                                                             | rpsL | -0.24 | 0.85 | 0.03 |
| ABAYE2957 | putative dioxygenase beta subunit                                                     |      | 1.00  | 2.00 | 0.00 |
| ABAYE2958 | Succinate-semialdehyde dehydrogenase [NADP+] (SSDH)                                   | gabD | 1.20  | 2.30 | 0.00 |
| ABAYE2959 | fragment of putative dioxygenase alpha subunit (part 2)                               |      | 1.10  | 2.14 | 0.00 |
| ABAYE2960 | transposase of IS10A%2C IS4 family                                                    |      | 0.96  | 1.95 | 0.00 |
| ABAYE2961 | fragment of putative dioxygenase alpha subunit (part 1)                               |      | 0.66  | 1.58 | 0.02 |
| ABAYE2962 | putative Lipase                                                                       |      | 1.30  | 2.46 | 0.00 |
| ABAYE2963 | putative BCCT family transporter                                                      |      | 1.00  | 2.00 | 0.01 |
| ABAYE2964 | tartrate dehydrogenase/decarboxylase (TDH) (D-malate dehydrogenase [decarboxylating]) |      | 0.92  | 1.89 | 0.00 |
| ABAYE2965 | putative transcriptional regulator (LysR family)                                      |      | 0.73  | 1.66 | 0.00 |



|           |                                                                         |      |       |      |      |
|-----------|-------------------------------------------------------------------------|------|-------|------|------|
| ABAYE2966 | conserved hypothetical protein%3B putative exported protein             |      | -0.32 | 0.80 | 0.02 |
| ABAYE2978 | outer-membrane lipoprotein precursor                                    | lolB | 0.31  | 1.24 | 0.04 |
| ABAYE2988 | putative hydrolase                                                      |      | 0.30  | 1.23 | 0.02 |
| ABAYE2990 | conserved hypothetical protein                                          |      | 0.90  | 1.87 | 0.00 |
| ABAYE3001 | dethiobiotin synthetase (Dethiobiotin synthase) (DTB synthetase) (DTBS) | bioD | 0.55  | 1.46 | 0.03 |
| ABAYE3002 | putative biotin biosynthesis protein (BioC)                             |      | 0.70  | 1.62 | 0.00 |
| ABAYE3003 | 8-amino-7-oxononanoate synthase                                         | bioF | 0.60  | 1.52 | 0.00 |
| ABAYE3004 | adenosylmethionine-8-amino-7-oxononanoate aminotransferase              | bioA | 0.43  | 1.35 | 0.01 |
| ABAYE3007 | trehalose-6-phosphate synthase                                          | otsA | 0.67  | 1.59 | 0.01 |
| ABAYE3008 | putative transport protein (permease)                                   |      | 0.75  | 1.68 | 0.01 |
| ABAYE3011 | putative cell division protein (ZipA-like)                              |      | 0.33  | 1.26 | 0.04 |
| ABAYE3030 | conserved hypothetical protein                                          |      | 1.60  | 3.03 | 0.00 |
| ABAYE3034 | putative transcriptional regulator (TetR family )                       |      | 0.76  | 1.69 | 0.01 |
| ABAYE3035 | putative transporter (MFS superfamily)                                  |      | 0.51  | 1.42 | 0.01 |
| ABAYE3036 | putative multidrug resistance efflux pump                               |      | 0.57  | 1.48 | 0.01 |
| ABAYE3040 | conserved hypothetical protein%3B putative membrane protein             |      | 1.60  | 3.03 | 0.00 |
| ABAYE3041 | conserved hypothetical protein                                          |      | 1.10  | 2.14 | 0.00 |
| ABAYE3061 | putative membrane protein%3B putative GGDEF domain                      |      | -0.44 | 0.74 | 0.03 |

|           |                                                                      |      |       |      |      |
|-----------|----------------------------------------------------------------------|------|-------|------|------|
| ABAYE3063 | putative sensory histidine kinase in two-component regulatory system |      | 0.42  | 1.34 | 0.01 |
| ABAYE3068 | putative outermembrane protein exposed to the bacterial surface      |      | 2.00  | 4.00 | 0.00 |
| ABAYE3072 | hypothetical protein                                                 |      | -1.00 | 0.50 | 0.00 |
| ABAYE3078 | putative flavoprotein oxidoreductase                                 |      | -1.10 | 0.47 | 0.00 |
| ABAYE3079 | 5-methyltetrahydropteroyltriglutamate-homocysteine methyltransferase | metE | -1.40 | 0.38 | 0.00 |
| ABAYE3080 | conserved hypothetical protein                                       |      | -1.60 | 0.33 | 0.00 |
| ABAYE3083 | putative amino acid efflux protein (LysE family)                     |      | 1.00  | 2.00 | 0.00 |
| ABAYE3086 | putative hydrolase                                                   |      | -0.40 | 0.76 | 0.02 |
| ABAYE3089 | citrate-proton symporter (MFS superfamily)                           | citA | 0.52  | 1.43 | 0.02 |
| ABAYE3090 | putative substrate-binding protein (ABC superfamily%2C peri-bind)    |      | 1.00  | 2.00 | 0.05 |
| ABAYE3092 | conserved hypothetical protein                                       |      | 0.67  | 1.59 | 0.01 |
| ABAYE3093 | citrate utilization protein B                                        | citB | 0.79  | 1.73 | 0.01 |
| ABAYE3097 | glutaryl-CoA dehydrogenase                                           | gcdH | 0.50  | 1.41 | 0.04 |
| ABAYE3115 | conserved hypothetical protein                                       |      | 0.56  | 1.47 | 0.01 |
| ABAYE3118 | conserved hypothetical protein                                       |      | 0.49  | 1.40 | 0.02 |
| ABAYE3144 | organic hydroperoxide resistance protein                             | ohr  | 0.77  | 1.71 | 0.01 |
| ABAYE3170 | putative AMP-dependent synthetase/ligase                             |      | 0.46  | 1.38 | 0.00 |
| ABAYE3178 | putative DNA uptake protein and/or related DNA-binding protein       |      | -0.99 | 0.50 | 0.00 |

|           |                                                             |      |       |      |      |
|-----------|-------------------------------------------------------------|------|-------|------|------|
| ABAYE3194 | putative membrane protein                                   |      | 0.43  | 1.35 | 0.04 |
| ABAYE3195 | conserved hypothetical protein                              |      | -1.00 | 0.50 | 0.00 |
| ABAYE3196 | putative transport protein (MFS superfamily)                |      | -0.39 | 0.76 | 0.03 |
| ABAYE3208 | conserved hypothetical protein                              |      | 0.90  | 1.87 | 0.00 |
| ABAYE3217 | hypothetical protein                                        |      | -0.74 | 0.60 | 0.00 |
| ABAYE3218 | hypothetical protein                                        |      | 0.36  | 1.28 | 0.04 |
| ABAYE3219 | hypothetical protein                                        |      | 0.32  | 1.25 | 0.04 |
| ABAYE3223 | tRNA-dihydrouridine synthase A                              | dusA | 0.47  | 1.39 | 0.03 |
| ABAYE3224 | conserved hypothetical protein                              |      | 1.10  | 2.14 | 0.00 |
| ABAYE3225 | putative transcriptional regulator (LysR family)            |      | 0.30  | 1.23 | 0.02 |
| ABAYE3227 | putative enzyme NAD(P)-binding                              |      | 0.46  | 1.38 | 0.01 |
| ABAYE3228 | aconitate hydratase 1                                       | acnA | 0.88  | 1.84 | 0.00 |
| ABAYE3233 | conserved hypothetical protein                              |      | -2.00 | 0.25 | 0.00 |
| ABAYE3234 | putative transcriptional regulator (TetR family)            |      | -1.60 | 0.33 | 0.00 |
| ABAYE3235 | putative transcriptional regulator (TetR family)            |      | -1.10 | 0.47 | 0.01 |
| ABAYE3243 | conserved hypothetical protein%3B putative exported protein |      | -0.80 | 0.57 | 0.01 |
| ABAYE3251 | conserved hypothetical protein%3B putative membrane protein |      | -0.64 | 0.64 | 0.00 |
| ABAYE3253 | conserved hypothetical protein                              |      | 0.36  | 1.28 | 0.01 |

|           |                                                                                                                                                                                                                                                                                                                         |      |       |      |      |
|-----------|-------------------------------------------------------------------------------------------------------------------------------------------------------------------------------------------------------------------------------------------------------------------------------------------------------------------------|------|-------|------|------|
| ABAYE3257 | molecular chaperone in protein export                                                                                                                                                                                                                                                                                   | secB | -0.29 | 0.82 | 0.04 |
| ABAYE3258 | putative 4-phosphopantetheinyl transferase                                                                                                                                                                                                                                                                              |      | 0.40  | 1.32 | 0.01 |
| ABAYE3271 | carboxy-terminal protease for penicillin-binding protein                                                                                                                                                                                                                                                                | prc  | 0.31  | 1.24 | 0.02 |
| ABAYE3272 | beta-N-acetyl-D-glucosaminidase                                                                                                                                                                                                                                                                                         | nagZ | 0.40  | 1.32 | 0.02 |
| ABAYE3273 | conserved hypothetical protein                                                                                                                                                                                                                                                                                          |      | 0.31  | 1.24 | 0.03 |
| ABAYE3277 | putative NADP-dependent glyceraldehyde-3-phosphate dehydrogenase                                                                                                                                                                                                                                                        |      | 0.49  | 1.40 | 0.02 |
| ABAYE3278 | thermoresistant gluconokinase (Gluconate kinase)                                                                                                                                                                                                                                                                        | gntK | 0.39  | 1.31 | 0.03 |
| ABAYE3279 | high-affinity gluconate permease (GntP family)                                                                                                                                                                                                                                                                          | gntT | 0.56  | 1.47 | 0.00 |
| ABAYE3280 | bifunctional protein [Includes: 4-hydroxy-2-oxoglutarate aldolase (2-keto-4-hydroxyglutarate aldolase) (KHG-aldolase) 2-dehydro-3-deoxyphosphogluconate aldolase (Phospho-2-dehydro-3-deoxygluconate aldolase) (Phospho-2-keto-3-deoxygluconate aldolase) (2-keto-3-deoxy-6-phosphogluconate aldolase) (KDPG-aldolase)] | eda  | 0.35  | 1.27 | 0.03 |
| ABAYE3281 | phosphogluconate dehydratase (6-phosphogluconate dehydratase)                                                                                                                                                                                                                                                           | edd  | 0.55  | 1.46 | 0.00 |
| ABAYE3283 | phosphate acetyltransferase                                                                                                                                                                                                                                                                                             | pta  | 0.55  | 1.46 | 0.03 |
| ABAYE3293 | homoserine O-acetyltransferase                                                                                                                                                                                                                                                                                          | metX | 0.23  | 1.17 | 0.05 |
| ABAYE3294 | methionine biosynthesis protein                                                                                                                                                                                                                                                                                         | metW | 0.24  | 1.18 | 0.04 |
| ABAYE3302 | transposase of ISAbal IS4 family (ORF 1)                                                                                                                                                                                                                                                                                |      | -0.53 | 0.69 | 0.00 |
| ABAYE3309 | conserved hypothetical protein                                                                                                                                                                                                                                                                                          |      | 0.49  | 1.40 | 0.02 |
| ABAYE3311 | prolipoprotein diacylglycerol transferase                                                                                                                                                                                                                                                                               | lgt  | 0.42  | 1.34 | 0.00 |

|           |                                                                                                          |      |       |      |      |
|-----------|----------------------------------------------------------------------------------------------------------|------|-------|------|------|
| ABAYE3317 | peptide methionine sulfoxide reductase (Protein-methionine-S-oxide reductase) (Peptide Met(O) reductase) | msrA | 0.44  | 1.36 | 0.01 |
| ABAYE3318 | putative biopolymer transport protein (ExbD)                                                             |      | -0.60 | 0.66 | 0.05 |
| ABAYE3319 | putative biopolymer transport protein (ExbB)                                                             |      | -0.80 | 0.57 | 0.03 |
| ABAYE3330 | conserved hypothetical protein                                                                           |      | 0.45  | 1.37 | 0.01 |
| ABAYE3334 | conserved hypothetical protein%3B putative signal peptide                                                |      | -0.88 | 0.54 | 0.00 |
| ABAYE3348 | aspartate-semialdehyde dehydrogenase%2C NAD(P)-binding                                                   | asd  | -0.36 | 0.78 | 0.05 |
| ABAYE3349 | conserved hypothetical protein%3B putative signal peptide                                                |      | -1.20 | 0.44 | 0.00 |
| ABAYE3350 | conserved hypothetical protein                                                                           |      | -2.70 | 0.15 | 0.00 |
| ABAYE3356 | conserved hypothetical protein                                                                           |      | -1.20 | 0.44 | 0.00 |
| ABAYE3374 | 23S rRNA pseudouridylate synthase                                                                        | rluC | 0.39  | 1.31 | 0.04 |
| ABAYE3389 | conserved hypothetical protein%3B putative exported protein                                              |      | 0.44  | 1.36 | 0.05 |
| ABAYE3393 | ferrochelatase                                                                                           | hemH | -0.39 | 0.76 | 0.03 |
| ABAYE3394 | conserved hypothetical protein                                                                           |      | -0.89 | 0.54 | 0.01 |
| ABAYE3399 | small ubiquitous protein required for normal growth                                                      | sirA | 0.50  | 1.41 | 0.01 |
| ABAYE3410 | putative amino-acid efflux transmembrane protein                                                         |      | -0.76 | 0.59 | 0.00 |
| ABAYE3417 | conserved hypothetical protein %3B putative Penicillin-binding protein%2C transpeptidase fold            |      | 0.60  | 1.52 | 0.04 |
| ABAYE3421 | conserved hypothetical protein                                                                           |      | 0.45  | 1.37 | 0.01 |

|           |                                                                                                                                                                          |      |       |      |      |
|-----------|--------------------------------------------------------------------------------------------------------------------------------------------------------------------------|------|-------|------|------|
| ABAYE3427 | putative oxidoreductase%3B flavoprotein monooxygenase                                                                                                                    |      | -0.64 | 0.64 | 0.02 |
| ABAYE3444 | type 4 fimbrial biogenesis protein                                                                                                                                       | pilB | -3.20 | 0.11 | 0.00 |
| ABAYE3445 | type 4 fimbrial assembly protein                                                                                                                                         | pilC | -2.80 | 0.14 | 0.00 |
| ABAYE3446 | type 4 prepilin-like proteins leader peptide processing enzyme (Protein secretion protein XCPA)[Includes: Leader peptidase (Prepilin peptidase)%3B N-methyltransferase ] | pilD | -1.50 | 0.35 | 0.00 |
| ABAYE3447 | dephosphocoenzyme A kinase                                                                                                                                               | coaE | -0.44 | 0.74 | 0.00 |
| ABAYE3451 | conserved hypothetical protein                                                                                                                                           |      | -0.33 | 0.80 | 0.05 |
| ABAYE3453 | protein used in recombination and DNA repair                                                                                                                             | recN | -0.28 | 0.82 | 0.04 |
| ABAYE3466 | conserved hypothetical protein                                                                                                                                           |      | 0.83  | 1.78 | 0.03 |
| ABAYE3468 | conserved hypothetical protein%3B putative exported protein                                                                                                              |      | -2.30 | 0.20 | 0.00 |
| ABAYE3472 | conserved hypothetical protein%3B putative exported protein                                                                                                              |      | 0.57  | 1.48 | 0.01 |
| ABAYE3479 | conserved hypothetical protein                                                                                                                                           |      | -0.53 | 0.69 | 0.02 |
| ABAYE3481 | conserved hypothetical protein%3B putative exported protein                                                                                                              |      | 0.80  | 1.74 | 0.00 |
| ABAYE3486 | conserved hypothetical protein%3B putative exported protein                                                                                                              |      | 0.92  | 1.89 | 0.01 |
| ABAYE3487 | conserved hypothetical protein%3B putative exported protein                                                                                                              |      | 1.70  | 3.25 | 0.00 |
| ABAYE3490 | 50S ribosomal protein L7/L12                                                                                                                                             | rplL | -0.36 | 0.78 | 0.00 |
| ABAYE3496 | protein chain elongation factor EF-Tu (duplicate of tufA)                                                                                                                | tufB | -0.40 | 0.76 | 0.02 |
| ABAYE3518 | hydroxymethylpyrimidine moiety synthesis in thiamin biosynthesis                                                                                                         | thiC | 0.37  | 1.29 | 0.03 |

|           |                                                                          |       |       |      |      |
|-----------|--------------------------------------------------------------------------|-------|-------|------|------|
| ABAYE3519 | adenosine diphosphate sugar pyrophosphatase (ADP-ribose pyrophosphatase) | aspP  | -0.63 | 0.65 | 0.01 |
| ABAYE3525 | conserved hypothetical protein%3B putative exported protein              |       | -0.66 | 0.63 | 0.04 |
| ABAYE3528 | site-specific tyrosine recombinase                                       | xerD  | -0.75 | 0.59 | 0.00 |
| ABAYE3535 | type 4 fimbriae expression regulatory protein                            | pilR  | -1.70 | 0.31 | 0.00 |
| ABAYE3538 | conserved hypothetical protein%3B putative membrane protein              |       | 0.28  | 1.21 | 0.03 |
| ABAYE3550 | conserved hypothetical protein                                           |       | -0.36 | 0.78 | 0.02 |
| ABAYE3551 | fragment of magnesium chelatase%2C competence related protein (ComM)     |       | -0.63 | 0.65 | 0.00 |
| ABAYE3562 | hypothetical protein                                                     |       | 0.92  | 1.89 | 0.00 |
| ABAYE3565 | conserved hypothetical protein                                           |       | 0.89  | 1.85 | 0.00 |
| ABAYE3566 | hypothetical protein                                                     |       | 0.81  | 1.75 | 0.00 |
| ABAYE3567 | conserved hypothetical protein                                           |       | 0.72  | 1.65 | 0.00 |
| ABAYE3570 | Aminoglycoside 3-(9)-O-adenyltransferase AADA1                           | aadA1 | 0.59  | 1.51 | 0.02 |
| ABAYE3571 | putative GCN5-related N-acetyltransferase%2C OrfX                        |       | 0.44  | 1.36 | 0.01 |
| ABAYE3572 | putative GCN5-related N-acetyltransferase%2C OrfX                        |       | 0.36  | 1.28 | 0.04 |
| ABAYE3580 | transposase of IS15DI%2C IS6 family                                      |       | 0.36  | 1.28 | 0.02 |
| ABAYE3581 | Resolvase                                                                | tnpR  | 0.45  | 1.37 | 0.01 |
| ABAYE3582 | Transposase                                                              |       | 0.47  | 1.39 | 0.02 |

|             |                                                                         |      |      |      |      |
|-------------|-------------------------------------------------------------------------|------|------|------|------|
| ABAYE3583_1 | transposase of IS26%2C IS6 family                                       | tnpA | 0.42 | 1.34 | 0.03 |
| ABAYE3588   | putative GCN5-related N-acetyltransferase                               |      | 0.49 | 1.40 | 0.00 |
| ABAYE3589   | hypothetical protein                                                    |      | 0.97 | 1.96 | 0.00 |
| ABAYE3590   | hypothetical protein                                                    |      | 1.10 | 2.14 | 0.00 |
| ABAYE3591   | conserved hypothetical protein                                          |      | 0.98 | 1.97 | 0.00 |
| ABAYE3592   | hypothetical protein                                                    |      | 1.00 | 2.00 | 0.00 |
| ABAYE3593   | conserved hypothetical protein%3B putative Isochorismatase hydrolase    |      | 1.10 | 2.14 | 0.00 |
| ABAYE3596   | conserved hypothetical protein%3B putative membrane protein (PecM-like) |      | 0.87 | 1.83 | 0.00 |
| ABAYE3598   | tetracycline repressor protein                                          | tetR | 0.47 | 1.39 | 0.01 |
| ABAYE3599   | putative Relaxase/helicase                                              |      | 0.52 | 1.43 | 0.01 |
| ABAYE3601   | Mercuric resistance operon regulatory protein                           | merR | 0.65 | 1.57 | 0.01 |
| ABAYE3602   | fragment of conserved hypothetical protein (part 2)                     |      | 0.97 | 1.96 | 0.00 |
| ABAYE3603   | fragment of conserved hypothetical protein (part 1)                     |      | 0.84 | 1.79 | 0.03 |
| ABAYE3604   | Mercury resistance inner membrane protein                               | merC | 0.61 | 1.53 | 0.04 |
| ABAYE3605   | Mercuric reductase (Hg(II) reductase)                                   | merA | 0.91 | 1.88 | 0.00 |
| ABAYE3606   | HTH-type transcriptional regulator (Mercuric resistance protein merD)   | merD | 0.85 | 1.80 | 0.01 |
| ABAYE3607   | mercuric resistance protein                                             | merE | 1.00 | 2.00 | 0.00 |
| ABAYE3610   | conserved hypothetical protein                                          |      | 0.64 | 1.56 | 0.00 |



|           |                                                                                                                          |        |       |      |      |
|-----------|--------------------------------------------------------------------------------------------------------------------------|--------|-------|------|------|
| ABAYE3611 | conserved hypothetical protein                                                                                           |        | 0.89  | 1.85 | 0.01 |
| ABAYE3619 | Beta-lactamase OXA-10 precursor                                                                                          | oxa-10 | -0.42 | 0.75 | 0.03 |
| ABAYE3623 | Extended spectrum beta-lactamase VEB-1                                                                                   | veb-1  | -0.36 | 0.78 | 0.01 |
| ABAYE3624 | transposase of IS10A%2C IS4 family                                                                                       |        | 0.32  | 1.25 | 0.01 |
| ABAYE3627 | GroEL/integrase fusion protein                                                                                           |        | 0.33  | 1.26 | 0.05 |
| ABAYE3633 | GroEL/integrase fusion protein                                                                                           |        | 0.48  | 1.39 | 0.01 |
| ABAYE3636 | putative transcriptional regulator (LysR family)                                                                         |        | 0.65  | 1.57 | 0.01 |
| ABAYE3637 | Tetracycline resistance protein%2C class G (TETA(G))                                                                     | tetA   | 0.52  | 1.43 | 0.00 |
| ABAYE3639 | Tetracycline repressor protein class G                                                                                   | tetR   | 0.43  | 1.35 | 0.03 |
| ABAYE3647 | Streptomycin 3-kinase (Streptomycin 3-phosphotransferase) (SPH)                                                          | strB   | 0.53  | 1.44 | 0.03 |
| ABAYE3648 | Streptomycin 3-kinase (Streptomycin 3-phosphotransferase)<br>(Streptomycin 6-phosphotransferase) (Streptomycin 6-kinase) | aphE   | 0.48  | 1.39 | 0.02 |
| ABAYE3649 | fragment of Streptomycin 3-adenyltransferase                                                                             |        | 0.65  | 1.57 | 0.02 |
| ABAYE3671 | putative Dihydrodipicolinate synthase (DapA)                                                                             |        | -0.49 | 0.71 | 0.02 |
| ABAYE3685 | putative transport protein (MFS superfamily)                                                                             |        | 0.35  | 1.27 | 0.01 |
| ABAYE3686 | putative lysozyme                                                                                                        |        | 0.33  | 1.26 | 0.02 |
| ABAYE3690 | conserved hypothetical protein                                                                                           |        | 0.75  | 1.68 | 0.00 |
| ABAYE3693 | conserved hypothetical protein%3B putative membrane protein                                                              |        | 1.20  | 2.30 | 0.00 |

|           |                                                                                           |      |       |      |      |
|-----------|-------------------------------------------------------------------------------------------|------|-------|------|------|
| ABAYE3694 | conserved hypothetical protein%3B putative flavodoxin                                     |      | 0.92  | 1.89 | 0.00 |
| ABAYE3695 | conserved hypothetical protein                                                            |      | 1.20  | 2.30 | 0.00 |
| ABAYE3696 | subunit of cysteine synthase A and O-acetylserine sulfhydrylase A%2C PLP-dependent enzyme | cysK | -0.30 | 0.81 | 0.04 |
| ABAYE3697 | putative acetyltransferase                                                                |      | -0.50 | 0.71 | 0.02 |
| ABAYE3701 | conserved hypothetical protein                                                            |      | 0.48  | 1.39 | 0.02 |
| ABAYE3702 | fragment of conserved hypothetical protein (partial)                                      |      | 0.61  | 1.53 | 0.01 |
| ABAYE3703 | putative outer membrane copper receptor (OprC)                                            |      | 0.76  | 1.69 | 0.00 |
| ABAYE3704 | conserved hypothetical protein%3B putative exported protein                               |      | 0.49  | 1.40 | 0.01 |
| ABAYE3706 | conserved hypothetical protein%3B putative exported protein                               |      | -2.20 | 0.22 | 0.00 |
| ABAYE3707 | putative Rossmann-fold nucleotide-binding protein involved in DNA uptake (Smf)            |      | -1.80 | 0.29 | 0.00 |
| ABAYE3708 | putative ribosome maturation factor (dsRNA-binding protein) (RimN)                        |      | -0.28 | 0.82 | 0.03 |
| ABAYE3715 | membrane-bound ATP synthase %2C F1 sector%2C epsilon-subunit                              | atpC | -0.34 | 0.79 | 0.01 |
| ABAYE3719 | membrane-bound ATP synthase %2C F1 sector%2C delta-subunit                                | atpH | -0.37 | 0.77 | 0.01 |
| ABAYE3720 | membrane-bound ATP synthase%2C F0 sector%2C subunit b                                     | atpF | -0.36 | 0.78 | 0.01 |
| ABAYE3734 | glutathione S-transferase                                                                 |      | 0.37  | 1.29 | 0.05 |
| ABAYE3743 | putative integral membrane protein (DedA)                                                 |      | 0.32  | 1.25 | 0.02 |
| ABAYE3744 | putative membrane protein                                                                 |      | 0.39  | 1.31 | 0.04 |

|           |                                                                                                    |      |       |      |      |
|-----------|----------------------------------------------------------------------------------------------------|------|-------|------|------|
| ABAYE3745 | conserved hypothetical protein%3B putative exported protein                                        |      | 0.65  | 1.57 | 0.01 |
| ABAYE3746 | putative ATPase involved in chromosome partitioning (ParA family ATPase)                           |      | 0.44  | 1.36 | 0.01 |
| ABAYE3753 | putative efflux pump membrane transporter (RND superfamily)                                        |      | -1.20 | 0.44 | 0.00 |
| ABAYE3754 | putative Non-ribosomal peptide synthetase                                                          |      | -1.80 | 0.29 | 0.00 |
| ABAYE3755 | putative Phosphopantetheine binding protein                                                        |      | -1.30 | 0.41 | 0.02 |
| ABAYE3756 | putative acyl-CoA dehydrogenase                                                                    |      | -2.20 | 0.22 | 0.00 |
| ABAYE3757 | putative non-ribosomal peptide synthase%3B AMP-dependent synthetase and ligase domain              |      | -2.10 | 0.23 | 0.00 |
| ABAYE3758 | putative Autoinducer-binding transcriptional regulator (LuxR family)                               |      | -0.59 | 0.66 | 0.02 |
| ABAYE3761 | N-acylhomoserine lactone synthase%2C autoinducer synthesis protein                                 |      | -1.10 | 0.47 | 0.00 |
| ABAYE3762 | putative transport protein (MFS family)                                                            |      | 0.46  | 1.38 | 0.04 |
| ABAYE3766 | putative acetyl-coA synthetase/AMP-(fatty) acid ligase                                             |      | 0.59  | 1.51 | 0.00 |
| ABAYE3770 | APC family%2C D-serine/D-alanine/glycine transport protein                                         | cycA | -0.54 | 0.69 | 0.01 |
| ABAYE3771 | APC family%2C D-serine/D-alanine/glycine transport protein                                         | cycA | -0.59 | 0.66 | 0.04 |
| ABAYE3777 | putative ferric siderophore receptor protein                                                       |      | -0.29 | 0.82 | 0.04 |
| ABAYE3780 | putative dual specificity pseudouridine synthase for 23S rRNA and tRNAphe modification (RluA-like) |      | 0.49  | 1.40 | 0.01 |
| ABAYE3783 | putative Short-chain dehydrogenase/reductase SDR                                                   |      | -3.20 | 0.11 | 0.00 |
| ABAYE3789 | conserved hypothetical protein                                                                     |      | -0.53 | 0.69 | 0.01 |

|           |                                                                                                                                          |      |       |      |      |
|-----------|------------------------------------------------------------------------------------------------------------------------------------------|------|-------|------|------|
| ABAYE3791 | putative methyl-cis-aconitic acid hydratase (AcnM)                                                                                       |      | 0.67  | 1.59 | 0.01 |
| ABAYE3792 | methylcitrate synthase (citrate synthase 2)                                                                                              | prpC | 0.72  | 1.65 | 0.01 |
| ABAYE3793 | methylisocitrate lyase                                                                                                                   | prpB | 0.42  | 1.34 | 0.02 |
| ABAYE3794 | putative transcriptional regulator (GntR family)                                                                                         |      | 0.54  | 1.45 | 0.00 |
| ABAYE3796 | D-lactate dehydrogenase%2C NADH independent%2C FAD-binding domain                                                                        | dld  | -0.77 | 0.59 | 0.00 |
| ABAYE3797 | L-lactate dehydrogenase%2C FMN linked                                                                                                    | lldD | -1.20 | 0.44 | 0.00 |
| ABAYE3798 | transcriptional repressor for L-lactate utilization (GntR family)                                                                        | lldR | -1.10 | 0.47 | 0.00 |
| ABAYE3799 | L-lactate permease                                                                                                                       | lldP | -1.60 | 0.33 | 0.00 |
| ABAYE3816 | polysaccharide export protein                                                                                                            | wza  | 0.44  | 1.36 | 0.01 |
| ABAYE3817 | low molecular weight protein-tyrosine-phosphatase                                                                                        | ptp  | 0.51  | 1.42 | 0.00 |
| ABAYE3818 | tyrosine-protein kinase%2C autophosphorylates                                                                                            | ptk  | 0.42  | 1.34 | 0.01 |
| ABAYE3822 | N-acetyl-anhydromuramyl-L-alanine amidase (Regulates ampC)                                                                               | ampD | -0.53 | 0.69 | 0.00 |
| ABAYE3825 | phospholipase C precursor (PLC) (Phosphatidylcholine cholinephosphohydrolase) (Phosphatidylcholine-hydrolyzing phospholipase C) (PC-PLC) | plc  | -0.38 | 0.77 | 0.03 |
| ABAYE3831 | conserved hypothetical protein                                                                                                           |      | 0.27  | 1.21 | 0.04 |
| ABAYE3838 | conserved hypothetical protein%3B putative exported protein                                                                              |      | -1.40 | 0.38 | 0.01 |
| ABAYE3839 | N-alpha-acetylglutamate synthase (amino-acid acetyltransferase)                                                                          | argA | -0.61 | 0.66 | 0.00 |

|             |                                                                                                                |      |       |       |      |
|-------------|----------------------------------------------------------------------------------------------------------------|------|-------|-------|------|
| ABAYE3845   | putative transcriptional repressor (TetR/AcrR family)                                                          |      | -0.68 | 0.62  | 0.00 |
| ABAYE3846   | putative 5-methylthioadenosine/S-adenosylhomocysteine nucleosidase                                             |      | -0.55 | 0.68  | 0.01 |
| ABAYE3848   | putative malic acid transport protein                                                                          |      | -0.46 | 0.73  | 0.00 |
| ABAYE3861   | conserved hypothetical protein%3B putative exported protein                                                    |      | 3.70  | 13.00 | 0.00 |
| ABAYE3864   | Hsp 24 nucleotide exchange factor                                                                              | grpE | -0.64 | 0.64  | 0.03 |
| ABAYE3866   | hypothetical protein%3B putative peptidase M10A and M12B%2C matrixin and adamalysin%3B putative signal peptide |      | -0.98 | 0.51  | 0.00 |
| ABAYE3867   | hypothetical protein%3B putative signal peptide                                                                |      | -1.30 | 0.41  | 0.01 |
| ABAYE3868   | conserved hypothetical protein                                                                                 |      | -0.60 | 0.66  | 0.02 |
| ABAYE3874   | conserved hypothetical protein%3B putative membrane protein                                                    |      | -0.40 | 0.76  | 0.03 |
| ABAYE3877   | UDP-N-acetylmuramate:L-alanyl-gamma-D-glutamyl-meso-diaminopimelate ligase                                     | mpl  | 0.40  | 1.32  | 0.00 |
| ABAYE3888   | conserved hypothetical protein%3B putative membrane protein                                                    |      | 0.35  | 1.27  | 0.01 |
| ABAYE3891   | transposase of ISAb1%2C IS4 family (ORF 1)                                                                     |      | -0.49 | 0.71  | 0.03 |
| ABAYEtRNA21 | ABAYEtRNA21                                                                                                    |      | 1.20  | 2.30  | 0.05 |
| ABAYEtRNA24 | ABAYEtRNA24                                                                                                    |      | 0.44  | 1.36  | 0.03 |
| ABAYEtRNA30 | ABAYEtRNA30                                                                                                    |      | 0.57  | 1.48  | 0.04 |
| ABAYEtRNA5  | ABAYEtRNA5                                                                                                     |      | 0.39  | 1.31  | 0.02 |
| ABAYEtRNA6  | ABAYEtRNA6                                                                                                     |      | 0.49  | 1.40  | 0.00 |

|             |             |  |      |      |      |
|-------------|-------------|--|------|------|------|
| ABAYEtRNA7  | ABAYEtRNA7  |  | 0.62 | 1.54 | 0.00 |
| ABAYEtRNA72 | ABAYEtRNA72 |  | 0.86 | 1.82 | 0.01 |
