# Supplementary material for: The Acinetobacter baumannii Two-Component System AdeRS Regulates Genes Required for Multidrug Efflux, Biofilm Formation, and Virulence in a Strain-Specific Manner
Source: PubMed Central journal article supplement (PMC4850262; doi:10.1128/mbio.00430-16), 2016-04-19
Supplement: mbo002162774st3.pdf [file mbo002162774st3.pdf]

**Table S3** Gene expression data from the complete transcriptome analysis of *A. baumannii* S1 by RNA-Seq, showing differentially expressed genes ( $P < 0.05$ ) in *AYEΔadeAB* compared with S1.

| ABAYE Gene ID | Annotation                                                                                                         | Gene Name | log2 Fold Change | Fold Change | P.Value |
|---------------|--------------------------------------------------------------------------------------------------------------------|-----------|------------------|-------------|---------|
| ABAYE0005     | putative of Cytochrome b(562) (CybC)                                                                               |           | -0.25            | 0.84        | 0.05    |
| ABAYE0024     | conserved hypothetical protein                                                                                     |           | -0.11            | 0.93        | 0.01    |
| ABAYE0073     | histidine utilization repressor                                                                                    | hutC      | 0.22             | 1.16        | 0.00    |
| ABAYE0080     | conserved hypothetical protein%3B putative signal peptide                                                          |           | -0.31            | 0.81        | 0.01    |
| ABAYE0129     | putative flavoprotein monooxygenase acting on aromatic compound                                                    |           | 0.54             | 1.45        | 0.01    |
| ABAYE0138     | thiol:disulfide interchange protein precursor                                                                      | dsbD      | -0.14            | 0.91        | 0.02    |
| ABAYE0145     | putative ferric siderophore receptor protein                                                                       |           | -0.28            | 0.82        | 0.04    |
| ABAYE0148     | UDP-N-acetylglucosamine:N-acetylmuramyl-(pentapeptide) pyrophosphoryl-undecaprenol N-acetylglucosamine transferase | murG      | -0.18            | 0.88        | 0.02    |
| ABAYE0165     | putative ferredoxin                                                                                                |           | -0.90            | 0.54        | 0.01    |
| ABAYE0181     | putative transcriptional regulator (Lrp-like)                                                                      |           | 2.30             | 4.92        | 0.00    |
| ABAYE0198     | conserved hypothetical protein%3B putative membrane protein                                                        |           | 0.32             | 1.25        | 0.03    |
| ABAYE0207     | gamma-aminobutyrate permease                                                                                       | gabP      | 0.95             | 1.93        | 0.00    |
| ABAYE0209     | 4-aminobutyrate aminotransferase%2C PLP-dependent                                                                  | gabT      | 1.20             | 2.30        | 0.00    |

|           |                                                                      |      |       |      |      |
|-----------|----------------------------------------------------------------------|------|-------|------|------|
| ABAYE0210 | NADP+-dependent succinate semialdehyde dehydrogenase                 | gabD | 0.99  | 1.99 | 0.02 |
| ABAYE0229 | conserved hypothetical protein                                       |      | 0.52  | 1.43 | 0.02 |
| ABAYE0240 | water channel (aquaporin Z) (MIP family)                             | aqpZ | 0.32  | 1.25 | 0.00 |
| ABAYE0247 | putative membrane protein                                            |      | -0.37 | 0.77 | 0.05 |
| ABAYE0250 | phosphoribosylformimino-5-aminoimidazole carboxamide isomerase       | hisA | -0.32 | 0.80 | 0.01 |
| ABAYE0257 | putative acetyl-CoA hydrolase/transferase                            |      | -0.26 | 0.84 | 0.02 |
| ABAYE0262 | putative sulfate permease                                            |      | 0.28  | 1.21 | 0.03 |
| ABAYE0290 | putative membrane protein (ComM)                                     |      | -0.79 | 0.58 | 0.01 |
| ABAYE0291 | putative membrane protein (ComN)                                     |      | -0.94 | 0.52 | 0.02 |
| ABAYE0292 | putative membrane protein (ComO)                                     |      | -0.95 | 0.52 | 0.02 |
| ABAYE0293 | putative lipoprotein (ComL)                                          |      | -0.96 | 0.51 | 0.01 |
| ABAYE0294 | putative outer membrane protein (ComQ)                               |      | -1.10 | 0.47 | 0.02 |
| ABAYE0297 | conserved hypothetical protein                                       |      | -0.10 | 0.93 | 0.04 |
| ABAYE0317 | putative type IV fimbrial biogenesis protein                         |      | -0.94 | 0.52 | 0.03 |
| ABAYE0318 | putative competence factor involved in DNA binding and uptake (ComC) |      | -0.76 | 0.59 | 0.03 |
| ABAYE0320 | pilin like competence factor                                         | comF | -0.62 | 0.65 | 0.04 |
| ABAYE0381 | 1-deoxyxylulose-5-phosphate synthase                                 | dxs  | -0.10 | 0.93 | 0.02 |
| ABAYE0413 | 50S ribosomal protein L22                                            | rplV | 0.10  | 1.07 | 0.02 |

|           |                                                                                                                              |      |       |      |      |
|-----------|------------------------------------------------------------------------------------------------------------------------------|------|-------|------|------|
| ABAYE0506 | conserved hypothetical protein                                                                                               |      | -0.81 | 0.57 | 0.02 |
| ABAYE0519 | conserved hypothetical protein                                                                                               |      | 0.28  | 1.21 | 0.01 |
| ABAYE0523 | DNA repair protein%2C associated with replication forks                                                                      | radC | -0.28 | 0.82 | 0.03 |
| ABAYE0587 | putative glycosyl transferase                                                                                                |      | 1.90  | 3.73 | 0.00 |
| ABAYE0611 | conserved hypothetical protein                                                                                               |      | 0.24  | 1.18 | 0.01 |
| ABAYE0614 | acetylCoA carboxylase%2C beta subunit                                                                                        | accD | -0.17 | 0.89 | 0.05 |
| ABAYE0632 | putative glucose-sensitive porin (OprB-like )                                                                                |      | 0.18  | 1.13 | 0.04 |
| ABAYE0666 | conserved hypothetical protein%3B putative exported protein                                                                  |      | -0.52 | 0.70 | 0.01 |
| ABAYE0669 | twitching motility protein                                                                                                   | pill | -0.87 | 0.55 | 0.03 |
| ABAYE0670 | type IV pilus biogenesis protein                                                                                             | pilJ | -0.98 | 0.51 | 0.03 |
| ABAYE0671 | putative sensor histidine kinase/response regulator%3B putative protein of chemotactic signal transduction system (ChA-like) |      | -1.20 | 0.44 | 0.02 |
| ABAYE0674 | putative Oxygen-independent coproporphyrinogen III oxidase                                                                   |      | 1.80  | 3.48 | 0.00 |
| ABAYE0750 | conserved hypothetical protein%3B putative membrane protein                                                                  |      | -0.17 | 0.89 | 0.04 |
| ABAYE0773 | citrate synthase                                                                                                             | gltA | -0.06 | 0.96 | 0.04 |
| ABAYE0790 | conserved hypothetical protein                                                                                               |      | 0.17  | 1.13 | 0.04 |
| ABAYE0796 | putative methyltransferase                                                                                                   |      | 0.19  | 1.14 | 0.02 |
| ABAYE0816 | glycerol kinase                                                                                                              | glpk | -0.26 | 0.84 | 0.02 |

|           |                                                             |        |       |      |      |
|-----------|-------------------------------------------------------------|--------|-------|------|------|
| ABAYE0844 | hypothetical protein                                        |        | 1.00  | 2.00 | 0.05 |
| ABAYE0869 | conserved hypothetical protein%3B putative membrane protein |        | 0.46  | 1.38 | 0.04 |
| ABAYE1045 | conserved hypothetical protein%3B putative exported protein |        | 0.14  | 1.10 | 0.02 |
| ABAYE1048 | lipoprotein precursor                                       | nlpD   | 0.23  | 1.17 | 0.05 |
| ABAYE1055 | conserved hypothetical protein                              |        | -0.66 | 0.63 | 0.02 |
| ABAYE1056 | conserved hypothetical protein                              |        | -0.27 | 0.83 | 0.01 |
| ABAYE1109 | conserved hypothetical protein%3B putative signal peptide   |        | -0.21 | 0.86 | 0.00 |
| ABAYE1129 | conserved hypothetical protein%3B putative hydrolase        |        | 2.10  | 4.29 | 0.00 |
| ABAYE1148 | conserved hypothetical protein%3B putative signal pepetide  |        | 0.37  | 1.29 | 0.04 |
| ABAYE1153 | 30S ribosomal protein S2                                    | rpsB   | -0.10 | 0.93 | 0.04 |
| ABAYE1191 | putative secretion pathway ATPase                           |        | -0.68 | 0.62 | 0.04 |
| ABAYE1192 | conserved hypothetical protein%3B putative exported protein |        | 0.23  | 1.17 | 0.01 |
| ABAYE1210 | Ribonuclease Z (RNase Z) (tRNA 3 endonuclease)              | rnz    | 0.22  | 1.16 | 0.04 |
| ABAYE1285 | conserved hypothetical protein                              |        | -0.36 | 0.78 | 0.01 |
| ABAYE1286 | 30S ribosomal protein S21                                   | rpsU   | -0.39 | 0.76 | 0.01 |
| ABAYE1331 | putative transcriptional regulator (TetR family)            |        | 2.10  | 4.29 | 0.01 |
| ABAYE1334 | paraquat-inducible protein A (part 1)                       | pqiA-1 | -0.10 | 0.93 | 0.03 |

|           |                                                                                                           |      |       |      |      |
|-----------|-----------------------------------------------------------------------------------------------------------|------|-------|------|------|
| ABAYE1338 | conserved hypothetical protein%3B putative transthyretin domain                                           |      | 2.80  | 6.96 | 0.00 |
| ABAYE1339 | conserved hypothetical protein%3B putative signal peptide                                                 |      | 1.80  | 3.48 | 0.02 |
| ABAYE1442 | 16S rRNA pseudouridylate 516 synthase                                                                     | rsuA | -0.09 | 0.94 | 0.00 |
| ABAYE1479 | hypothetical protein                                                                                      |      | 2.30  | 4.92 | 0.00 |
| ABAYE1485 | putative transcriptional regulator (TetR family)                                                          |      | 2.00  | 4.00 | 0.03 |
| ABAYE1501 | conserved hypothetical protein                                                                            |      | 2.20  | 4.59 | 0.01 |
| ABAYE1511 | putative transcriptional regulator (LysR family)                                                          |      | 0.39  | 1.31 | 0.03 |
| ABAYE1544 | nitrite reductase%2C large subunit%2C nucleotide-and Fe/S-cluster binding                                 | nasD | 0.40  | 1.32 | 0.00 |
| ABAYE1604 | conserved hypothetical protein                                                                            |      | 0.19  | 1.14 | 0.03 |
| ABAYE1611 | conserved hypothetical protein%3B putative signal peptide                                                 |      | 2.00  | 4.00 | 0.00 |
| ABAYE1633 | conserved hypothetical protein                                                                            |      | 0.18  | 1.13 | 0.02 |
| ABAYE1665 | conserved hypothetical protein                                                                            |      | 0.28  | 1.21 | 0.02 |
| ABAYE1679 | gamma-carboxymuconolactone decarboxylase (CMD)                                                            | pcaC | 0.72  | 1.65 | 0.01 |
| ABAYE1685 | quininate/shikimate dehydrogenase [Pyrroloquinoline-quinone] (NAD(P)-independent quininate dehydrogenase) | quiA | 0.29  | 1.22 | 0.01 |
| ABAYE1700 | putative Amidase                                                                                          |      | 1.20  | 2.30 | 0.04 |
| ABAYE1702 | conserved hypothetical protein                                                                            |      | 1.60  | 3.03 | 0.00 |
| ABAYE1703 | conserved hypothetical protein                                                                            |      | 1.50  | 2.83 | 0.04 |

|           |                                                                                                    |      |       |      |      |
|-----------|----------------------------------------------------------------------------------------------------|------|-------|------|------|
| ABAYE1707 | putative Ferredoxin (Oxidoreductase FAD/NAD(P)-binding region)%3B putative aromatic oxidoreductase |      | 0.38  | 1.30 | 0.05 |
| ABAYE1711 | conserved hypothetical protein%3B putative signal peptide                                          |      | 0.81  | 1.75 | 0.02 |
| ABAYE1714 | 3-oxoadipate enol-lactonase II (Beta-ketoadipate enol-lactone hydrolase II)                        | catD | 0.44  | 1.36 | 0.01 |
| ABAYE1715 | beta-ketoadipyl CoA thiolase                                                                       | catF | 0.13  | 1.09 | 0.04 |
| ABAYE1724 | putative dihydroxyacid dehydratase (ilvD-like)                                                     |      | 0.47  | 1.39 | 0.01 |
| ABAYE1726 | conserved hypothetical protein                                                                     |      | 0.65  | 1.57 | 0.00 |
| ABAYE1729 | conserved hypothetical protein                                                                     |      | 2.40  | 5.28 | 0.00 |
| ABAYE1734 | putative transcriptional regulator (MerR family)                                                   |      | 0.58  | 1.49 | 0.02 |
| ABAYE1756 | putative transcriptional regulator (TetR family)                                                   |      | 0.71  | 1.64 | 0.00 |
| ABAYE1780 | putative NADP-dependent aldehyde dehydrogenase (AldH-like)                                         |      | 0.31  | 1.24 | 0.04 |
| ABAYE1816 | conserved hypothetical protein%3B putative hydrolase of the alpha/beta superfamily                 |      | 0.39  | 1.31 | 0.03 |
| ABAYE1822 | RND protein                                                                                        | adeB | -1.20 | 0.44 | 0.00 |
| ABAYE1833 | hypothetical protein                                                                               |      | 2.80  | 6.96 | 0.00 |
| ABAYE1856 | putative fimbrial protein precursor (Pilin)                                                        |      | 0.75  | 1.68 | 0.03 |
| ABAYE1863 | conserved hypothetical protein%3B putative catalase                                                |      | -1.30 | 0.41 | 0.00 |
| ABAYE1864 | hypothetical protein                                                                               |      | -6.00 | 0.02 | 0.00 |
| ABAYE1866 | hypothetical protein                                                                               |      | -8.70 | 0.00 | 0.00 |

|           |                                                                                                               |      |        |      |      |
|-----------|---------------------------------------------------------------------------------------------------------------|------|--------|------|------|
| ABAYE1870 | fragment of putative phospholipase D protein (part 1)                                                         |      | -3.30  | 0.10 | 0.01 |
| ABAYE1871 | fragment of putative phospholipase D protein (part 2)                                                         |      | -7.50  | 0.01 | 0.00 |
| ABAYE1874 | putative G:T/U mismatch-specific DNA glycosylase                                                              |      | -8.40  | 0.00 | 0.00 |
| ABAYE1875 | hypothetical protein                                                                                          |      | -6.40  | 0.01 | 0.00 |
| ABAYE1876 | hypothetical protein                                                                                          |      | -5.80  | 0.02 | 0.00 |
| ABAYE1877 | Zn-dependent dipeptidase                                                                                      | acdP | -8.30  | 0.00 | 0.00 |
| ABAYE1878 | coenzyme PQQ synthesis protein E (Coenzyme PQQ synthesis protein III)                                         | pqqE | -9.10  | 0.00 | 0.00 |
| ABAYE1879 | coenzyme PQQ synthesis protein D (Coenzyme PQQ synthesis protein II)                                          | pqqD | -7.50  | 0.01 | 0.00 |
| ABAYE1880 | coenzyme PQQ synthesis protein C (Coenzyme PQQ synthesis protein I)                                           | pqqC | -9.60  | 0.00 | 0.00 |
| ABAYE1881 | coenzyme PQQ synthesis protein B (Coenzyme PQQ synthesis protein V)                                           | pqqB | -9.80  | 0.00 | 0.00 |
| ABAYE1882 | coenzyme PQQ synthesis protein A (Coenzyme PQQ synthesis protein IV)                                          | pqqA | -6.20  | 0.01 | 0.00 |
| ABAYE1884 | fragment of polyphosphate kinase (Polyphosphoric acid kinase) (ATP-polyphosphate phosphotransferase) (part 2) | ppk  | -6.50  | 0.01 | 0.00 |
| ABAYE1885 | fragment of polyphosphate kinase (Polyphosphoric acid kinase) (ATP-polyphosphate phosphotransferase) (part 1) | ppk  | -10.00 | 0.00 | 0.00 |
| ABAYE1886 | conserved hypothetical protein%3B putative 5`-nucleotidase domain                                             |      | -6.30  | 0.01 | 0.00 |
| ABAYE1887 | putative Ferric uptake regulator                                                                              |      | -2.90  | 0.13 | 0.02 |
| ABAYE1888 | putative Isochorismatase (Isochorismate lyase) (2%2C3 dihydro-2%2C3 dihydroxybenzoate synthase)               |      | -7.10  | 0.01 | 0.00 |

|           |                                                                                           |      |       |      |      |
|-----------|-------------------------------------------------------------------------------------------|------|-------|------|------|
| ABAYE1889 | putative 2%2C3-Dihydro-2%2C3-dihydroxybenzoate dehydrogenase                              |      | -7.10 | 0.01 | 0.00 |
| ABAYE1890 | hypothetical protein                                                                      |      | -2.80 | 0.14 | 0.01 |
| ABAYE1892 | molybdate transport protein (ABC superfamily%2C atp_bind)                                 | modC | -6.50 | 0.01 | 0.00 |
| ABAYE1893 | molybdate transport protein (ABC superfamily%2C membrane)                                 | modB | -7.50 | 0.01 | 0.00 |
| ABAYE1894 | molybdate transport protein (ABC superfamily%2C peri_bind)                                | modA | -8.00 | 0.00 | 0.00 |
| ABAYE1895 | putative repressor of the modABC operon for molybdenum transport (ModE)                   |      | -2.40 | 0.19 | 0.00 |
| ABAYE1896 | anthranilate dioxygenase large subunit                                                    | antA | -4.90 | 0.03 | 0.00 |
| ABAYE1897 | anthranilate dioxygenase small subunit                                                    | antB | -4.40 | 0.05 | 0.00 |
| ABAYE1898 | anthranilate dioxygenase reductase                                                        | antC | -6.00 | 0.02 | 0.00 |
| ABAYE1900 | putative transcriptional regulator                                                        |      | -7.30 | 0.01 | 0.00 |
| ABAYE1901 | conserved hypothetical protein%3B putative exported protein                               |      | -3.70 | 0.08 | 0.00 |
| ABAYE1902 | conserved hypothetical protein                                                            |      | -3.00 | 0.13 | 0.00 |
| ABAYE1903 | conserved hypothetical protein                                                            |      | -4.00 | 0.06 | 0.01 |
| ABAYE1904 | putative oxidoreductase%2C short-chain dehydrogenase/reductase family                     |      | -4.60 | 0.04 | 0.00 |
| ABAYE1905 | fragment of putative carboxymethylenebutenolidase (Dienelactone hydrolase) (DLH) (part 2) |      | -2.70 | 0.15 | 0.01 |
| ABAYE1906 | fragment of putative carboxymethylenebutenolidase (Dienelactone hydrolase) (DLH) (part 1) |      | -4.40 | 0.05 | 0.00 |
| ABAYE1907 | putative Permease of the major facilitator superfamily                                    |      | -5.00 | 0.03 | 0.00 |



|           |                                                                                                                     |      |       |      |      |
|-----------|---------------------------------------------------------------------------------------------------------------------|------|-------|------|------|
| ABAYE1908 | putative transcriptional regulator                                                                                  |      | -7.20 | 0.01 | 0.00 |
| ABAYE1909 | 3-hydroxybutyrate dehydrogenase                                                                                     | bdhA | -7.50 | 0.01 | 0.00 |
| ABAYE1910 | putative D-beta-hydroxybutyrate permease                                                                            |      | -7.80 | 0.00 | 0.00 |
| ABAYE1911 | hypothetical protein                                                                                                |      | -3.60 | 0.08 | 0.01 |
| ABAYE1912 | putative transcriptional regulator (LysR family)                                                                    |      | -3.20 | 0.11 | 0.00 |
| ABAYE1926 | putative transport protein (ABC superfamily%2C atp_bind)%3B putative nitrate ABC transporter%2C ATP-binding protein |      | 0.92  | 1.89 | 0.05 |
| ABAYE1928 | putative transport protein (ABC superfamily%2C peri_bind)%3B putative nitrate ABC transporter%2C periplasmic        |      | 0.45  | 1.37 | 0.02 |
| ABAYE1951 | conserved hypothetical protein                                                                                      |      | -0.40 | 0.76 | 0.05 |
| ABAYE1971 | putative poly(R)-hydroxyalkanoic acid synthase                                                                      |      | 0.27  | 1.21 | 0.03 |
| ABAYE1972 | putative methyltransferase                                                                                          |      | 0.33  | 1.26 | 0.01 |
| ABAYE1981 | conserved hypothetical protein                                                                                      |      | 0.34  | 1.27 | 0.03 |
| ABAYE1985 | conserved hypothetical protein%3B putative membrane protein                                                         |      | 1.10  | 2.14 | 0.02 |
| ABAYE1987 | conserved hypothetical protein%3B putative membrane protein                                                         |      | 1.70  | 3.25 | 0.04 |
| ABAYE2012 | putative acyl-CoA dehydrogenase                                                                                     |      | 0.17  | 1.13 | 0.01 |
| ABAYE2014 | terminal alkane-1-monooxygenase                                                                                     | alkM | 0.48  | 1.39 | 0.00 |
| ABAYE2018 | putative poly(hydroxyalcanoate) granule associated protein                                                          |      | 0.24  | 1.18 | 0.04 |
| ABAYE2024 | co-chaperone protein (Hsc20)%2C believed to be involved in assembly of Fe-S                                         | hscB | 0.23  | 1.17 | 0.02 |

|           |                                                                                                                      |      |       |      |      |
|-----------|----------------------------------------------------------------------------------------------------------------------|------|-------|------|------|
|           | clusters                                                                                                             |      |       |      |      |
| ABAYE2032 | conserved hypothetical protein                                                                                       |      | 0.25  | 1.19 | 0.01 |
| ABAYE2043 | putative metallopeptidase                                                                                            |      | 0.29  | 1.22 | 0.02 |
| ABAYE2050 | putative biopolymer transport protein (EXBD-like)                                                                    |      | 0.40  | 1.32 | 0.04 |
| ABAYE2051 | putative biopolymer transport protein (EXBD-like)                                                                    |      | 0.66  | 1.58 | 0.01 |
| ABAYE2074 | type 4 fimbrial biogenesis protein                                                                                   | pilZ | -0.20 | 0.87 | 0.02 |
| ABAYE2091 | conserved hypothetical protein                                                                                       |      | 0.23  | 1.17 | 0.02 |
| ABAYE2103 | glycine cleavage complex protein H <sub>2</sub> C carrier of aminomethyl moiety via covalently bound lipoyl cofactor | gcvH | -0.27 | 0.83 | 0.02 |
| ABAYE2120 | conserved hypothetical protein                                                                                       |      | 1.30  | 2.46 | 0.04 |
| ABAYE2140 | hypothetical protein%3B putative exported protein                                                                    |      | 2.80  | 6.96 | 0.00 |
| ABAYE2152 | putative transcriptional regulator (TetR family)                                                                     |      | -0.27 | 0.83 | 0.01 |
| ABAYE2157 | conserved hypothetical protein%3B putative exported protein                                                          |      | 0.32  | 1.25 | 0.00 |
| ABAYE2177 | putative membrane protein                                                                                            |      | 0.40  | 1.32 | 0.05 |
| ABAYE2178 | conserved hypothetical protein                                                                                       |      | 0.29  | 1.22 | 0.02 |
| ABAYE2195 | putative chromate transport protein                                                                                  |      | 0.68  | 1.60 | 0.03 |
| ABAYE2198 | putative arsenite efflux transporter                                                                                 |      | 0.58  | 1.49 | 0.01 |
| ABAYE2199 | putative transcriptional regulator (ArsR family)                                                                     |      | 2.70  | 6.50 | 0.00 |

|           |                                                                                                                                |      |      |      |      |
|-----------|--------------------------------------------------------------------------------------------------------------------------------|------|------|------|------|
| ABAYE2200 | Arsenate reductase                                                                                                             |      | 0.63 | 1.55 | 0.05 |
| ABAYE2205 | putative transcriptional regulator                                                                                             |      | 0.29 | 1.22 | 0.02 |
| ABAYE2207 | putative permease                                                                                                              |      | 0.20 | 1.15 | 0.03 |
| ABAYE2223 | putative bifunctional protein [Includes: putative transcriptional regulator (GntR family)%3B putative amino transferase]       |      | 0.29 | 1.22 | 0.00 |
| ABAYE2229 | malonate decarboxylase%2C gamma subunit                                                                                        | mdcE | 0.37 | 1.29 | 0.03 |
| ABAYE2236 | conserved hypothetical protein%3B putative acetyltransferase                                                                   |      | 0.28 | 1.21 | 0.01 |
| ABAYE2277 | hypothetical protein%3B putative exported protein                                                                              |      | 1.70 | 3.25 | 0.01 |
| ABAYE2291 | conserved hypothetical protein%3B putative Biotin carboxylase                                                                  |      | 0.81 | 1.75 | 0.05 |
| ABAYE2292 | putative Hydroxymethylglutaryl-CoA lyase (HMG-CoA lyase) (HL) (3-hydroxy-3-methylglutarate-CoA lyase)(MvaB-like)               |      | 0.88 | 1.84 | 0.03 |
| ABAYE2302 | transport protein in catabolism of dicarboxylic acids (MFS superfamily)                                                        | dcaK | 0.62 | 1.54 | 0.05 |
| ABAYE2306 | dehydrogenase                                                                                                                  | dcaH | 0.44 | 1.36 | 0.03 |
| ABAYE2328 | putative gamma-carboxymuconolactone decarboxylase                                                                              |      | 0.42 | 1.34 | 0.03 |
| ABAYE2438 | Acetyl-/propionyl-coenzyme A carboxylase alpha chain [Includes: Biotin carboxylase %3B Biotin carboxyl carrier protein (BCCP)] | bccA | 1.10 | 2.14 | 0.01 |
| ABAYE2439 | putative allophanate hydrolase subunit 1 and 2                                                                                 |      | 1.10 | 2.14 | 0.01 |
| ABAYE2440 | conserved hypothetical protein                                                                                                 |      | 1.10 | 2.14 | 0.01 |
| ABAYE2441 | putative lactam utilization protein                                                                                            |      | 1.10 | 2.14 | 0.01 |

|           |                                                                                                                           |      |       |      |      |
|-----------|---------------------------------------------------------------------------------------------------------------------------|------|-------|------|------|
| ABAYE2442 | conserved hypothetical protein%3B putative membrane protein                                                               |      | 1.10  | 2.14 | 0.00 |
| ABAYE2466 | putative transcriptional regulator (TetR family)                                                                          |      | 0.62  | 1.54 | 0.02 |
| ABAYE2531 | hypothetical protein                                                                                                      |      | 2.00  | 4.00 | 0.01 |
| ABAYE2543 | putative exodeoxyribonuclease VII small subunit (Exonuclease VII small subunit)                                           |      | 0.32  | 1.25 | 0.00 |
| ABAYE2546 | conserved hypothetical protein                                                                                            |      | 0.45  | 1.37 | 0.02 |
| ABAYE2553 | transcriptional regulator of benzoate degradation (LysR family)                                                           | benM | -0.29 | 0.82 | 0.04 |
| ABAYE2562 | putative 3-oxoacyl-[acyl-carrier-protein] synthase III                                                                    |      | -0.16 | 0.90 | 0.02 |
| ABAYE2579 | conserved hypothetical protein                                                                                            |      | 0.72  | 1.65 | 0.01 |
| ABAYE2591 | conserved hypothetical protein%3B putative membrane protein                                                               |      | -0.66 | 0.63 | 0.01 |
| ABAYE2613 | putative short-chain dehydrogenase                                                                                        |      | 0.56  | 1.47 | 0.04 |
| ABAYE2634 | conserved hypothetical protein                                                                                            |      | 1.10  | 2.14 | 0.00 |
| ABAYE2663 | putative bifunctional protein [Includes: lytic murein transglycosylase C%2C membrane-bound (MtlD)%3B cell wall hydrolase] |      | -0.04 | 0.97 | 0.02 |
| ABAYE2667 | esterase                                                                                                                  | aesT | -0.24 | 0.85 | 0.04 |
| ABAYE2669 | conserved hypothetical protein                                                                                            |      | -0.48 | 0.72 | 0.01 |
| ABAYE2674 | putative Cation efflux system protein                                                                                     |      | -0.29 | 0.82 | 0.04 |
| ABAYE2689 | conserved hypothetical protein                                                                                            |      | 1.90  | 3.73 | 0.00 |
| ABAYE2700 | hypothetical protein%3B putative exported protein                                                                         |      | 2.20  | 4.59 | 0.00 |

|           |                                                             |      |       |      |      |
|-----------|-------------------------------------------------------------|------|-------|------|------|
| ABAYE2764 | glutamate dehydrogenase%2C NADP-specific                    | gdhA | -0.21 | 0.86 | 0.03 |
| ABAYE2821 | conserved hypothetical protein                              |      | 2.10  | 4.29 | 0.00 |
| ABAYE2823 | putative transketolase C-terminal section                   |      | 0.33  | 1.26 | 0.04 |
| ABAYE2832 | putative Glutaminase                                        |      | -0.21 | 0.86 | 0.05 |
| ABAYE2836 | putative acetolactate synthase (IlvB-like)                  |      | 0.54  | 1.45 | 0.02 |
| ABAYE2839 | putative short-chain dehydrogenase                          |      | 0.43  | 1.35 | 0.00 |
| ABAYE2847 | conserved hypothetical protein                              |      | 0.45  | 1.37 | 0.01 |
| ABAYE2849 | putative transcriptional regulator (PcaU-like)              |      | 0.24  | 1.18 | 0.02 |
| ABAYE2915 | ATP-dependent dsDNA exonuclease (Suppression of recBC)      | sbcD | -0.20 | 0.87 | 0.04 |
| ABAYE2918 | twitching motility protein                                  | pilT | -0.87 | 0.55 | 0.03 |
| ABAYE2919 | twitching motility protein                                  | pilU | -0.90 | 0.54 | 0.01 |
| ABAYE2941 | leucyl%2C phenylalanyl-tRNA-protein transferase             | aat  | 0.11  | 1.08 | 0.03 |
| ABAYE2952 | conserved hypothetical protein%3B putative membrane protein |      | -0.28 | 0.82 | 0.01 |
| ABAYE3036 | putative multidrug resistance efflux pump                   |      | 0.16  | 1.12 | 0.01 |
| ABAYE3045 | hypothetical protein                                        |      | 0.70  | 1.62 | 0.02 |
| ABAYE3052 | NADH dehydrogenase I chain J                                | nuoJ | 0.20  | 1.15 | 0.02 |
| ABAYE3053 | NADH dehydrogenase I chain I%2C 2Fe-2S ferredoxin-related   | nuoI | 0.27  | 1.21 | 0.00 |
| ABAYE3054 | NADH dehydrogenase I chain H                                | nuoH | 0.22  | 1.16 | 0.00 |

|           |                                                                             |        |       |      |      |
|-----------|-----------------------------------------------------------------------------|--------|-------|------|------|
| ABAYE3055 | NADH dehydrogenase I chain G                                                | nuoG   | 0.14  | 1.10 | 0.02 |
| ABAYE3056 | NADH dehydrogenase I chain F                                                | nuoF   | 0.23  | 1.17 | 0.02 |
| ABAYE3057 | NADH dehydrogenase I chain E                                                | nuoE   | 0.23  | 1.17 | 0.02 |
| ABAYE3085 | putative Transcriptional Regulator (AraC family)                            |        | 2.50  | 5.66 | 0.00 |
| ABAYE3090 | putative substrate-binding protein (ABC superfamily%2C peri-bind)           |        | 0.43  | 1.35 | 0.04 |
| ABAYE3091 | putative transcriptional regulator (LysR family)                            |        | 0.24  | 1.18 | 0.02 |
| ABAYE3123 | putative pilus assembly protein (FilF)                                      |        | 1.90  | 3.73 | 0.00 |
| ABAYE3143 | putative transcriptional regulator (MarR family)                            |        | 0.27  | 1.21 | 0.04 |
| ABAYE3162 | hypothetical protein%3B putative exported protein                           |        | 1.20  | 2.30 | 0.01 |
| ABAYE3167 | putative glutathione S-transferase                                          |        | -0.21 | 0.86 | 0.03 |
| ABAYE3191 | pyridine nucleotide transhydrogenase%2C beta subunit                        | pntB   | 1.10  | 2.14 | 0.00 |
| ABAYE3192 | pyridine nucleotide transhydrogenase (proton pump)%2C alpha subunit (part2) | pntA-2 | 1.20  | 2.30 | 0.00 |
| ABAYE3193 | pyridine nucleotide transhydrogenase (proton pump)%2C alpha subunit (part1) | pntA-1 | 1.00  | 2.00 | 0.00 |
| ABAYE3218 | hypothetical protein                                                        |        | 0.81  | 1.75 | 0.02 |
| ABAYE3282 | acetate kinase (propionate kinase)                                          | ack    | -0.31 | 0.81 | 0.04 |
| ABAYE3286 | conserved hypothetical protein%3B putative exported protein                 |        | -0.37 | 0.77 | 0.03 |
| ABAYE3304 | fragment of putative phospholipase D protein (part 1)                       |        | -4.20 | 0.05 | 0.00 |

|           |                                                                                                                                                                          |      |       |      |      |
|-----------|--------------------------------------------------------------------------------------------------------------------------------------------------------------------------|------|-------|------|------|
| ABAYE3305 | fragment of putative phospholipase D protein (part 2)                                                                                                                    |      | -7.80 | 0.00 | 0.00 |
| ABAYE3333 | conserved hypothetical protein%3B putative membrane protein                                                                                                              |      | -0.13 | 0.91 | 0.04 |
| ABAYE3334 | conserved hypothetical protein%3B putative signal peptide                                                                                                                |      | -0.31 | 0.81 | 0.00 |
| ABAYE3347 | conserved hypothetical protein%3B putative membrane protein                                                                                                              |      | -0.20 | 0.87 | 0.04 |
| ABAYE3394 | conserved hypothetical protein                                                                                                                                           |      | -0.33 | 0.80 | 0.00 |
| ABAYE3403 | conserved hypothetical protein%3B putative membrane protein                                                                                                              |      | -0.25 | 0.84 | 0.01 |
| ABAYE3445 | type 4 fimbrial assembly protein                                                                                                                                         | pilC | -0.85 | 0.55 | 0.01 |
| ABAYE3446 | type 4 prepilin-like proteins leader peptide processing enzyme (Protein secretion protein XCPA)[Includes: Leader peptidase (Prepilin peptidase)%3B N-methyltransferase ] | pilD | -0.53 | 0.69 | 0.01 |
| ABAYE3447 | dephosphocoenzyme A kinase                                                                                                                                               | coaE | -0.33 | 0.80 | 0.04 |
| ABAYE3517 | conserved hypothetical protein%3B putative exported protein                                                                                                              |      | 0.24  | 1.18 | 0.03 |
| ABAYE3535 | type 4 fimbriae expression regulatory protein                                                                                                                            | pilR | -0.67 | 0.63 | 0.03 |
| ABAYE3553 | putative sulfate transporter (MFS superfamily)                                                                                                                           |      | 2.00  | 4.00 | 0.01 |
| ABAYE3658 | Protein arsC (Arsenate reductase) (Arsenical pump modifier) (Low molecular weight protein-tyrosine-phosphatase)                                                          | arsC | 2.80  | 6.96 | 0.00 |
| ABAYE3659 | arsenite efflux transporter                                                                                                                                              | arsB | 0.53  | 1.44 | 0.02 |
| ABAYE3662 | putative monooxygenase                                                                                                                                                   |      | 2.50  | 5.66 | 0.01 |
| ABAYE3694 | conserved hypothetical protein%3B putative flavodoxin                                                                                                                    |      | 0.34  | 1.27 | 0.00 |

|           |                                                                                                   |      |       |      |      |
|-----------|---------------------------------------------------------------------------------------------------|------|-------|------|------|
| ABAYE3697 | putative acetyltransferase                                                                        |      | -0.29 | 0.82 | 0.02 |
| ABAYE3700 | putative transcription regulator protein (TetR family)                                            |      | 0.65  | 1.57 | 0.03 |
| ABAYE3704 | conserved hypothetical protein%3B putative exported protein                                       |      | 0.22  | 1.16 | 0.01 |
| ABAYE3706 | conserved hypothetical protein%3B putative exported protein                                       |      | -0.80 | 0.57 | 0.03 |
| ABAYE3731 | NAD-linked malate dehydrogenase%2C Rossmann fold                                                  | sfcA | -0.25 | 0.84 | 0.00 |
| ABAYE3751 | putative bifunctional protein [Includes: NAD-dependent epimerase/dehydratase%3B Carboxylesterase] |      | 0.31  | 1.24 | 0.04 |
| ABAYE3752 | conserved hypothetical protein%3B putative porin                                                  |      | 0.62  | 1.54 | 0.03 |
| ABAYE3754 | putative Non-ribosomal peptide synthetase                                                         |      | 0.85  | 1.80 | 0.03 |
| ABAYE3756 | putative acyl-CoA dehydrogenase                                                                   |      | 0.88  | 1.84 | 0.05 |
| ABAYE3758 | putative Autoinducer-binding transcriptional regulator (LuxR family)                              |      | -0.28 | 0.82 | 0.04 |
| ABAYE3760 | conserved hypothetical protein                                                                    |      | 0.59  | 1.51 | 0.04 |
| ABAYE3764 | putative Enoyl-CoA hydratase                                                                      |      | 0.39  | 1.31 | 0.01 |
| ABAYE3765 | putative acyl-CoA dehydrogenase                                                                   |      | 0.44  | 1.36 | 0.01 |
| ABAYE3766 | putative acetyl-coA synthetase/AMP-(fatty) acid ligase                                            |      | 0.88  | 1.84 | 0.03 |
| ABAYE3767 | 3-hydroxyisobutyrate dehydrogenase                                                                | mmsB | 1.00  | 2.00 | 0.05 |
| ABAYE3781 | conserved hypothetical protein                                                                    |      | 0.19  | 1.14 | 0.03 |
| ABAYE3794 | putative transcriptional regulator (GntR family)                                                  |      | -0.52 | 0.70 | 0.03 |



|             |                                                             |  |       |      |      |
|-------------|-------------------------------------------------------------|--|-------|------|------|
| ABAYE3815   | putative UDP-glucose/GDP-mannose dehydrogenase              |  | 2.30  | 4.92 | 0.00 |
| ABAYE3838   | conserved hypothetical protein%3B putative exported protein |  | 0.73  | 1.66 | 0.01 |
| ABAYE3893   | fragment of putative phospholipase D protein (part 1)       |  | -4.10 | 0.06 | 0.00 |
| ABAYE3894   | fragment of putative phospholipase D protein (part 2)       |  | -7.70 | 0.00 | 0.00 |
| ABAYEtRNA13 | ABAYEtRNA13                                                 |  | 2.20  | 4.59 | 0.00 |
| ABAYEtRNA21 | ABAYEtRNA21                                                 |  | 2.10  | 4.29 | 0.00 |
| ABAYEtRNA26 | ABAYEtRNA26                                                 |  | 2.00  | 4.00 | 0.00 |
| ABAYEtRNA57 | ABAYEtRNA57                                                 |  | 1.20  | 2.30 | 0.01 |
| ABAYEtRNA59 | ABAYEtRNA59                                                 |  | 1.20  | 2.30 | 0.04 |
| ABAYEtRNA60 | ABAYEtRNA60                                                 |  | 1.30  | 2.46 | 0.00 |
| ABAYEtRNA62 | ABAYEtRNA62                                                 |  | 1.90  | 3.73 | 0.00 |
| ABAYEtRNA63 | ABAYEtRNA63                                                 |  | 2.40  | 5.28 | 0.00 |
| ABAYEtRNA64 | ABAYEtRNA64                                                 |  | 1.80  | 3.48 | 0.02 |
| ABAYEtRNA65 | ABAYEtRNA65                                                 |  | 1.80  | 3.48 | 0.01 |
| ABAYEtRNA71 | ABAYEtRNA71                                                 |  | 1.20  | 2.30 | 0.01 |
| ABAYEtRNA72 | ABAYEtRNA72                                                 |  | 2.40  | 5.28 | 0.00 |
| ABAYEtRNA8  | ABAYEtRNA8                                                  |  | 1.80  | 3.48 | 0.02 |
